# Supplementary material for: Global Patterns of Protein Domain Gain and Loss in Superkingdoms
Source: PLoS Comput Biol. 2014 Jan 30;10(1):e1003452. doi: 10.1371/journal.pcbi.1003452 (PMC3907288; doi:10.1371/journal.pcbi.1003452)
Supplement: Dataset S2 — Names, SCOP css, and the number of times each of the 2,262 parsimony informative FFs was gained/lost in abundance reconstruction. Eight FFs from the 420-proteome dataset were given new ids in SCOP 1.75 and were therefore renamed. (XLS) [file pcbi.1003452.s002.xls]

## Sheet: Table1.txt
No.	SCOP Id	SCOP css	Description	Gains	Losses
1	46459	a.1.1.1	Truncated hemoglobin	15	-2
2	46463	a.1.1.2	Globins	105	-44
3	46532	a.1.1.3	Phycocyanin-like phycobilisome proteins	14	-12
4	46549	a.1.2.1	Fumarate reductase/Succinate dehydogenase iron-sulfur protein, C-terminal domain	65	-37
5	46553	a.1.2.2	Dihydropyrimidine dehydrogenase, N-terminal domain	30	-13
6	48180	a.100.1.1	Hydroxyisobutyrate and 6-phosphogluconate dehydrogenase domain	97	-54
7	48184	a.100.1.2	Acetohydroxy acid isomeroreductase (ketol-acid reductoisomerase, KARI)	22	-41
8	48187	a.100.1.3	HCDH C-domain-like	42	-35
9	48191	a.100.1.4	UDP-glucose/GDP-mannose dehydrogenase dimerisation domain	49	-16
10	48194	a.100.1.5	N-(1-D-carboxylethyl)-L-norvaline dehydrogenase	6	-6
11	48197	a.100.1.6	Glycerol-3-phosphate dehydrogenase	29	-37
12	69084	a.100.1.7	Ketopantoate reductase PanE	12	0
13	81843	a.100.1.9	Mannitol 2-dehydrogenase	65	-13
14	48202	a.101.1.1	Uteroglobin-like	6	-4
15	48209	a.102.1.1	Glucoamylase	13	-8
16	48213	a.102.1.2	Cellulases catalytic domain	139	-27
17	48222	a.102.1.3	N-acylglucosamine (NAG) epimerase	30	-15
18	63588	a.102.1.4	Glycosyltransferase family 36 C-terminal domain	130	-63
19	81850	a.102.1.5	Bacterial glucoamylase C-terminal domain-like	33	-4
20	89108	a.102.1.6	Hypothetical protein YteR	38	-8
21	109953	a.102.1.7	Glycosyl Hydrolase Family 88	53	-8
22	48226	a.102.2.1	Class I alpha-1;2-mannosidase, catalytic domain	37	-36
23	48231	a.102.3.1	Alginate lyase A1-III	2	0
24	48234	a.102.3.2	Hyaluronate lyase-like catalytic, N-terminal domain	11	-2
25	48240	a.102.4.1	Terpenoid cyclase N-terminal domain	14	-7
26	48243	a.102.4.2	Terpene synthases	67	-20
27	48246	a.102.4.3	Protein prenyltransferases	23	-24
28	48251	a.102.4.4	Complement components	35	-33
29	81854	a.102.5.1	Family 10 polysaccharide lyase	12	0
30	48257	a.103.1.1	Citrate synthase	106	-62
31	48265	a.104.1.1	Cytochrome P450	212	-117
32	48301	a.108.1.1	Ribosomal protein L7/12, oligomerisation (N-terminal) domain	2	0
33	48306	a.109.1.1	Class II MHC-associated invariant chain ectoplasmic trimerization domain	3	-14
34	47028	a.11.1.1	Acyl-CoA binding protein	35	-35
35	47032	a.11.2.1	Second domain of FERM	34	-14
36	48311	a.110.1.1	Aldehyde ferredoxin oxidoreductase, C-terminal domains	74	-27
37	48318	a.111.1.1	Type 2 phosphatidic acid phosphatase, PAP2	23	0
38	48321	a.111.1.2	Haloperoxidase (bromoperoxidase)	11	-2
39	48325	a.111.1.3	Chloroperoxidase	4	0
40	48335	a.113.1.1	DNA repair protein MutS, domain III	20	-18
41	48341	a.114.1.1	Interferon-induced guanylate-binding protein 1 (GBP1), C-terminal domain	26	-23
42	48351	a.116.1.1	BCR-homology GTPase activation domain (BH-domain)	43	-32
43	48360	a.116.1.2	p120GAP domain-like	55	-35
44	48367	a.117.1.1	Ras GEF	45	-40
45	48372	a.118.1.1	Armadillo repeat	40	-20
46	74771	a.118.1.10	Clathrin adaptor core protein	38	-15
47	89129	a.118.1.13	PHAT domain	7	-4
48	100908	a.118.1.14	MIF4G domain-like	44	-23
49	101407	a.118.1.15	Mo25 protein	28	-16
50	109965	a.118.1.17	BC3264-like	7	0
51	109968	a.118.1.18	Eukaryotic translation initiation factor 3 subunit 12, eIF3k, N-terminal domain	13	-21
52	48385	a.118.1.2	HEAT repeat	40	-21
53	48390	a.118.1.3	Clathrin heavy chain proximal leg segment	36	-14
54	48393	a.118.1.4	Clathrin heavy-chain linker domain	33	-20
55	48396	a.118.1.5	Leucine-rich repeat variant	23	-4
56	48399	a.118.1.6	Phoshoinositide 3-kinase (PI3K) helical domain	53	-24
57	63608	a.118.1.7	Leukotriene A4 hydrolase C-terminal domain	22	-6
58	63611	a.118.1.8	Pumilio repeat	53	-17
59	63614	a.118.1.9	Regulatory subunit H of the V-type ATPase	26	-20
60	48480	a.118.11.1	Cytochrome c oxidase subunit E	19	-16
61	69100	a.118.12.1	Ran-GTPase activating protein 1 (RanGAP1), C-terminal domain	20	-6
62	69104	a.118.13.1	Arp2/3 complex 16 kDa subunit ARPC5	21	-17
63	48030	a.118.14.1	FliG	25	-46
64	74779	a.118.15.1	Aconitase B, N-terminal domain	23	-18
65	74785	a.118.16.1	Translin	19	-26
66	74789	a.118.17.1	Cullin repeat	38	-32
67	81902	a.118.18.1	HCP-like	61	-5
68	101421	a.118.19.1	C-terminal domain of Ku80	12	-10
69	101425	a.118.20.1	Hypothetical protein ST1625	2	0
70	81898	a.118.21.1	Chemosensory protein Csp2	17	-5
71	81895	a.118.22.1	IP3 receptor type 1 binding core, domain 2	30	-18
72	48426	a.118.3.1	Sec7 domain	36	-35
73	48432	a.118.4.1	Lipovitellin-phosvitin complex, superhelical domain	26	0
74	48436	a.118.5.1	Bacterial muramidases	10	-4
75	48440	a.118.6.1	Protein prenylyltransferase	23	-20
76	48446	a.118.7.1	14-3-3 protein	53	-26
77	48453	a.118.8.1	Tetratricopeptide repeat (TPR)	121	-27
78	69094	a.118.8.2	Transcription factor MalT domain III	5	-4
79	48465	a.118.9.1	ENTH domain	49	-28
80	48468	a.118.9.2	VHS domain	32	-17
81	100911	a.118.9.3	Phosphoinositide-binding clathrin adaptor, N-terminal domain	27	-15
82	109975	a.118.9.4	RPR domain (SMART 00582 )	10	-2
83	48485	a.119.1.1	Plant lipoxigenases	14	-5
84	48489	a.119.1.2	Animal lipoxigenases	23	-16
85	47041	a.12.1.1	Kix domain of CBP (creb binding protein)	21	-17
86	48499	a.121.1.1	Tetracyclin repressor-like, C-terminal domain	40	-4
87	48509	a.123.1.1	Nuclear receptor ligand-binding domain	29	-6
88	48538	a.124.1.1	Phospholipase C	6	0
89	48543	a.124.1.2	P1 nuclease	18	-7
90	48553	a.126.1.1	Serum albumin-like	25	-13
91	48558	a.127.1.1	L-aspartase/fumarase	108	-71
92	48572	a.127.1.2	HAL/PAL-like	136	-73
93	48577	a.128.1.1	Isoprenyl diphosphate synthases	88	-63
94	48580	a.128.1.2	Squalene synthase	18	-14
95	48583	a.128.1.3	Terpenoid cyclase C-terminal domain	15	-8
96	48586	a.128.1.4	Aristolochene/pentalenene synthase	13	-2
97	69113	a.128.1.5	Trichodiene synthase	5	-2
98	48593	a.129.1.1	GroEL chaperone, ATPase domain	63	-25
99	48596	a.129.1.2	Group II chaperonin (CCT, TRIC), ATPase domain	42	-12
100	47046	a.13.1.1	RAP domain	10	-4
101	48601	a.130.1.1	Dimeric chorismate mutase	2	0
102	48604	a.130.1.2	Allosteric chorismate mutase	6	-7
103	48614	a.132.1.1	Eukaryotic type heme oxygenase	45	-14
104	63627	a.132.1.2	Heme oxygenase HemO (PigA)	9	0
105	101458	a.132.1.3	TENA/THI-4	43	-11
106	101463	a.132.1.4	PqqC-like	33	-16
107	48620	a.133.1.1	Insect phospholipase A2	11	-6
108	48623	a.133.1.2	Vertebrate phospholipase A2	29	-16
109	63630	a.133.1.3	Prokaryotic phospholipase A2	5	0
110	48653	a.135.1.1	Tetraspanin	7	-12
111	101495	a.137.10.1	Stathmin	17	-8
112	48667	a.137.2.1	Methanol dehydrogenase subunit	8	0
113	48671	a.137.3.1	Transducin (heterotrimeric G protein), gamma chain	16	-15
114	48675	a.137.4.1	Fe-only hydrogenase smaller subunit	2	0
115	48679	a.137.5.1	Moesin tail domain	21	-15
116	69132	a.137.9.1	Quinohemoprotein amine dehydrogenase C chain	6	-2
117	48696	a.138.1.1	Cytochrome c3-like	9	0
118	48707	a.138.1.2	Photosynthetic reaction centre (cytochrome subunit)	6	0
119	48711	a.138.1.3	Di-heme elbow motif	58	-23
120	47051	a.14.1.1	VHP, Villin headpiece domain	21	-17
121	63452	a.140.1.1	LEM domain	14	-17
122	68907	a.140.2.1	SAP domain	8	-1
123	63502	a.141.1.1	Frizzled cysteine-rich domain	26	-15
124	63521	a.142.1.1	PTS-regulatory domain, PRD	30	-4
125	55294	a.143.1.2	RPB6	9	-28
126	63571	a.144.1.1	PABC (PABP) domain	50	-24
127	63593	a.145.1.1	Flagellar transcriptional activator FlhD	4	-2
128	63601	a.146.1.1	Telomeric repeat binding factor (TRF) dimerisation domain	15	-9
129	69037	a.147.1.1	Bcr-Abl oncoprotein oligomerization domain	10	-4
130	69061	a.148.1.1	Arp2/3 complex 21 kDa subunit ARPC3	26	-8
131	69066	a.149.1.1	RNase III catalytic domain-like	20	-45
132	47056	a.15.1.1	TAF(II)230 TBP-binding fragment	8	0
133	69119	a.152.1.1	AhpD	18	-8
134	101468	a.152.1.2	CMD-like	4	0
135	69126	a.153.1.1	Nuclear receptor coactivator interlocking domain	12	-10
136	81272	a.155.1.1	H-NS histone-like proteins	2	0
137	46947	a.156.1.1	Ribosomal protein S13	18	-4
138	81626	a.156.1.2	Middle domain of MutM-like DNA repair proteins	19	-4
139	81380	a.157.1.1	Skp1 dimerisation domain-like	36	-28
140	81381	a.158.1.1	F-box domain	23	-6
141	81600	a.159.1.1	Protein serine/threonine phosphatase 2C, C-terminal domain	17	-10
142	81699	a.159.2.1	FF domain	13	-11
143	109716	a.159.4.1	DEK C-terminal domain	9	-11
144	47064	a.16.1.2	Ribosomal protein S15	19	-34
145	47068	a.16.1.3	a tRNA synthase domain	12	-9
146	81630	a.160.1.1	Poly(A) polymerase, PAP, middle domain	44	-21
147	101271	a.160.1.2	2'-5'-oligoadenylate synthetase 1, OAS1, second domain	19	-12
148	101274	a.160.1.3	Archaeal tRNA CCA-adding enzyme substrate-binding domain	4	-2
149	81731	a.161.1.1	beta-catenin-interacting protein ICAT	13	-4
150	81768	a.162.1.1	Pre-protein crosslinking domain of SecA	17	-16
151	81784	a.164.1.1	C-terminal domain of DFF45/ICAD (DFF-C domain)	5	-10
152	81791	a.165.1.1	Myosin phosphatase inhibitor 17kDa protein, CPI-17	7	-16
153	81823	a.166.1.1	RuBisCo LSMT C-terminal, substrate-binding domain	8	-2
154	81828	a.167.1.1 changed to a.223.1.2	Porin chaperone SurA, peptide-binding domain	10	-4
155	81838	a.169.1.1	BEACH domain	35	-30
156	47073	a.17.1.1	p8-MTCP1	10	-4
157	81873	a.170.1.1	BRCA2 helical domain	18	-4
158	81879	a.171.1.1	BRCA2 tower domain	10	-8
159	81887	a.172.1.1	Helical scaffold and wing domains of SecA	14	-8
160	81892	a.173.1.1	Poly A polymerase C-terminal region-like	22	-22
161	81924	a.174.1.1	Double Clp-N motif	12	-11
162	81931	a.175.1.1	Orange carotenoid protein, N-terminal domain	7	-4
163	81936	a.176.1.1	N-terminal domain of bifunctional PutA protein	3	-22
164	88947	a.177.1.1	Sigma2 domain of RNA polymerase sigma factors	51	-24
165	89070	a.180.1.1	N-terminal, cytoplasmic domain of anti-sigmaE factor RseA	2	0
166	89083	a.181.1.1	Antibiotic binding domain of TipA-like multidrug resistance regulators	2	0
167	89096	a.182.1.1	GatB/YqeY domain	16	-66
168	89125	a.183.1.1	Nop domain	19	-21
169	89156	a.184.1.1	TorD-like	10	-4
170	101216	a.186.1.1	Circadian clock protein KaiA, C-terminal domain	2	-4
171	109836	a.186.1.2	Phosphoserine phosphatase RsbU, N-terminal domain	2	0
172	101225	a.187.1.1	HAND domain of the nucleosome remodeling ATPase ISWI	23	-17
173	101234	a.188.1.1	PWI domain	28	-34
174	101239	a.189.1.1	XPC-binding domain	12	-9
175	101263	a.191.1.1	Methenyltetrahydrofolate cyclohydrolase-like	20	0
176	101279	a.192.1.1	N-terminal domain of adenylylcyclase associated protein, CAP	30	-21
177	101284	a.193.1.1	GRIP domain	14	-3
178	101289	a.194.1.1	L27 domain	25	-11
179	101308	a.195.1.1	YutG-like	10	-8
180	101323	a.198.1.1	YcfC-like	4	-8
181	101328	a.199.1.1	YgfB-like	12	-4
182	46558	a.2.1.1	GreA transcript cleavage protein, N-terminal domain	18	-14
183	46610	a.2.11.1	Fe,Mn superoxide dismutase (SOD), N-terminal domain	71	-97
184	109636	a.2.14.1	DnaK suppressor protein DksA, alpha-hairpin domain	6	-4
185	46562	a.2.2.1	Ribosomal protein L29 (L29p)	4	-4
186	46566	a.2.3.1	Chaperone J-domain	90	-77
187	46576	a.2.4.1 changed to a.237.1.1	DNA polymerase III theta subunit-like	2	0
188	46580	a.2.5.1	Prefoldin	7	-1
189	46586	a.2.6.1	HR1 repeat	11	-21
190	46590	a.2.7.1	Seryl-tRNA synthetase (SerRS)	2	0
191	46597	a.2.8.1	Eukaryotic DNA topoisomerase I, dispensable insert domain	9	-10
192	63427	a.20.1.2	MMP N-terminal domain	18	-9
193	101333	a.200.1.1	Hypothetical protein MTH393	2	-2
194	101354	a.203.1.1	Putative anticodon-binding domain of alanyl-tRNA synthetase (AlaRS)	29	-35
195	101387	a.204.1.1	Type II deoxyuridine triphosphatase	8	0
196	101392	a.205.1.1	Hsp90 co-chaperone CDC37	21	-6
197	101400	a.206.1.1	P40 nucleoprotein	4	0
198	101448	a.207.1.1	Formin homology 2 domain (FH2 domain)	45	-37
199	101474	a.208.1.1	DhaL-like	58	-16
200	101479	a.209.1.1	ADP-ribosylglycohydrolase	49	-4
201	47096	a.21.1.1	HMG-box	53	-27
202	101490	a.210.1.1	Eukaryotic initiation factor 4f subunit eIF4g, eIF4e-binding domain	3	-4
203	101340	a.211.1.1	HD domain	37	-19
204	48548	a.211.1.2	PDEase	53	-28
205	109855	a.213.1.1	YfiT-like putative metal-dependent hydrolases	12	-2
206	109860	a.214.1.1	NblA-like	2	0
207	109881	a.215.1.1	A middle domain of Talin 1	19	-16
208	109886	a.216.1.1	I/LWEQ domain	26	-18
209	109906	a.217.1.1	Surp module (SWAP domain)	7	-8
210	109916	a.219.1.1	Hypothetical protein YhaI	2	0
211	47114	a.22.1.1	Nucleosome core histones	79	-61
212	47134	a.22.1.3	TBP-associated factors, TAFs	49	-36
213	109921	a.220.1.1	Hypothetical protein At3g22680	7	-2
214	109926	a.221.1.1	Lissencephaly-1 protein (Lis-1, PAF-AH alpha) N-terminal domain	16	-24
215	109994	a.222.1.1	VPS9 domain	35	-20
216	109999	a.223.1.1	TF C-terminus	4	0
217	110005	a.224.1.1	Glycolipid transfer protein, GLTP	32	-22
218	110015	a.226.1.1	Her-1	3	0
219	110020	a.227.1.1	ERO1-like	27	-30
220	110036	a.228.1.1	GDNF receptor-like	20	-16
221	47149	a.23.2.1	Diol dehydratase, gamma subunit	14	0
222	47158	a.23.4.1	Mitochondrial import receptor subunit Tom20	14	-21
223	68990	a.23.5.1	Hemolysin expression modulating protein HHA	2	0
224	47163	a.24.1.1	Apolipoprotein	16	-14
225	47227	a.24.10.1	Aerobic respiration control sensor protein, ArcB	2	0
226	47230	a.24.10.2	Phosphorelay protein-like	2	-2
227	63512	a.24.10.3	Chemotaxis protein CheA P1 domain	22	0
228	47365	a.24.13.1	Domain of the SRP/SRP receptor G-proteins	17	-4
229	68994	a.24.14.1	FAT domain of focal adhesion kinase	31	-15
230	69001	a.24.15.1	FAD-dependent thiol oxidase	17	-37
231	81740	a.24.16.2	Family 1 bi-partite nucleotidyltransferase subunit	2	-2
232	89022	a.24.16.3	HEPN domain	25	0
233	109767	a.24.16.4	Glutamine synthase adenylyltransferase GlnE, domain 2	10	-4
234	101113	a.24.18.1	Oxygen-evolving enhancer protein 3,	6	-1
235	101117	a.24.19.1	Flagellar export chaperone FliS	10	-2
236	47171	a.24.2.1	Aspartate receptor, ligand-binding domain	3	0
237	69009	a.24.21.1	RecG, N-terminal domain	2	0
238	109771	a.24.22.1	Nickel-containing superoxide dismutase, NiSOD	10	0
239	109776	a.24.23.1	Mannose-6-phosphate receptor binding protein 1 (Tip47), C-terminal domain	16	-12
240	109780	a.24.24.1	Domain from hypothetical 2610208m17rik protein	23	-2
241	47176	a.24.3.1	Cytochrome b562	2	0
242	47179	a.24.3.2	Cytochrome c'-like	26	-10
243	47213	a.24.7.1	FKBP12-rapamycin-binding domain of FKBP-rapamycin-associated protein (FRAP)	22	-31
244	47217	a.24.8.1	Proteasome activator	17	-13
245	47221	a.24.9.1	alpha-catenin/vinculin	29	-24
246	47241	a.25.1.1	Ferritin	138	-125
247	47253	a.25.1.2	Ribonucleotide reductase-like	101	-52
248	100951	a.25.1.3	Manganese catalase (T-catalase)	40	-5
249	89029	a.25.2.1	Hypothetical protein Ta1238	2	0
250	89032	a.25.2.2	Cobalamin adenosyltransferase	55	-50
251	47267	a.26.1.1	Long-chain cytokines	22	-12
252	47286	a.26.1.2	Short-chain cytokines	16	-12
253	47305	a.26.1.3	Interferons/interleukin-10 (IL-10)	22	-17
254	47324	a.27.1.1	Anticodon-binding domain of a subclass of class I aminoacyl-tRNA synthetases	80	-75
255	47337	a.28.1.1	Acyl-carrier protein (ACP)	18	-12
256	47346	a.28.2.1	Colicin E immunity proteins	4	0
257	47371	a.29.2.1	Bromodomain	36	-33
258	47204	a.29.3.1	Medium chain acyl-CoA dehydrogenase-like, C-terminal domain	141	-125
259	74714	a.29.3.2	acyl-CoA oxidase C-terminal domains	62	-57
260	69013	a.29.5.1	alpha-ketoacid dehydrogenase kinase, N-terminal domain	41	-24
261	101149	a.29.6.1	Plant invertase/pectin methylesterase inhibitor	7	0
262	101153	a.29.7.1	Mob1/phocein	30	-35
263	46627	a.3.1.1	monodomain cytochrome c	77	-35
264	46671	a.3.1.2	N-terminal (heme c) domain of cytochrome cd1-nitrite reductase	18	-2
265	46676	a.3.1.3	Cytochrome bc1 domain	29	-29
266	46680	a.3.1.4	Two-domain cytochrome c	5	-2
267	46685	a.3.1.5	Di-heme cytochrome c peroxidase	100	-18
268	68952	a.3.1.6	Quinoprotein alcohol dehydrogenase, C-terminal domain	5	0
269	68956	a.3.1.7	Quinohemoprotein amine dehydrogenase A chain, domains 1 and 2	6	-3
270	81677	a.3.1.8	Di-heme cytochrome c SoxA	9	0
271	47385	a.30.2.1	Homodimeric domain of signal transducing histidine kinase	6	0
272	101161	a.30.4.1	Dimerisation domain of CENP-B	7	-4
273	47397	a.32.1.1	Transcription factor IIA (TFIIA), alpha-helical domain	20	-10
274	109806	a.34.4.1	Adapter protein APS, dimerisation domain	7	-4
275	47414	a.35.1.1	POU-specific domain	26	-13
276	47435	a.35.1.4	Cyanase N-terminal domain	4	0
277	47447	a.36.1.1	Signal peptide-binding domain	52	-60
278	47455	a.37.1.1	A DNA-binding domain in eukaryotic transcription factors	7	0
279	47460	a.38.1.1	HLH, helix-loop-helix DNA-binding domain	41	-11
280	47478	a.39.1.2	S100 proteins	16	-20
281	47489	a.39.1.3	Osteonectin	20	-6
282	47492	a.39.1.4	Parvalbumin	18	-15
283	47502	a.39.1.5	Calmodulin-like	50	-22
284	47543	a.39.1.6	Eps15 homology domain (EH domain)	24	-19
285	47547	a.39.1.7	EF-hand modules in multidomain proteins	32	-17
286	63550	a.39.1.8	Penta-EF-hand proteins	37	-26
287	47566	a.39.2.1	Insect pheromone/odorant-binding proteins	9	-5
288	69026	a.39.4.1	Hypothetical protein MTH865	8	0
289	46690	a.4.1.1	Homeodomain	34	-19
290	100918	a.4.1.12	FIS-like	5	-2
291	100998	a.4.1.13	SLIDE domain	34	-29
292	46739	a.4.1.3	Myb/SANT domain	17	-14
293	46745	a.4.1.4	DNA-binding domain of telomeric protein	15	0
294	46748	a.4.1.5	Paired domain	25	-14
295	46753	a.4.1.6	DNA-binding domain of rap1	3	-3
296	46756	a.4.1.7	Centromere-binding	11	-3
297	46759	a.4.1.8	AraC type transcriptional activator	3	0
298	46764	a.4.1.9	Tetracyclin repressor-like, N-terminal domain	10	-2
299	46925	a.4.11.1	RNA polymerase subunit RPB10	33	-35
300	48296	a.4.12.1	Trp repressor, TrpR	2	0
301	81695	a.4.12.2	Chromosomal replication initiation factor DnaA C-terminal domain IV	16	-4
302	88665	a.4.13.2	Sigma4 domain	13	0
303	109706	a.4.13.3	YlxM/p13-like	4	-6
304	46768	a.4.2.1	Methylated DNA-protein cysteine methyltransferase, C-terminal domain	74	-28
305	46775	a.4.3.1	ARID domain	24	-19
306	46786	a.4.5.1	Biotin repressor-like	4	0
307	46816	a.4.5.10	Replication initiation protein	10	0
308	46819	a.4.5.11	Helicase DNA-binding domain	6	0
309	46827	a.4.5.13	Linker histone H1/H5	32	-29
310	46832	a.4.5.14	Forkhead DNA-binding domain	35	-20
311	46841	a.4.5.15	DNA-binding domain from rap30	19	-11
312	46844	a.4.5.16	C-terminal domain of RPA32	9	-6
313	46847	a.4.5.17	Cell cycle transcription factor e2f-dp	34	-20
314	46850	a.4.5.18	The central core domain of TFIIE beta	20	-16
315	46853	a.4.5.19	Z-DNA binding domain	7	0
316	46789	a.4.5.2	LexA repressor, N-terminal DNA-binding domain	2	0
317	46856	a.4.5.20	P4 origin-binding domain-like	22	-15
318	46859	a.4.5.21	ets domain	25	-18
319	46873	a.4.5.22	Heat-shock transcription factor	24	-22
320	46877	a.4.5.23	Interferon regulatory factor	24	-5
321	46882	a.4.5.24	Iron-dependent repressor protein	2	-4
322	46887	a.4.5.25	Methionine aminopeptidase, insert domain	35	-17
323	63379	a.4.5.28	MarR-like transcriptional regulators	17	-4
324	63475	a.4.5.29	Plant O-methyltransferase, N-terminal domain	16	-2
325	46792	a.4.5.3	Arginine repressor (ArgR), N-terminal DNA-binding domain	6	-2
326	63480	a.4.5.30	C-terminal domain of the rap74 subunit of TFIIF	10	-14
327	63483	a.4.5.31	DEP domain	20	-17
328	74676	a.4.5.33	Transcriptional regulator IclR, N-terminal domain	2	0
329	74679	a.4.5.34	SCF ubiquitin ligase complex WHB domain	50	-21
330	81690	a.4.5.36	DNA-binding protein Mj223	2	0
331	88979	a.4.5.37	LysR-like transcriptional regulators	5	0
332	46796	a.4.5.4	CAP C-terminal domain-like	6	0
333	101021	a.4.5.40	N-terminal domain of Bacillus PurR	2	-4
334	101027	a.4.5.42	FUR-like	5	0
335	101048	a.4.5.45	Dissimilatory sulfite reductase DsvD	2	0
336	101051	a.4.5.46	La domain	21	-16
337	109671	a.4.5.47	PCI domain (PINT motif)	13	-18
338	109683	a.4.5.51	Heat-inducible transcription repressor HrcA, N-terminal domain	2	-2
339	109686	a.4.5.52	DNA replication factor Cdt1	13	-5
340	109689	a.4.5.53	Eukaryotic translation initiation factor 3 subunit 12, eIF3k, C-terminal domain	10	-25
341	109692	a.4.5.54	Vacuolar sorting protein domain	11	-6
342	109699	a.4.5.55	Transcriptional regulator Rrf2	9	0
343	46804	a.4.5.6	GntR-like transcriptional regulators	4	-2
344	46807	a.4.5.7	Replication terminator protein (RTP)	4	0
345	46810	a.4.5.8	N-terminal domain of molybdate-dependent transcriptional regulator ModE	4	-4
346	46895	a.4.6.1	PhoB-like	16	0
347	46900	a.4.6.2	GerE-like (LuxR/UhpA family of transcriptional regulators)	5	0
348	46903	a.4.6.3	Spo0A	6	-2
349	46907	a.4.7.1	Ribosomal protein L11, C-terminal domain	34	-14
350	46916	a.4.9.1	Polynucleotide phosphorylase/guanosine pentaphosphate synthase (PNPase/GPSI), domain 3	8	-2
351	47577	a.40.1.1	Calponin-homology domain, CH-domain	47	-20
352	47588	a.41.1.1	Domain of poly(ADP-ribose) polymerase	39	-20
353	47593	a.42.1.1	SWIB/MDM2 domain	31	-18
354	100972	a.43.1.5	Met repressor, MetJ (MetR)	2	0
355	47617	a.45.1.1	Glutathione S-transferase (GST), C-terminal domain	106	-69
356	47645	a.46.1.1	Methionine synthase domain	43	-32
357	47649	a.46.2.1	Nucleoside phosphorylase/phosphoribosyltransferase N-terminal domain	27	-11
358	47656	a.47.1.1	STAT	17	-11
359	47662	a.47.2.1	t-snare proteins	47	-33
360	109844	a.47.4.1	CAPPD, an extracellular domain of amyloid beta A4 protein	18	-14
361	47669	a.48.1.1	N-terminal domain of cbl (N-cbl)	19	-18
362	47673	a.48.2.1	Transferrin receptor-like dimerisation domain	13	-11
363	47677	a.48.3.1	Conserved domain common to transcription factors TFIIS, elongin A, CRSP70	2	-2
364	109737	a.5.10.1	FGAM synthase PurL, linker domain	18	-8
365	46935	a.5.2.1	UBA domain	14	-4
366	68973	a.5.2.3	TAP-C domain-like	8	-4
367	88995	a.5.2.4	CUE domain	4	-2
368	46939	a.5.3.1	CRAL/TRIO N-terminal domain	19	-11
369	46943	a.5.4.1	Elongation factor TFIIS domain 2	2	-2
370	89001	a.5.7.1	DmpG/LeuA communication domain-like	2	0
371	109725	a.5.7.2	Conserved carboxylase domain	50	-16
372	109729	a.5.8.1	Hypothetical protein AF0491, middle domain	8	-6
373	109733	a.5.9.1	HBS1-like domain	15	-8
374	47687	a.50.1.1	Anaphylotoxins (complement system)	4	-8
375	47695	a.51.1.1	Cytochrome c oxidase subunit h	21	-29
376	47700	a.52.1.1	Plant lipid-transfer and hydrophobic proteins	13	-8
377	47708	a.52.1.2	Proteinase/alpha-amylase inhibitors	2	-2
378	47730	a.55.1.1	Prokaryotic DNA-bending protein	71	-25
379	47742	a.56.1.1	CO dehydrogenase ISP C-domain like	78	-37
380	47758	a.58.1.1	Chemotaxis receptor methyltransferase CheR, N-terminal domain	2	0
381	47763	a.59.1.1	PAH2 domain	31	-9
382	46959	a.6.1.2	DNA repair factor XPA DNA- and RPA-binding domain, C-terminal subdomain	13	-18
383	46962	a.6.1.3	DNA-binding N-terminal domain of transcription activators	32	-4
384	74693	a.6.1.4	Dachshund-homology domain	23	-25
385	74696	a.6.1.5	Terminase gpNU1 subunit domain	4	0
386	47770	a.60.1.1	Pointed domain	32	-15
387	47773	a.60.1.2	SAM (sterile alpha motif) domain	29	-25
388	47832	a.60.10.1	Enzyme I of the PEP:sugar phosphotransferase system HPr-binding (sub)domain	6	0
389	69048	a.60.11.1	Hypothetical protein YjbJ	18	0
390	81584	a.60.12.1	DNA polymerase beta-like, second domain	16	-10
391	81800	a.60.13.1	Putative methyltransferase TM0872, insert domain	38	-6
392	47782	a.60.2.1	DNA helicase RuvA subunit, middle domain	4	0
393	47786	a.60.2.2	NAD+-dependent DNA ligase, domain 3	17	-32
394	47790	a.60.3.1	C-terminal domain of RNA polymerase alpha subunit	13	-4
395	47795	a.60.4.1	DNA repair protein Rad51, N-terminal domain	12	-8
396	47799	a.60.5.1	Barrier-to-autointegration factor, BAF	23	-16
397	47803	a.60.6.1	DNA polymerase beta, N-terminal domain-like	24	-13
398	47808	a.60.7.1	5' to 3' exonuclease, C-terminal subdomain	17	-10
399	47820	a.60.8.1	HRDC domain from helicases	2	-2
400	69044	a.60.8.2	RNA polymerase II subunit RBP4 (RpoF)	2	0
401	47824	a.60.9.1	lambda integrase-like, N-terminal domain	6	-2
402	47863	a.64.1.1	NKL-like	8	0
403	47866	a.64.1.2	Swaposin	7	-4
404	81806	a.64.1.3	Saposin B	16	-10
405	47875	a.65.1.1	Annexin	47	-41
406	47896	a.66.1.1	Transducin (alpha subunit), insertion domain	33	-24
407	47913	a.68.1.1	Wiscott-Aldrich syndrome protein, WASP, C-terminal domain	18	-15
408	47918	a.69.1.1	C-terminal domain of alpha and beta subunits of F1 ATP synthase	75	-39
409	47924	a.69.2.1	Ypt/Rab-GAP domain of gyp1p	32	-26
410	69056	a.69.3.1	1-deoxy-D-xylulose-5-phosphate reductoisomerase, C-terminal domain	12	0
411	46967	a.7.1.1	Spectrin repeat	33	-16
412	109752	a.7.11.1	Alpha-hemoglobin stabilizing protein AHSP	4	-12
413	109756	a.7.12.1	PhoU-like	49	-26
414	46974	a.7.2.1	Enzyme IIa from lactose specific PTS, IIa-lac	4	0
415	46978	a.7.3.1	Succinate dehydrogenase/fumarate reductase flavoprotein C-terminal domain	78	-27
416	46985	a.7.4.1	Smac/diablo	13	-8
417	46989	a.7.5.1	Tubulin chaperone cofactor A	19	-21
418	46993	a.7.6.1	Ribosomal protein S20	2	0
419	63492	a.7.7.1	BAG domain	15	-12
420	89010	a.7.8.1	GAT domain	28	-13
421	100929	a.7.8.2	Phosphoinositide-binding clathrin adaptor, domain 2	33	-15
422	47929	a.70.1.1	N-terminal domain of the delta subunit of the F1F0-ATP synthase	2	0
423	47934	a.71.1.1	ERP29 C domain-like	8	-12
424	81812	a.71.2.1	Helical domain of Sec23/24	34	-21
425	47939	a.72.1.1	Functional domain of the splicing factor Prp18	6	-2
426	47955	a.74.1.1	Cyclin	53	-28
427	47965	a.74.1.2	Transcription factor IIB (TFIIB), core domain	51	-16
428	47969	a.74.1.3	Retinoblastoma tumor suppressor domains	36	-19
429	47974	a.75.1.1	Ribosomal protein S7	39	-25
430	47980	a.76.1.1	Iron-dependent repressor protein, dimerization domain	7	-2
431	81312	a.77.1.2	DEATH domain, DD	13	-16
432	81313	a.77.1.3	Caspase recruitment domain, CARD	14	-19
433	81388	a.77.1.4	DEATH effector domain, DED	13	-12
434	101298	a.77.1.5	Pyrin domain, PYD	15	-11
435	48009	a.78.1.1	GntR ligand-binding domain-like	2	0
436	48014	a.79.1.1	Antitermination factor NusB	10	-6
437	109930	a.79.1.3	RmsB N-terminal domain-like	6	-2
438	88693	a.8.3.1	alpha-mannosidase, domain 2	32	-13
439	89013	a.8.3.2	4-alpha-glucanotransferase, domain 2	4	0
440	100935	a.8.4.1	Heat shock protein 70kD (HSP70), C-terminal subdomain	51	-27
441	48020	a.80.1.1	DNA polymerase III clamp loader subunits, C-terminal domain	40	-36
442	48025	a.81.1.1	N-terminal domain of DnaB helicase	44	-12
443	48035	a.83.1.1	Guanido kinase N-terminal domain	30	-28
444	48057	a.86.1.1	Hemocyanin middle domain	15	-9
445	48061	a.86.1.2	Catechol oxidase	12	-6
446	48066	a.87.1.1	DBL homology domain (DH-domain)	43	-33
447	48077	a.88.1.1	LigA subunit of an aromatic-ring-opening dioxygenase LigAB	15	0
448	48082	a.89.1.1	Methyl-coenzyme M reductase alpha and beta chain C-terminal domain	11	-5
449	48093	a.90.1.1	Transcription factor STAT-4 N-domain	16	-17
450	48098	a.91.1.1	Regulator of G-protein signaling, RGS	29	-15
451	48109	a.92.1.1	Carbamoyl phosphate synthetase, large subunit connection domain	59	-58
452	48114	a.93.1.1	CCP-like	33	-22
453	48132	a.93.1.2	Myeloperoxidase-like	67	-32
454	74753	a.93.1.3	Catalase-peroxidase KatG	121	-70
455	48141	a.94.1.1	Ribosomal protein L19 (L19e)	22	-12
456	48151	a.96.1.1	Endonuclease III	31	-30
457	48154	a.96.1.2	Mismatch glycosylase	61	-46
458	48157	a.96.1.3	DNA repair glycosylase, 2 C-terminal domains	30	-42
459	74756	a.96.1.4	3-Methyladenine DNA glycosylase I (Tag)	53	-32
460	101349	a.96.1.5	3-Methyladenine DNA glycosylase III (MagIII)	2	0
461	48164	a.97.1.1	C-terminal domain of glutamyl-tRNA synthetase (GluRS)	4	0
462	74759	a.97.1.2	C-terminal domain of class I lysyl-tRNA synthetase	8	0
463	48169	a.98.1.1	R1 subunit of ribonucleotide reductase, N-terminal domain	35	-14
464	48174	a.99.1.1	Cryptochrome/photolyase FAD-binding domain	94	-119
465	48727	b.1.1.1	V set domains (antibody variable domain-like)	37	-31
466	48942	b.1.1.2	C1 set domains (antibody constant domain-like)	28	-23
467	49142	b.1.1.3	C2 set domains	16	-17
468	49159	b.1.1.4	I set domains	39	-14
469	49349	b.1.10.1	Alpha-adaptin ear subdomain-like	15	-18
470	74857	b.1.10.2	gamma-adaptin C-terminal appendage domain-like	33	-16
471	101536	b.1.10.3	Coatomer appendage domain	31	-19
472	49355	b.1.11.1	Pilus chaperone	16	-2
473	49360	b.1.11.2	MSP-like	13	0
474	49364	b.1.12.1	Purple acid phosphatase, N-terminal domain	7	-5
475	49368	b.1.13.1	Superoxide reductase-like	24	-14
476	69180	b.1.15.1	Integrin domains	26	-10
477	74854	b.1.16.1	Lamin A/C globular tail domain	26	-9
478	74864	b.1.17.1	Thiol:disulfide interchange protein DsbD, N-terminal domain (DsbD-alpha)	8	-8
479	81279	b.1.18.1	NF-kappa-B/REL/DORSAL transcription factors, C-terminal domain	27	-21
480	81291	b.1.18.11	Arrestin/Vps26-like	33	-14
481	81294	b.1.18.14	Quinohemoprotein amine dehydrogenase A chain, domains 4 and 5	10	-2
482	81966	b.1.18.16	Cytoplasmic domain of inward rectifier potassium channel	37	-14
483	81969	b.1.18.17	Copper resistance protein C (CopC, PcoC)	7	-2
484	89191	b.1.18.18	Other IPT/TIG domains	8	-17
485	81282	b.1.18.2	E-set domains of sugar-utilizing enzymes	65	-6
486	81283	b.1.18.3	Arthropod hemocyanin, C-terminal domain	11	-8
487	81286	b.1.18.6	Molybdenum-containing oxidoreductases-like dimerisation domain	22	-38
488	81287	b.1.18.7	ML domain	14	-22
489	81288	b.1.18.8	RhoGDI-like	39	-18
490	81289	b.1.18.9	Transglutaminase N-terminal domain	23	-13
491	81983	b.1.19.1	Antigen MPT63/MPB63 (immunoprotective extracellular protein)	3	-6
492	49266	b.1.2.1	Fibronectin type III	49	-16
493	101543	b.1.21.1	Fungal immunomodulatory protein, FIP	5	0
494	101547	b.1.22.1	ASF1-like	26	-10
495	110070	b.1.23.1	ApaG-like	10	-26
496	49300	b.1.3.1	PKD domain	18	-6
497	49304	b.1.4.1	beta-Galactosidase/glucuronidase domain	23	-17
498	49310	b.1.5.1	Transglutaminase, two C-terminal domains	20	-13
499	49314	b.1.6.1	Cadherin	19	-8
500	110062	b.1.6.2	Dystroglycan, N-terminal domain	8	-10
501	49330	b.1.8.1	Cu,Zn superoxide dismutase-like	98	-73
502	49345	b.1.9.1	Cytochrome domain of cellobiose dehydrogenase	19	-2
503	63677	b.1.9.2	Family 9 carbohydrate-binding module, CBD9	7	-2
504	101533	b.1.9.3	Glucodextranase, domain C	6	0
505	63818	b.100.1.1	Sortase	8	-4
506	63878	b.102.1.1	Methuselah ectodomain	14	-8
507	63883	b.103.1.1	MoeA N-terminal region -like	97	-79
508	63888	b.104.1.1	P-domain of calnexin/calreticulin	39	-24
509	69190	b.105.1.1	PBP5 C-terminal domain-like	7	-8
510	69361	b.109.1.1	Cell wall binding repeat	12	0
511	49696	b.11.1.1	Crystallins/Ca-binding development proteins	23	-13
512	74983	b.111.1.1	Small protein B (SmpB)	10	-4
513	81623	b.113.1.1	N-terminal domain of MutM-like DNA repair proteins	38	-16
514	82027	b.115.1.1	Calcium-mediated lectin	9	0
515	82052	b.117.1.1	Obg GTP-binding protein N-terminal domain	25	-38
516	82154	b.118.1.1	FAS1 domain	32	-8
517	82216	b.119.1.1	C-terminal autoproteolytic domain of nucleoporin nup98	41	-26
518	49724	b.12.1.1	Lipoxigenase N-terminal domain	24	-11
519	49730	b.12.1.2	Colipase-binding domain	14	-12
520	49738	b.12.1.3	Alpha-toxin, C-terminal domain	4	0
521	49746	b.121.1.2	Peptidylglycine alpha-hydroxylating monooxygenase, PHM	30	-22
522	69204	b.121.3.1	Nucleoplasmin-like core domain	29	-14
523	88698	b.122.1.1	PUA domain	27	-26
524	89451	b.122.1.2	YggJ N-terminal domain-like	2	0
525	63801	b.122.1.3	ATP sulfurylase N-terminal domain	50	-21
526	110339	b.122.1.4	Hypothetical protein EF3133	14	-10
527	89233	b.123.1.1	Hypothetical protein TM1070	2	0
528	89361	b.124.1.1	HesB-like domain	21	-6
529	89393	b.125.1.1	Outer-membrane lipoproteins carrier protein LolA	4	0
530	89396	b.125.1.2	Outer membrane lipoprotein receptor LolB	2	-2
531	89443	b.128.1.1	Hypothetical protein YojF	2	0
532	100921	b.130.1.1	Heat shock protein 70kD (HSP70), peptide-binding domain	95	-49
533	100940	b.131.1.1	Ku70 subunit middle domain	38	-21
534	100943	b.131.1.2	Ku80 subunit middle domain	26	-14
535	101856	b.131.1.3	SPOC domain	17	-19
536	101577	b.132.1.1	Supernatant protein factor (SPF), C-terminal domain	18	-14
537	101739	b.136.1.1	Stringent starvation protein B, SspB	5	-4
538	101745	b.137.1.1	RNase P subunit p29-like	4	0
539	101802	b.139.1.1	Surface presentation of antigens (SPOA)	28	-24
540	49759	b.14.1.1	Calpain large subunit, middle domain (domain III)	38	-20
541	101942	b.143.1.1	NAC domain	15	-3
542	102032	b.145.1.1	AXH domain	21	-23
543	110112	b.146.1.1	Ctag/Cox11	46	-32
544	49765	b.15.1.1	HSP20	13	-10
545	49768	b.15.1.2	Co-chaperone p23-like	17	-8
546	101580	b.15.1.3	GS domain	10	-9
547	49773	b.16.1.1	Ecotin, trypsin inhibitor	20	-4
548	49778	b.17.1.1	Phosphatidylethanolamine binding protein	32	-23
549	63701	b.17.1.2	Prokaryotic PEBP-like proteins	45	-13
550	49786	b.18.1.1	Galactose-binding domain	5	-6
551	69213	b.18.1.10	Family 6 carbohydrate binding module, CBM6	22	0
552	69222	b.18.1.13	PepX C-terminal domain-like	50	0
553	74893	b.18.1.14	CBM4/9	5	0
554	74896	b.18.1.15	Fucose binding lectin	19	-8
555	89241	b.18.1.18	Family 27 carbohydrate binding module, CBM27	2	0
556	49791	b.18.1.2	Discoidin domain (FA58C, coagulation factor 5/8 C-terminal domain)	33	-12
557	89249	b.18.1.20	Proprotein convertase P-domain	26	-30
558	101585	b.18.1.21	F-box associated region, FBA	31	-10
559	101588	b.18.1.22	Allantoicase repeat	83	-33
560	110128	b.18.1.25	Rhamnogalacturonase B, RhgB, C-terminal domain	14	-2
561	49800	b.18.1.4	Ephrin receptor ligand binding domain	36	-18
562	49803	b.18.1.5	beta-Galactosidase/glucuronidase, N-terminal domain	96	-48
563	49814	b.18.1.8	N-terminal domain of xrcc1	18	-13
564	69210	b.18.1.9	APC10-like	12	-13
565	110088	b.2.10.1	DR1885-like metal-binding protein	2	0
566	49385	b.2.2.1	Cellulose-binding domain family II	18	-3
567	49390	b.2.2.2	Cellulose-binding domain family III	38	-3
568	49398	b.2.2.3	Bacterial chitobiase, n-terminal domain	4	-2
569	49411	b.2.4.1	Alpha-macroglobulin receptor domain	18	-18
570	81314	b.2.5.2	p53 DNA-binding domain-like	24	-13
571	81315	b.2.5.3	Rel/Dorsal transcription factors, DNA-binding domain	22	-17
572	81316	b.2.5.4	T-box	30	-9
573	81317	b.2.5.5	STAT DNA-binding domain	25	-21
574	81318	b.2.5.6	RUNT domain	25	-13
575	81992	b.2.5.7	DNA-binding domain from NDT80	7	-2
576	110080	b.2.5.8	DNA-binding protein LAG-1 (CSL)	22	-20
577	49442	b.2.6.1	Cytochrome f, large domain	19	-8
578	49448	b.2.7.1	Second domain of Mu2 adaptin subunit (ap50) of ap2 adaptor	36	-25
579	81996	b.2.8.1	beta-sandwich domain of Sec23/24	14	-1
580	110084	b.2.9.1	Peptidylarginine deiminase Pad4, middle domain	10	-19
581	49843	b.22.1.1	TNF-like	27	-5
582	49855	b.23.1.1	Spermadhesin, CUB domain	27	-13
583	89261	b.23.2.1	Collagen-binding domain	6	0
584	49871	b.25.1.1	Osmotin, thaumatin-like protein	34	-15
585	49880	b.26.1.1	SMAD domain	31	-8
586	49885	b.26.1.2	FHA domain	36	-11
587	101630	b.26.1.3	Interferon regulatory factor 3 (IRF3), transactivation domain	19	-9
588	49900	b.29.1.1	Legume lectins	13	-7
589	49971	b.29.1.10	Glycosyl hydrolase family 7 catalytic core	31	-3
590	49978	b.29.1.11	Xylanase/endoglucanase 11/12	52	-14
591	69236	b.29.1.12	Calnexin/calreticulin	37	-32
592	74904	b.29.1.13	Lectin leg-like	24	-26
593	101643	b.29.1.16	Thrombospondin C-terminal domain	21	-17
594	101646	b.29.1.17	Hypothetical protein YesU	6	-2
595	101649	b.29.1.18	Alginate lyase	20	0
596	101652	b.29.1.19	Glycosyl hydrolases family 32 C-terminal domain	2	0
597	49925	b.29.1.2	Glycosyl hydrolases family 16	41	-8
598	101656	b.29.1.20	Peptidase A4	21	-6
599	110143	b.29.1.21	Alpha-L-arabinofuranosidase B, N-terminal domain	16	0
600	49932	b.29.1.3	Galectin (animal S-lectin)	34	-13
601	49944	b.29.1.4	Laminin G-like module	27	-11
602	49951	b.29.1.5	Pentraxin (pentaxin)	21	-17
603	49453	b.3.1.1	Starch-binding domain	21	-5
604	110091	b.3.1.2	Rhamnogalacturonase B, RhgB, middle domain	7	-2
605	49465	b.3.2.1	Carboxypeptidase regulatory domain	14	-11
606	49469	b.3.3.1	VHL	9	-11
607	49473	b.3.4.1	Transthyretin (synonym: prealbumin)	12	-2
608	49483	b.3.6.1	Aromatic compound dioxygenase	92	-40
609	49999	b.30.2.1	Amine oxidase catalytic domain	74	-55
610	49995	b.30.5.1	beta-Galactosidase, domain 5	23	-4
611	110151	b.30.5.10	Rhamnogalacturonase B, RhgB, N-terminal domain	15	-2
612	50006	b.30.5.2	Hyaluronate lyase-like, central domain	21	-2
613	63733	b.30.5.3	Glycosyltransferase family 36 N-terminal domain	43	-28
614	74911	b.30.5.4	Aldose 1-epimerase (mutarotase)	124	-67
615	82042	b.30.5.5	Bacterial glucoamylase N-terminal domain-like	33	-4
616	88656	b.30.5.6	alpha-mannosidase, C-terminal domain	40	-38
617	89279	b.30.5.7	Hypothetical protein HI1317	34	-16
618	89286	b.30.5.8	4-alpha-glucanotransferase, C-terminal domain	4	0
619	110148	b.30.5.9	MdoG-like	60	-18
620	50023	b.33.1.1	Rieske iron-sulfur protein (ISP)	68	-34
621	50033	b.33.1.2	Ring hydroxylating alpha subunit ISP domain	32	-6
622	50041	b.34.1.2	FeoA-like	4	-2
623	74925	b.34.10.1	Cap-Gly domain	35	-22
624	82058	b.34.11.1	GW domain	6	0
625	82062	b.34.12.1	BAH domain	3	-3
626	54161	b.34.13.1	Histone-like proteins from archaea	4	-1
627	54165	b.34.13.2	Chromo domain	28	-24
628	101691	b.34.14.1	PAZ domain	46	-16
629	101698	b.34.15.1	Hypothetical protein YfhH	2	0
630	50045	b.34.2.1	SH3-domain	44	-24
631	50085	b.34.3.1	Myosin S1 fragment, N-terminal domain	15	0
632	50094	b.34.4.2	Photosystem I accessory protein E (PsaE)	7	-2
633	50098	b.34.4.3	Ferredoxin thioredoxin reductase (FTR), alpha (variable) chain	2	-2
634	50101	b.34.4.4	Nitrile hydratase beta chain	14	-2
635	50105	b.34.5.1	Ribosomal proteins L24p and L21e	3	0
636	50110	b.34.5.2	eIF5a N-terminal domain-like	38	-5
637	50114	b.34.5.3	C-terminal domain of ribosomal protein L2	100	-48
638	82075	b.34.6.2	Kid/PemK	17	-6
639	63434	b.34.8.1	Fumarylacetoacetate hydrolase, FAH, N-terminal domain	33	-23
640	63749	b.34.9.1	Tudor domain	21	-18
641	69250	b.34.9.2	PWWP domain	24	-20
642	89299	b.34.9.3	MBT repeat	29	-25
643	50130	b.35.1.1	GroES	46	-24
644	50136	b.35.1.2	Alcohol dehydrogenase-like, N-terminal domain	178	-171
645	50157	b.36.1.1	PDZ domain	31	-9
646	50172	b.36.1.2	Interleukin 16	13	-8
647	74933	b.36.1.4	HtrA-like serine proteases	9	-10
648	50183	b.38.1.1	Sm motif of small nuclear ribonucleoproteins, SNRNP	53	-43
649	74939	b.38.1.2	Pleiotropic translational regulator Hfq	6	-10
650	82090	b.38.1.3	Mechanosensitive channel protein MscS (YggB), middle domain	2	0
651	50194	b.39.1.1	Ribosomal protein L14	42	-18
652	49494	b.4.1.1	HSP40/DnaJ peptide-binding domain	7	-9
653	50200	b.40.1.1	Staphylococcal nuclease	7	0
654	101757	b.40.10.1	Hypothetical protein YgiW	4	0
655	50243	b.40.3.1	Tissue inhibitor of metalloproteinases, TIMP	15	-8
656	63767	b.40.3.2	The laminin-binding domain of agrin	14	-10
657	89320	b.40.3.3	Netrin-like domain (NTR/C345C module)	5	-12
658	50250	b.40.4.1	Anticodon-binding domain	49	-32
659	89332	b.40.4.11	DNA replication initiator (cdc21/cdc54) N-terminal domain	27	-14
660	50259	b.40.4.2	DNA helicase RuvA subunit, N-terminal domain	8	0
661	50263	b.40.4.3	Single strand DNA-binding domain, SSB	66	-64
662	50277	b.40.4.4	Myf domain	100	-42
663	50282	b.40.4.5	Cold shock DNA-binding domain-like	104	-83
664	50307	b.40.4.6	DNA ligase/mRNA capping enzyme postcatalytic domain	14	-2
665	50321	b.40.4.8	RNA polymerase subunit RBP8	19	-18
666	69259	b.40.4.9	RecG "wedge" domain	2	0
667	50325	b.40.5.1	Inorganic pyrophosphatase	73	-42
668	50338	b.40.6.3	ABC-transporter additional domain	6	-2
669	50342	b.40.7.1	CheW-like	21	-14
670	82094	b.40.9.1	Heme chaperone CcmE	21	-18
671	50347	b.41.1.1	Photosynthetic reaction centre, H-chain, cytoplasmic domain	8	-2
672	110202	b.41.1.3	RIKEN cDNA 2310057j16 protein (KIAA1543)	23	-15
673	50354	b.42.1.1	Fibroblast growth factors (FGF)	29	-9
674	50362	b.42.1.2	Interleukin-1 (IL-1)	18	-7
675	50371	b.42.2.1	Ricin B-like	10	0
676	50379	b.42.2.2	Cysteine rich domain	13	-14
677	50387	b.42.4.1	Kunitz (STI) inhibitors	5	-2
678	50406	b.42.5.1	Fascin	28	-23
679	82110	b.42.6.1	MIR domain	36	-21
680	110218	b.42.7.1	DNA-binding protein LAG-1 (CSL)	25	-17
681	110222	b.42.8.1	AbfB domain	6	0
682	50444	b.43.2.1	L-fucose isomerase, C-terminal domain	10	0
683	50448	b.43.3.1	Elongation factors	63	-70
684	50461	b.43.3.2	Ribosomal protein L3	44	-10
685	50438	b.43.4.1	NADPH-cytochrome p450 reductase FAD-binding domain-like	72	-53
686	63381	b.43.4.2	Ferredoxin reductase FAD-binding domain-like	91	-39
687	63783	b.43.4.3	Riboflavin synthase	32	-25
688	82115	b.43.5.1	ATP-dependent riboflavin kinase-like	41	-37
689	50466	b.44.1.1	EF-Tu/eEF-1alpha/eIF2-gamma C-terminal domain	69	-63
690	101791	b.44.2.1	Aminomethyltransferase beta-barrel domain	26	-2
691	50476	b.45.1.1	PNP-oxidase like	44	-50
692	50482	b.45.1.2	NADH:FMN oxidoreductase-like	86	-23
693	50487	b.46.1.1	Post formyltransferase domain	31	-16
694	50490	b.46.1.2	3-methyladenine DNA glycosylase (AAG, ANPG, MPG)	78	-49
695	50495	b.47.1.1	Prokaryotic proteases	111	-70
696	50514	b.47.1.2	Eukaryotic proteases	43	-37
697	50616	b.49.1.1	N-terminal domain of alpha and beta subunits of F1 ATP synthase	82	-51
698	88682	b.49.2.2	Alanine racemase	51	-13
699	88683	b.49.2.3	Eukaryotic ODC-like	69	-86
700	101822	b.49.3.1	Aminopeptidase/glucanase lid domain	17	-8
701	50631	b.50.1.1	Retroviral protease (retropepsin)	13	0
702	50646	b.50.1.2	Pepsin-like	83	-59
703	50678	b.51.1.1	ValRS/IleRS/LeuRS editing domain	64	-58
704	50686	b.52.1.1	Eng V-like	11	-3
705	50689	b.52.1.2	Barwin	6	-6
706	82135	b.52.1.3	Pollen allergen PHL P 1 N-terminal domain	11	-11
707	50693	b.52.2.1	Pyruvoyl dependent aspartate decarboxylase, ADC	38	-38
708	50696	b.52.2.2	Formate dehydrogenase/DMSO reductase, C-terminal domain	109	-51
709	50708	b.52.2.3	Cdc48 N-terminal domain-like	45	-22
710	50716	b.53.1.1	Ribosomal protein L25-like	28	-8
711	50719	b.53.1.2	Gln-tRNA synthetase (GlnRS), C-terminal (anticodon-binding) domain	39	-63
712	50724	b.54.1.1	Core binding factor beta, CBF	10	-16
713	50730	b.55.1.1	Pleckstrin-homology domain (PH domain)	34	-12
714	50755	b.55.1.2	Phosphotyrosine-binding domain (PTB)	29	-12
715	50764	b.55.1.3	Ran-binding domain	40	-38
716	50767	b.55.1.4	Enabled/VASP homology 1 domain (EVH1 domain)	26	-16
717	50776	b.55.1.5	Third domain of FERM	33	-11
718	82146	b.55.1.6	PreBEACH PH-like domain	27	-21
719	101836	b.55.1.7	Dcp1	2	-4
720	101839	b.55.1.8	GRAM domain	18	-21
721	110272	b.55.1.9	TFIIH domain	14	-9
722	50785	b.56.1.1	Transcription factor IIA (TFIIA), beta-barrel domain	23	-13
723	50801	b.58.1.1	Pyruvate kinase beta-barrel domain	48	-33
724	101844	b.58.1.2	MOSC (MOCO sulphurase C-terminal) domain	71	-12
725	50810	b.59.1.1	XRCC4, N-terminal domain	10	-13
726	49504	b.6.1.1	Plastocyanin/azurin-like	49	-9
727	49541	b.6.1.2	Periplasmic domain of cytochrome c oxidase subunit II	77	-30
728	49550	b.6.1.3	Multidomain cupredoxins	162	-60
729	63392	b.6.1.4	Nitrosocyanin	24	-8
730	74874	b.6.1.5	Ephrin ectodomain	19	-10
731	110107	b.6.1.6	Peptidylarginine deiminase Pad4, N-terminal domain	9	-6
732	50815	b.60.1.1	Retinol binding protein-like	82	-31
733	50847	b.60.1.2	Fatty acid binding protein-like	26	-12
734	101863	b.60.1.4	Hypothetical protein YodA	18	0
735	101866	b.60.1.5	Hypothetical protein YwiB	2	0
736	50887	b.61.3.1	D-aminopeptidase, middle and C-terminal domains	7	0
737	69299	b.61.4.1	Quinohemoprotein amine dehydrogenase A chain, domain 3	4	-2
738	75002	b.61.5.1	Dipeptidyl peptidase I (cathepsin C), exclusion domain	18	-9
739	101875	b.61.6.1	YceI-like	55	-22
740	50892	b.62.1.1	Cyclophilin (peptidylprolyl isomerase)	99	-63
741	110278	b.62.1.2	Outer surface protein, C-terminal domain	6	0
742	50905	b.63.1.1	Oncogene products	9	-10
743	50912	b.64.1.1	Mannose 6-phosphate receptor domain	16	-8
744	50917	b.65.1.1	Rap30/74 interaction domains	18	-12
745	50924	b.66.1.1	Hemopexin-like domain	30	-17
746	50935	b.67.1.1	Tachylectin-2	7	0
747	75006	b.67.2.1	alpha-L-arabinanase-like	42	-4
748	101881	b.67.2.2	Levansucrase	22	0
749	101884	b.67.2.3	Glycosyl hydrolases family 32 N-terminal domain	100	-37
750	110284	b.67.2.4	TM1225-like predicted glycosylases	49	-6
751	101888	b.67.3.1	Apyrase	19	-20
752	50940	b.68.1.1	Sialidases (neuraminidases)	45	-11
753	101905	b.68.10.1	GyrA/ParC C-terminal domain-like	12	-19
754	50953	b.68.2.1	Soluble quinoprotein glucose dehydrogenase	43	-66
755	50957	b.68.3.1	Thermostable phytase (3-phytase)	37	-6
756	50961	b.68.4.1	TolB, C-terminal domain	20	0
757	63826	b.68.5.1	YWTD domain	26	-18
758	63830	b.68.6.1	SGL-like	3	-4
759	101895	b.68.6.2	Serum paraoxonase/arylesterase 1, PON1	22	-17
760	69305	b.68.7.1	Tricorn protease N-terminal domain	8	-2
761	89373	b.68.8.1	Fucose-specific lectin	4	0
762	101899	b.68.9.1	NHL repeat	78	-22
763	50966	b.69.1.1	Galactose oxidase, central domain	17	-7
764	75012	b.69.10.1	3-carboxy-cis,cis-mucoante lactonizing enzyme	9	-2
765	101909	b.69.11.1	Putative isomerase YbhE	32	-8
766	101913	b.69.12.1	Sema domain	29	-17
767	110297	b.69.13.1	Oligoxyloglucan reducing end-specific cellobiohydrolase	36	-9
768	50970	b.69.2.1	Methylamine dehydrogenase, H-chain	8	0
769	69309	b.69.2.2	Quinohemoprotein amine dehydrogenase B chain	6	-2
770	82166	b.69.2.3	YVTN repeat	28	-2
771	50975	b.69.3.1	Nitrous oxide reductase, N-terminal domain	58	-8
772	50979	b.69.4.1	WD40-repeat	90	-39
773	110289	b.69.4.2	Cell cycle arrest protein BUB3	15	-4
774	50986	b.69.5.1	Regulator of chromosome condensation RCC1	40	-17
775	69315	b.69.5.2	beta-lactamase inhibitor protein-II, BLIP-II	4	0
776	50990	b.69.6.1	Clathrin heavy-chain terminal domain	33	-14
777	50994	b.69.7.1	Prolyl oligopeptidase, N-terminal domain	68	-30
778	69319	b.69.8.1	Integrin alpha N-terminal domain	41	-12
779	69323	b.69.9.1	Tricorn protease domain 2	6	-2
780	49563	b.7.1.1	PLC-like (P variant)	25	-6
781	49575	b.7.1.2	Synaptotagmin-like (S variant)	27	-18
782	49591	b.7.3.1	PHL pollen allergen	10	-8
783	49595	b.7.4.1	Rab geranylgeranyltransferase alpha-subunit, insert domain	10	-9
784	50999	b.70.1.1	Quinoprotein alcohol dehydrogenase-like	97	-32
785	51005	b.70.2.1	C-terminal (heme d1) domain of cytochrome cd1-nitrite reductase	43	-6
786	82172	b.70.3.1	DPP6 N-terminal domain-like	47	-24
787	51012	b.71.1.1	alpha-Amylases, C-terminal beta-sheet domain	113	-36
788	89388	b.71.1.2	Composite domain of glycosyl hydrolase families 5, 30, 39 and 51	24	-9
789	101928	b.71.1.3	Putative alpha-L-fucosidase C-terminal domain	2	0
790	51046	b.72.1.1	WW domain	8	-6
791	51065	b.73.1.1	Head domain of nucleotide exchange factor GrpE	2	0
792	51070	b.74.1.1	Carbonic anhydrase	98	-29
793	51082	b.75.1.1	Bacteriochlorophyll A protein	2	0
794	82186	b.76.2.1	Histone H3 K4-specific methyltransferase SET7/9 N-terminal domain	8	0
795	51093	b.77.1.1	Vitelline membrane outer protein-I (VMO-I)	16	-14
796	51102	b.77.3.1	Mannose-binding lectins	8	-7
797	49600	b.8.1.1	MATH domain	32	-8
798	69198	b.8.1.2	SIAH, seven in absentia homolog	30	-22
799	51127	b.80.1.1	Pectate lyase-like	36	-1
800	101957	b.80.1.11	Filamentous hemagglutinin FhaB, secretion domain	41	-2
801	51133	b.80.1.2	Pectin lyase	19	-5
802	51137	b.80.1.3	Galacturonase	57	-16
803	51144	b.80.1.4	Chondroitinase B	4	0
804	51147	b.80.1.5	Pectin methylesterase	60	-13
805	51153	b.80.1.7	Virulence factor P.69 pertactin	6	0
806	101951	b.80.1.9	Pectate transeliminase	26	-6
807	63849	b.80.3.1	Cell-division inhibitor MinC, C-terminal domain	2	-2
808	69337	b.80.4.1	Alpha subunit of glutamate synthase, C-terminal domain	54	-36
809	69341	b.80.5.1	C-terminal domain of adenylylcyclase associated protein	30	-19
810	101961	b.80.6.1	Stabilizer of iron transporter SufD	37	-34
811	51121	b.80.7.1	Serralysin-like metalloprotease, C-terminal domain	9	0
812	51162	b.81.1.1	UDP N-acetylglucosamine acyltransferase	21	-19
813	51165	b.81.1.2	Tetrahydrodipicolinate-N-succinlytransferase, THDP-succinlytransferase, DapD	14	-14
814	51168	b.81.1.3	Galactoside acetyltransferase-like	125	-50
815	51171	b.81.1.4	GlmU C-terminal domain-like	18	-10
816	51174	b.81.1.5	gamma-carbonic anhydrase-like	91	-35
817	110309	b.81.1.6	Serine acetyltransferase	86	-38
818	101968	b.81.3.1	Adhesin YadA, collagen-binding domain	5	-2
819	51183	b.82.1.1	dTDP-sugar isomerase	91	-64
820	101976	b.82.1.10	TM1459-like	2	0
821	101979	b.82.1.11	YlbA-like	34	-10
822	101984	b.82.1.12	Pirin-like	118	-72
823	110318	b.82.1.13	KduI-like	32	-6
824	51187	b.82.1.2	Germin/Seed storage 7S protein	53	-11
825	51191	b.82.1.3	Type I phosphomannose isomerase	57	-32
826	51194	b.82.1.4	Homogentisate dioxygenase	57	-39
827	75035	b.82.1.5	Quercetin 2,3-dioxygenase-like	10	0
828	82191	b.82.1.6	Acireductone dioxygenase	27	-6
829	89403	b.82.1.7	Glucose-6-phosphate isomerase, GPI	6	0
830	89406	b.82.1.8	Hypothetical protein TM1112	4	0
831	89409	b.82.1.9	TM1287-like	2	-2
832	51198	b.82.2.1	Penicillin synthase-like	58	-6
833	51203	b.82.2.2	Clavaminate synthase	7	0
834	63855	b.82.2.3	Gab protein (hypothetical protein YgaT)	16	0
835	75038	b.82.2.5	TauD/TfdA-like	106	-36
836	82194	b.82.2.6	Hypoxia-inducible factor HIF ihhibitor (FIH1)	21	-8
837	51210	b.82.3.2	cAMP-binding domain	69	-40
838	51216	b.82.4.1	Regulatory protein AraC	6	0
839	51220	b.82.5.1	Trp RNA-binding attenuation protein (TRAP)	6	-4
840	101995	b.82.5.2	PA3696/SPS0176-like	40	-8
841	63863	b.82.6.1	Thiamin pyrophosphokinase, substrate-binding domain	19	-14
842	81652	b.82.7.1	Calcium ATPase, transduction domain A	59	-23
843	51231	b.84.1.1	Biotinyl/lipoyl-carrier proteins and domains	114	-82
844	51247	b.84.2.1	BC C-terminal domain-like	99	-96
845	51256	b.84.2.2	Cytochrome f, small domain	9	-2
846	51262	b.84.3.1	Glucose permease-like	60	-20
847	51270	b.85.1.1	AFP III-like domain	2	-2
848	51279	b.85.3.1	Urease, beta-subunit	81	-33
849	51284	b.85.4.1	dUTPase-like	54	-71
850	63868	b.85.6.1	MoeA C-terminal domain-like	27	-15
851	82200	b.85.7.1	Histone lysine methyltransferases	51	-24
852	82210	b.85.7.3	RuBisCo LSMT catalytic domain	19	-2
853	51295	b.86.1.1	Hedgehog C-terminal (Hog) autoprocessing domain	4	-2
854	51298	b.86.1.2	Intein (protein splicing domain)	21	-4
855	51307	b.87.1.1	LexA-related	19	-5
856	51312	b.87.1.2	Type 1 signal peptidase	23	-14
857	51317	b.88.1.1	RabGEF Mss4	12	-12
858	63873	b.88.1.2	Translationally controlled tumor protein TCTP (histamine-releasing factor)	40	-28
859	75041	b.88.1.3	SelR domain	91	-81
860	49607	b.9.1.1	Neurophysin II	14	-12
861	51339	b.92.1.1	alpha-Subunit of urease	77	-35
862	75044	b.92.1.3	Hydantoinase (dihydropyrimidinase)	11	-12
863	82224	b.92.1.4	SAH/MTA deaminase-like	2	0
864	51345	b.93.1.1	Epsilon subunit of F1F0-ATP synthase N-terminal domain	27	-22
865	63698	b.94.1.1	Olfactory marker protein	7	-2
866	63708	b.95.1.1	Ganglioside M2 (gm2) activator	10	-6
867	63713	b.96.1.1	Nicotinic receptor ligand binding domain-like	13	0
868	63725	b.97.1.1	Anemone pore-forming cytolysin	3	0
869	63738	b.98.1.1	Leukotriene A4 hydrolase N-terminal domain	49	-29
870	51352	c.1.1.1	Triosephosphate isomerase (TIM)	57	-31
871	51570	c.1.10.1	Class I aldolase	159	-113
872	51591	c.1.10.2	Class II FBP aldolase	76	-47
873	51594	c.1.10.3	5-aminolaevulinate dehydratase, ALAD (porphobilinogen synthase)	39	-17
874	51599	c.1.10.4	Class I DAHP synthetase	93	-60
875	89494	c.1.10.5	HMGL-like	117	-101
876	110368	c.1.10.6	NeuB-like	118	-44
877	51605	c.1.11.1	Enolase	71	-40
878	51609	c.1.11.2	D-glucarate dehydratase-like	104	-73
879	51622	c.1.12.1	Pyruvate kinase	92	-50
880	51629	c.1.12.2	Pyruvate phosphate dikinase, C-terminal domain	68	-35
881	51632	c.1.12.3	Phosphoenolpyruvate carboxylase	53	-27
882	51638	c.1.12.5	HpcH/HpaI aldolase	104	-19
883	88704	c.1.12.7	Phosphoenolpyruvate mutase/Isocitrate lyase-like	89	-70
884	89503	c.1.12.8	Ketopantoate hydroxymethyltransferase PanB	19	-38
885	51646	c.1.13.1	Malate synthase G	42	-15
886	51650	c.1.14.1	RuBisCo, large subunit, C-terminal domain	57	-31
887	51659	c.1.15.1	Endonuclease IV	51	-40
888	51662	c.1.15.2	L-rhamnose isomerase	22	-4
889	51665	c.1.15.3	Xylose isomerase	81	-25
890	75090	c.1.15.4	IolI-like	6	0
891	75093	c.1.15.5	Hypothetical protein YgbM (EC1530)	54	-42
892	110377	c.1.15.6	UxuA-like	61	-10
893	51680	c.1.16.1	Bacterial luciferase (alkanal monooxygenase)	8	0
894	51687	c.1.16.3	F420 dependent oxidoreductases	28	-9
895	82275	c.1.16.4	Ssud-like monoxygenases	141	-59
896	51691	c.1.17.1	NadC C-terminal domain-like	36	-69
897	51696	c.1.18.1	Mammalian PLC	60	-29
898	51699	c.1.18.2	Bacterial PLC	17	0
899	89508	c.1.18.3	Glycerophosphoryl diester phosphodiesterase	76	-20
900	51704	c.1.19.1	Methylmalonyl-CoA mutase, N-terminal (CoA-binding) domain	82	-60
901	51707	c.1.19.2	Glutamate mutase, large subunit	14	-4
902	51710	c.1.19.3	Diol dehydratase, alpha subunit	16	-2
903	51367	c.1.2.1	Histidine biosynthesis enzymes	49	-36
904	51372	c.1.2.2	D-ribulose-5-phosphate 3-epimerase	42	-29
905	51375	c.1.2.3	Decarboxylase	39	-41
906	51381	c.1.2.4	Tryptophan biosynthesis enzymes	62	-51
907	51714	c.1.20.1	tRNA-guanine transglycosylase	38	-40
908	51718	c.1.21.1	Dihydropteroate synthetase	32	-23
909	51723	c.1.21.2	Methyltetrahydrofolate-utiluzing methyltransferases	21	-13
910	51727	c.1.22.1	Uroporphyrinogen decarboxylase, UROD	35	-23
911	110384	c.1.22.2	Cobalamin-independent methionine synthase	130	-74
912	51731	c.1.23.1	Methylenetetrahydrofolate reductase	61	-54
913	82279	c.1.23.2	Proline dehydrohenase domain of bifunctional PutA protein	15	-22
914	63893	c.1.24.1	Pyridoxine 5'-phosphate synthase	5	-8
915	75099	c.1.25.1	Monomethylamine methyltransferase MtmB	6	-1
916	82283	c.1.26.1	Homocysteine S-methyltransferase	57	-46
917	102111	c.1.27.1	(2r)-phospho-3-sulfolactate synthase ComA	20	-6
918	102115	c.1.28.1	Biotin synthase	23	-50
919	102118	c.1.28.2	Oxygen-independent coproporphyrinogen III oxidase HemN	57	-51
920	110388	c.1.28.3	MoCo biosynthesis proteins	87	-65
921	110392	c.1.29.1	GlpP-like	10	0
922	51392	c.1.3.1	Thiamin phosphate synthase	70	-64
923	110396	c.1.30.1	CutC-like	66	-24
924	110400	c.1.31.1	ThiG-like	29	-38
925	51396	c.1.4.1	FMN-linked oxidoreductases	129	-100
926	51413	c.1.5.1	Inosine monophosphate dehydrogenase (IMPDH)	52	-48
927	51420	c.1.6.1	Alanine racemase-like, N-terminal domain	98	-73
928	51427	c.1.6.2	Hypothetical protein ybl036c	36	-44
929	51431	c.1.7.1	Aldo-keto reductases (NADP)	207	-146
930	51446	c.1.8.1	Amylase, catalytic domain	227	-217
931	82253	c.1.8.10	alpha-D-glucuronidase/Hyaluronidase catalytic domain	36	0
932	102079	c.1.8.11	Putative alpha-L-fucosidase, catalytic domain	72	-20
933	110354	c.1.8.12	Outer surface protein, N-terminal domain	14	-13
934	51487	c.1.8.3	beta-glycanases	226	-108
935	51521	c.1.8.4	Family 1 of glycosyl hydrolase	197	-96
936	51534	c.1.8.5	Type II chitinase	157	-79
937	51550	c.1.8.6	beta-N-acetylhexosaminidase catalytic domain	101	-52
938	51553	c.1.8.7	NagZ-like	178	-52
939	63912	c.1.8.8	1,4-beta-N-acetylmuraminidase	43	-9
940	69387	c.1.8.9	Bee venom hyaluronidase	27	-25
941	51557	c.1.9.1	Adenosine/AMP deaminase	96	-62
942	82261	c.1.9.10	N-acetylglucosamine-6-phosphate deacetylase, NagA, catalytic domain	85	-60
943	82264	c.1.9.11	D-aminoacylase, catalytic domain	63	-14
944	82267	c.1.9.12	TatD Mg-dependent DNase-like	73	-55
945	89489	c.1.9.13	Isoaspartyl dipeptidase, catalytic domain	32	-12
946	51560	c.1.9.2	alpha-subunit of urease, catalytic domain	81	-36
947	51564	c.1.9.3	Phosphotriesterase-like	51	-10
948	63917	c.1.9.4	Dihydroorotase	24	-14
949	69390	c.1.9.5	Cytosine deaminase catalytic domain	56	-14
950	75073	c.1.9.6	Hydantoinase (dihydropyrimidinase), catalytic domain	163	-72
951	75079	c.1.9.7	Renal dipeptidase	100	-48
952	75082	c.1.9.8	Uronate isomerase-like	50	-16
953	82258	c.1.9.9	SAH/MTA deaminase-like	65	-37
954	52048	c.10.1.1	28-residue LRR	35	-23
955	52052	c.10.1.2	Rna1p (RanGAP1), N-terminal domain	17	-26
956	52055	c.10.1.3	Cyclin A/CDK2-associated p19, Skp2	23	-11
957	52059	c.10.2.1	Internalin LRR domain	22	-4
958	52062	c.10.2.2	Rab geranylgeranyltransferase alpha-subunit, C-terminal domain	4	-15
959	52065	c.10.2.3	mRNA export factor tap	23	-28
960	52068	c.10.2.4	U2A'-like	29	-31
961	52071	c.10.2.5	L domain	31	-30
962	75142	c.10.2.7	Ngr ectodomain-like	18	-12
963	89569	c.10.2.8	Polygalacturonase inhibiting protein PGIP	8	-4
964	52076	c.10.3.1	Outer arm dynein light chain 1	13	-22
965	64000	c.100.1.1	Thiamin pyrophosphokinase, catalytic domain	28	-17
966	64006	c.101.1.1	Undecaprenyl diphosphate synthase	43	-27
967	64044	c.102.1.1	Cell-division inhibitor MinC, N-terminal domain	2	-2
968	64077	c.103.1.1	MTH938-like	4	0
969	64154	c.104.1.1	YjeF N-terminal domain-like	24	-24
970	64159	c.105.1.1	2,3-Bisphosphoglycerate-independent phosphoglycerate mutase, substrate-binding domain	54	-32
971	64168	c.106.1.1	SurE-like	27	-46
972	64183	c.107.1.1	Manganese-dependent inorganic pyrophosphatase (family II)	31	-26
973	75323	c.107.1.2	Exonuclease RecJ	9	-4
974	56785	c.108.1.1	HAD-related	27	-8
975	82388	c.108.1.10	Predicted hydrolases Cof	20	-21
976	102304	c.108.1.11	Homoserine kinase ThrH	23	-4
977	102307	c.108.1.12	Class B acid phosphatase, AphA	4	-2
978	102317	c.108.1.14	NagD-like	93	-50
979	110506	c.108.1.15	Trehalose-phosphatase	2	0
980	110509	c.108.1.16	NLI interacting factor-like phosphatase	53	-26
981	56789	c.108.1.2	YihX-like	16	-7
982	56792	c.108.1.3	Phosphonoacetaldehyde hydrolase-like	32	-6
983	64511	c.108.1.4	Phosphoserine phosphatase	65	-82
984	69467	c.108.1.5	Probable phosphatase YrbI	30	-10
985	75173	c.108.1.6	beta-Phosphoglucomutase-like	34	-12
986	81656	c.108.1.7	Meta-cation ATPase, catalytic domain P	174	-97
987	82382	c.108.1.8	5'(3')-deoxyribonucleotidase (dNT-2)	21	-15
988	68924	c.109.1.1	PEP carboxykinase N-terminal domain	85	-56
989	69501	c.110.1.1	DTD-like	37	-64
990	69573	c.111.1.1	Molybdenum cofactor biosynthesis protein MoeB	50	-70
991	89763	c.111.1.2	Ubiquitin activating enzymes (UBA)	34	-20
992	69594	c.112.1.1	Glycerol-3-phosphate (1)-acyltransferase	5	-4
993	69619	c.113.1.1	HemD-like	23	-20
994	75170	c.114.1.1	DsrEF-like	8	-4
995	75182	c.115.1.1	Hypothetical protein MTH777 (MT0777)	4	-8
996	75218	c.116.1.1	SpoU-like RNA 2'-O ribose methyltransferase	44	-34
997	75221	c.116.1.2	Hypothetical protein MTH1 (MT0001), dimerisation domain	6	0
998	82371	c.116.1.3	YbeA-like	26	-6
999	89629	c.116.1.4	tRNA(m1G37)-methyltransferase TrmD	3	0
1000	89632	c.116.1.5	YggJ C-terminal domain-like	26	-22
1001	75305	c.117.1.1	Amidase signature (AS) enzymes	157	-120
1002	82545	c.118.1.1	GckA/TtuD-like	58	-50
1003	82550	c.119.1.1	DegV-like	39	-33
1004	109613	c.119.1.2	DAK1	118	-53
1005	52081	c.12.1.1	Ribosomal proteins L15p and L18e	15	-6
1006	89619	c.120.1.1	PIN domain	8	-2
1007	53045	c.120.1.2	5' to 3' exonuclease catalytic domain	31	-56
1008	89624	c.121.1.1	Ribose/Galactose isomerase RpiB/AlsB	77	-25
1009	89734	c.122.1.1	L-sulfolactate dehydrogenase-like	113	-38
1010	89797	c.123.1.1	CoA-transferase family III (CaiB/BaiF)	178	-101
1011	52513	c.124.1.1	NagB-like	98	-39
1012	74656	c.124.1.2	CoA transferase alpha subunit-like	117	-60
1013	74657	c.124.1.3	CoA transferase beta subunit-like	109	-56
1014	75176	c.124.1.4	D-ribose-5-phosphate isomerase (RpiA), catalytic domain	45	-24
1015	110513	c.124.1.5	IF2B-like	74	-58
1016	110520	c.124.1.6	Methenyltetrahydrofolate synthetase	38	-20
1017	102216	c.125.1.1	Creatininase	15	0
1018	102221	c.126.1.1	DNA polymerase III psi subunit	2	0
1019	102325	c.127.1.1	F420-dependent methylenetetrahydromethanopterin dehydrogenase (MTD)	2	0
1020	102401	c.128.1.1	DNA polymerase III chi subunit	5	-2
1021	102406	c.129.1.1	MoCo carrier protein-like	67	-55
1022	52088	c.13.1.1	CRAL/TRIO domain	52	-29
1023	52092	c.13.2.1	Anti-sigma factor antagonist SpoIIaa	12	-2
1024	102463	c.131.1.1	Peptidyl-tRNA hydrolase II	30	-35
1025	102523	c.132.1.1	Bacterial fluorinating enzyme, N-terminal domain	6	-2
1026	102547	c.133.1.1	RbsD-like	26	-14
1027	102589	c.134.1.1	LmbE-like	26	-8
1028	102706	c.135.1.1	NIF3 (NGG1p interacting factor 3)-like	16	-8
1029	110461	c.137.1.1 changed to c.23.14.2	Hypothetical protein PA1492	2	0
1030	110582	c.138.1.1	Indigoidine synthase A-like	50	-25
1031	110651	c.139.1.1 changed to c.97.1.3	Hypothetical protein TM1506	2	0
1032	52097	c.14.1.1	Clp protease, ClpP subunit	76	-34
1033	52100	c.14.1.2	Tail specific protease, catalytic domain	89	-48
1034	52103	c.14.1.3	Crotonase-like	173	-128
1035	89572	c.14.1.4	Biotin dependent carboxylase carboxyltransferase domain	125	-68
1036	110711	c.140.1.1	Hypothetical protein TT1679	18	0
1037	110739	c.141.1.1	Glycerate kinase I	51	-30
1038	52114	c.15.1.1	DNA-repair protein XRCC1	13	-14
1039	52117	c.15.1.2	DNA ligase	12	0
1040	63955	c.15.1.3	BRCT domain	19	-15
1041	75148	c.15.1.4	53BP1	17	-16
1042	52122	c.16.1.1	Lumazine synthase	39	-38
1043	52130	c.17.1.1	Caspase catalytic domain	30	-17
1044	52142	c.18.1.1	Uracil-DNA glycosylase	60	-38
1045	52147	c.18.1.2	Mug-like	43	-59
1046	89579	c.18.1.3	Single-strand selective monofunctional uracil-DNA glycosylase SMUG1	32	-12
1047	52152	c.19.1.1	FabD-like	51	-42
1048	53645	c.19.1.2	Lysophospholipase	34	-22
1049	89729	c.19.1.3	Patatin	28	-6
1050	51736	c.2.1.1	Alcohol dehydrogenase-like, C-terminal domain	154	-133
1051	75110	c.2.1.11	Siroheme synthase N-terminal domain-like	6	-2
1052	102174	c.2.1.12	Transcriptional repressor Rex, C-terminal domain	2	0
1053	110436	c.2.1.13	Ornithine cyclodeaminase-like	125	-39
1054	51751	c.2.1.2	Tyrosine-dependent oxidoreductases	169	-97
1055	51800	c.2.1.3	Glyceraldehyde-3-phosphate dehydrogenase-like, N-terminal domain	134	-110
1056	51830	c.2.1.4	Formate/glycerate dehydrogenases, NAD-domain	116	-118
1057	51848	c.2.1.5	LDH N-terminal domain-like	111	-79
1058	51868	c.2.1.6	6-phosphogluconate dehydrogenase-like, N-terminal domain	121	-140
1059	51883	c.2.1.7	Aminoacid dehydrogenase-like, C-terminal domain	110	-83
1060	51900	c.2.1.8	CoA-binding domain	61	-49
1061	63944	c.2.1.9	Potassium channel NAD-binding domain	33	-17
1062	52157	c.20.1.1	Initiation factor IF2/eIF5b, domain 3	20	-14
1063	52162	c.21.1.1	Ribosomal protein L13	10	-12
1064	52167	c.22.1.1	Ribosomal protein L4	36	-23
1065	52173	c.23.1.1	CheY-related	123	-90
1066	52194	c.23.1.2	Receiver domain of the ethylene receptor	7	0
1067	52273	c.23.10.3	Acetylhydrolase	18	-22
1068	52276	c.23.10.4	Rhamnogalacturonan acetylesterase	17	0
1069	89594	c.23.10.5	TAP-like	12	-10
1070	102240	c.23.10.6	Hypothetical protein alr1529	10	0
1071	52280	c.23.11.1	Beta-D-glucan exohydrolase, C-terminal domain	51	-14
1072	52284	c.23.12.1	Formate/glycerate dehydrogenases, substrate-binding domain	84	-48
1073	52297	c.23.12.2	L-alanine dehydrogenase-like	73	-66
1074	52300	c.23.12.3	S-adenosylhomocystein hydrolase	39	-42
1075	52305	c.23.13.1	Type II 3-dehydroquinate dehydratase	36	-46
1076	52310	c.23.14.1	N-deoxyribosyltransferase	5	0
1077	52314	c.23.15.1	Ribosomal protein S2	44	-43
1078	52318	c.23.16.1	Class I glutamine amidotransferases (GAT)	48	-74
1079	52325	c.23.16.2	DJ-1/PfpI	134	-109
1080	52331	c.23.16.4	Aspartyl dipeptidase PepE	33	-16
1081	82351	c.23.16.5	A4 beta-galactosidase middle domain	15	0
1082	110486	c.23.16.6	ThuA-like	21	-6
1083	63966	c.23.17.1	Precorrin-8X methylmutase CbiC/CobH	62	-26
1084	52201	c.23.2.1	Toll/Interleukin receptor TIR domain	42	-32
1085	52211	c.23.4.1	Succinyl-CoA synthetase domains	95	-56
1086	52219	c.23.5.1	Flavodoxin-related	57	-21
1087	52231	c.23.5.2	Cytochrome p450 reductase N-terminal domain-like	43	-24
1088	52235	c.23.5.3	Quinone reductase	79	-32
1089	89590	c.23.5.4	NADPH-dependent FMN reductase	69	-13
1090	102237	c.23.5.6	Hypothetical protein YwqN	4	-6
1091	110477	c.23.5.7	Flavoprotein NrdI	2	-6
1092	52243	c.23.6.1	Cobalamin (vitamin B12)-binding domain	83	-64
1093	52256	c.23.8.1	N5-CAIR mutase (phosphoribosylaminoimidazole carboxylase, PurE)	21	-10
1094	52336	c.24.1.1	Carbamoyl phosphate synthetase, large subunit allosteric, C-terminal domain	4	0
1095	52339	c.24.1.2	Methylglyoxal synthase, MgsA	53	-32
1096	63971	c.24.1.3	Inosicase	23	-19
1097	52344	c.25.1.1	Reductases	64	-39
1098	52359	c.25.1.2	Aromatic dioxygenase reductase-like	9	-8
1099	52362	c.25.1.3	Dihydroorotate dehydrogenase B, PyrK subunit	8	-2
1100	52365	c.25.1.4	NADPH-cytochrome p450 reductase-like	66	-32
1101	52370	c.25.1.5	Flavohemoglobin, C-terminal domain	14	-4
1102	52375	c.26.1.1	Class I aminoacyl-tRNA synthetases (RS), catalytic domain	62	-26
1103	52394	c.26.1.2	Cytidylyltransferase	27	-8
1104	52397	c.26.1.3	Adenylyltransferase	53	-49
1105	63976	c.26.1.4	Pantothenate synthetase (Pantoate-beta-alanine ligase, PanC)	18	-24
1106	63979	c.26.1.5	ATP sulfurylase catalytic domain	63	-33
1107	52403	c.26.2.1	N-type ATP pyrophosphatases	86	-60
1108	52410	c.26.2.2	PAPS reductase-like	17	-4
1109	52432	c.26.2.3	ETFP subunits	110	-78
1110	52436	c.26.2.4	Universal stress protein-like	21	0
1111	82359	c.26.2.5	PP-loop ATPase	10	-4
1112	52414	c.26.3.1	UDP-glucose/GDP-mannose dehydrogenase C-terminal domain	30	-4
1113	52419	c.27.1.1	Nucleoside phosphorylase/phosphoribosyltransferase catalytic domain	71	-53
1114	52426	c.28.1.1	Cryptochrome/photolyase, N-terminal domain	71	-46
1115	51906	c.3.1.1	C-terminal domain of adrenodoxin reductase-like	75	-42
1116	51913	c.3.1.2	FAD-linked reductases, N-terminal domain	194	-112
1117	51931	c.3.1.3	GDI-like N domain	35	-11
1118	51934	c.3.1.4	Succinate dehydrogenase/fumarate reductase flavoprotein N-terminal domain	107	-76
1119	51943	c.3.1.5	FAD/NAD-linked reductases, N-terminal and central domains	126	-109
1120	52441	c.30.1.1	BC N-terminal domain-like	87	-84
1121	52452	c.30.1.2	D-Alanine ligase N-terminal domain	28	-14
1122	52457	c.30.1.3	Prokaryotic glutathione synthetase, N-terminal domain	20	-10
1123	52460	c.30.1.4	Eukaryotic glutathione synthetase, substrate-binding domain	23	-14
1124	52463	c.30.1.5	Synapsin domain	22	-13
1125	52468	c.31.1.1	Deoxyhypusine synthase, DHS	39	-20
1126	52471	c.31.1.2	C-terminal domain of the electron transfer flavoprotein alpha subunit	92	-70
1127	52475	c.31.1.3	Pyruvate oxidase and decarboxylase, middle domain	94	-82
1128	52484	c.31.1.4	Transhydrogenase domain III (dIII)	60	-50
1129	63984	c.31.1.5	Sir2 family of transcriptional regulators	97	-112
1130	52491	c.32.1.1	Tubulin, GTPase domain	82	-36
1131	100948	c.33.1.3	Isochorismatase-like hydrolases	122	-116
1132	52508	c.34.1.1	Homo-oligomeric flavin-containing Cys decarboxylases, HFCD	79	-40
1133	88760	c.36.1.10	TK-like PP module	120	-53
1134	88766	c.36.1.11	Branched-chain alpha-keto acid dehydrogenase PP module	144	-75
1135	88771	c.36.1.12	PFOR PP module	63	-28
1136	88724	c.36.1.5	Pyruvate oxidase and decarboxylase Pyr module	132	-93
1137	88735	c.36.1.6	TK-like Pyr module	90	-37
1138	88741	c.36.1.7	Branched-chain alpha-keto acid dehydrogenase Pyr module	142	-84
1139	88746	c.36.1.8	PFOR Pyr module	69	-14
1140	88749	c.36.1.9	Pyruvate oxidase and decarboxylase PP module	91	-82
1141	52541	c.37.1.1	Nucleotide and nucleoside kinases	82	-66
1142	52652	c.37.1.10	Nitrogenase iron protein-like	85	-59
1143	52670	c.37.1.11	RecA protein-like (ATPase-domain)	99	-91
1144	52686	c.37.1.12	ABC transporter ATPase domain-like	159	-110
1145	64011	c.37.1.15	ATP sulfurylase C-terminal domain	8	-2
1146	69496	c.37.1.16	Helicase-like "domain" of reverse gyrase	22	-5
1147	75195	c.37.1.17	Gluconate kinase	58	-12
1148	75213	c.37.1.18	YjeE-like	6	-4
1149	81268	c.37.1.19	Tandem AAA-ATPase domain	91	-82
1150	52566	c.37.1.2	Shikimate kinase (AroK)	25	-8
1151	81269	c.37.1.20	Extended AAA-ATPase domain	99	-65
1152	89678	c.37.1.22	Bacterial cell division inhibitor SulA	2	0
1153	52569	c.37.1.3	Chloramphenicol phosphotransferase	2	-2
1154	52572	c.37.1.4	Adenosine-5'phosphosulfate kinase (APS kinase)	12	-11
1155	52575	c.37.1.5	PAPS sulfotransferase	66	-25
1156	52584	c.37.1.6	Phosphoribulokinase/pantothenate kinase	88	-60
1157	52589	c.37.1.7	6-phosphofructo-2-kinase/fructose-2,6-bisphosphatase, kinase domain	53	-41
1158	52592	c.37.1.8	G proteins	66	-37
1159	52641	c.37.1.9	Motor proteins	46	-21
1160	52729	c.38.1.1	PTS IIb component	35	-6
1161	52734	c.39.1.1	Nicotinate mononucleotide:5,6-dimethylbenzimidazole phosphoribosyltransferase (CobT)	41	-46
1162	51972	c.4.1.1	N-terminal domain of adrenodoxin reductase-like	75	-51
1163	51979	c.4.1.2	D-aminoacid oxidase, N-terminal domain	39	-7
1164	69427	c.4.1.3	UDP-galactopyranose mutase, N-terminal domain	53	0
1165	52739	c.40.1.1	Methylesterase CheB, C-terminal domain	108	-58
1166	52744	c.41.1.1	Subtilases	265	-103
1167	52764	c.41.1.2	Serine-carboxyl proteinase, SCP	58	-11
1168	52769	c.42.1.1	Arginase-like amidino hydrolases	145	-93
1169	52773	c.42.1.2	Histone deacetylase, HDAC	136	-106
1170	52778	c.43.1.1	CAT-like	116	-77
1171	75229	c.43.1.2	NRPS condensation domain (amide synthase)	13	-1
1172	82424	c.43.1.3	Choline/Carnitine O-acyltransferase	63	-48
1173	52789	c.44.1.1	Low-molecular-weight phosphotyrosine protein phosphatases	83	-93
1174	52795	c.44.2.1	PTS system, Lactose/Cellobiose specific IIB subunit	13	-4
1175	52800	c.45.1.1	Dual specificity phosphatase-like	49	-21
1176	52805	c.45.1.2	Higher-molecular-weight phosphotyrosine protein phosphatases	64	-36
1177	102422	c.45.1.3	Myotubularin-like phosphatases	31	-18
1178	52822	c.46.1.1	Cell cycle control phosphatase, catalytic domain	49	-31
1179	52827	c.46.1.2	Multidomain sulfurtransferase (rhodanese)	91	-48
1180	69509	c.46.1.3	Single-domain sulfurtransferase	8	-3
1181	52834	c.47.1.1	Thioltransferase	69	-30
1182	52901	c.47.1.10	Glutathione peroxidase-like	123	-131
1183	52918	c.47.1.11	Thioredoxin-like 2Fe-2S ferredoxin	4	0
1184	69518	c.47.1.12	ArsC-like	24	-23
1185	100953	c.47.1.13	DsbA-like	32	-15
1186	102446	c.47.1.14	SH3BGR (SH3-binding, glutamic acid-rich protein-like)	6	-8
1187	102449	c.47.1.15	KaiB-like	2	-2
1188	110612	c.47.1.16	Txnl5-like	11	-12
1189	52849	c.47.1.2	PDI-like	77	-15
1190	52855	c.47.1.3	Calsequestrin	15	-11
1191	52862	c.47.1.5	Glutathione S-transferase (GST), N-terminal domain	82	-32
1192	52888	c.47.1.6	Phosducin	11	-22
1193	52892	c.47.1.7	ERP29 N domain-like	20	-6
1194	52895	c.47.1.8	spliceosomal protein U5-15Kd	15	-24
1195	52898	c.47.1.9	DsbC/DsbG C-terminal domain-like	16	-9
1196	52923	c.48.1.1	Transketolase C-terminal domain-like	78	-47
1197	52926	c.48.1.2	Branched-chain alpha-keto acid dehydrogenase beta-subunit, C-terminal-domain	103	-47
1198	52931	c.48.1.3	Pyruvate-ferredoxin oxidoreductase, PFOR, domain II	56	-12
1199	52936	c.49.1.1	Pyruvate kinase, C-terminal domain	39	-21
1200	110616	c.49.1.2	MTH1675-like	12	-14
1201	52944	c.49.2.1	ATP synthase (F1-ATPase), gamma subunit	38	-15
1202	51985	c.5.1.1	MurCD N-terminal domain	37	-18
1203	52950	c.50.1.1	Leucine aminopeptidase (Aminopeptidase A), N-terminal domain	30	-23
1204	89724	c.50.1.2	Macro domain	141	-59
1205	52955	c.51.1.1	Anticodon-binding domain of Class II aaRS	77	-61
1206	52965	c.51.2.1	TolB, N-terminal domain	8	-6
1207	52969	c.51.3.1	Diol dehydratase, beta subunit	15	0
1208	52973	c.51.4.1	ITPase (Ham1)	59	-18
1209	52976	c.51.4.2	Maf-like	84	-69
1210	110621	c.51.4.3	YjjX-like	12	-10
1211	53008	c.52.1.10	Restriction endonuclease NgoIV	4	0
1212	53011	c.52.1.11	Restriction endonuclease BsobI	6	0
1213	53020	c.52.1.14	DNA mismatch repair protein MutH from	6	0
1214	53023	c.52.1.15	Very short patch repair (VSR) endonuclease	38	-6
1215	53026	c.52.1.16	TnsA endonuclease, N-terminal domain	24	0
1216	64080	c.52.1.18	Hjc-like	4	0
1217	52984	c.52.1.2	Restriction endonuclease EcoRV	4	0
1218	89716	c.52.1.20	XPF/Rad1/Mus81 nuclease	3	-16
1219	102474	c.52.1.22	Type II restriction endonuclease catalytic domain	8	0
1220	53033	c.52.2.1	tRNA-intron endonuclease catalytic domain-like	7	0
1221	53037	c.52.3.1	Eukaryotic RPB5 N-terminal domain	9	-10
1222	53042	c.53.1.1	gamma,delta resolvase, catalytic domain	51	0
1223	53057	c.53.2.1	beta-carbonic anhydrase, cab	92	-64
1224	53063	c.54.1.1	EIIA-man component-like	14	0
1225	53068	c.55.1.1	Actin/HSP70	117	-68
1226	110636	c.55.1.10	ROK	12	-10
1227	53080	c.55.1.2	Acetokinase-like	111	-83
1228	53083	c.55.1.3	Hexokinase	73	-33
1229	53089	c.55.1.4	Glycerol kinase	132	-117
1230	64089	c.55.1.5	BadF/BadG/BcrA/BcrD-like	41	-24
1231	82440	c.55.1.6	ATPase domain of dehydratase reactivase alpha subunit	15	0
1232	110627	c.55.1.7	Glucokinase	41	-24
1233	110633	c.55.1.9	YeaZ-like	3	-5
1234	53093	c.55.2.1	Creatinase/prolidase N-terminal domain	41	-18
1235	53099	c.55.3.1	Ribonuclease H	60	-60
1236	110640	c.55.3.10	PIWI domain	4	0
1237	53112	c.55.3.3	mu transposase, core domain	6	0
1238	53115	c.55.3.4	Transposase inhibitor (Tn5 transposase)	48	-4
1239	53118	c.55.3.5	DnaQ-like 3'-5' exonuclease	71	-66
1240	53134	c.55.3.6	RuvC resolvase	32	-14
1241	69533	c.55.3.7	Mitochondrial resolvase ydc2 catalytic domain	2	0
1242	102485	c.55.3.8	Putative Holliday junction resolvase RuvX	28	-4
1243	102492	c.55.3.9	CAF1-like ribonuclease	36	-17
1244	53138	c.55.4.1	Ribosomal protein L18 and S11	48	-41
1245	53143	c.55.4.2	ERF1/Dom34 middle domain-like	32	-12
1246	53147	c.55.5.1	MTH1175-like	7	0
1247	102496	c.55.5.2	Nitrogenase accessory factor	8	0
1248	53151	c.55.6.1	DNA repair protein MutS, domain II	13	-4
1249	53156	c.55.7.1	Methylated DNA-protein cysteine methyltransferase domain	17	-2
1250	53164	c.56.1.1	Hydrogenase maturating endopeptidase HybD	28	-10
1251	64095	c.56.1.2	Germination protease	4	-2
1252	53168	c.56.2.1	Purine and uridine phosphorylases	100	-85
1253	53179	c.56.3.1	Peptidyl-tRNA hydrolase-like	25	-16
1254	53183	c.56.4.1	Pyrrolidone carboxyl peptidase (pyroglutamate aminopeptidase)	62	-14
1255	53188	c.56.5.1	Pancreatic carboxypeptidases	37	-28
1256	53198	c.56.5.2	Carboxypeptidase T	9	-2
1257	53201	c.56.5.3	Leucine aminopeptidase, C-terminal domain	77	-56
1258	53204	c.56.5.4	Bacterial dinuclear zinc exopeptidases	132	-96
1259	53210	c.56.5.5	FolH catalytic domain-like	13	-10
1260	102517	c.56.5.6	N-acetylmuramoyl-L-alanine amidase-like	43	-32
1261	53214	c.56.6.1	LigB-like	30	0
1262	53219	c.57.1.1	MogA-like	67	-41
1263	64103	c.57.1.2	MoeA central domain-like	76	-54
1264	53224	c.58.1.1	Aminoacid dehydrogenases	106	-99
1265	53235	c.58.1.2	Tetrahydrofolate dehydrogenase/cyclohydrolase	75	-80
1266	53240	c.58.1.3	Malic enzyme N-domain	98	-85
1267	82333	c.58.1.4	Methylene-tetrahydromethanopterin dehydrogenase	10	0
1268	82336	c.58.1.5	Shikimate dehydrogenase-like	63	-28
1269	53245	c.59.1.1	MurCDEF C-terminal domain	32	-42
1270	53250	c.59.1.2	Folylpolyglutamate synthetase, C-terminal domain	2	0
1271	51990	c.6.1.1	Glycosyl hydrolases family 6, cellulases	35	-13
1272	88714	c.6.2.1	alpha-mannosidase	37	-35
1273	89554	c.6.2.2	4-alpha-glucanotransferase, N-terminal domain	14	-2
1274	89559	c.6.2.3	NodB-like polysaccharide deacetylase	39	-18
1275	102189	c.6.2.4	AmyC N-terminal domain-like	35	-8
1276	89551	c.6.3.1	PHP domain	18	-6
1277	110442	c.6.3.2	RNase P subunit p30	2	0
1278	53255	c.60.1.1	Cofactor-dependent phosphoglycerate mutase	103	-46
1279	53258	c.60.1.2	Histidine acid phosphatase	75	-44
1280	53267	c.60.1.4	6-phosphofructo-2-kinase/fructose-2,6-bisphosphatase, phosphatase domain	53	-30
1281	53272	c.61.1.1	Phosphoribosyltransferases (PRTases)	72	-76
1282	53296	c.61.1.2	Phosphoribosylpyrophosphate synthetase-like	70	-53
1283	53301	c.62.1.1	Integrin A (or I) domain	34	-19
1284	82458	c.62.1.2	Trunk domain of Sec23/24	47	-18
1285	100959	c.62.1.3	Ku70 subunit N-terminal domain	17	-9
1286	100962	c.62.1.4	Ku80 subunit N-terminal domain	11	-10
1287	53324	c.64.1.1	Pyruvate-ferredoxin oxidoreductase, PFOR, domain III	54	-12
1288	53329	c.65.1.1	Formyltransferase	55	-41
1289	53336	c.66.1.1	COMT-like	52	-22
1290	53377	c.66.1.11	Type II DNA methylase	16	0
1291	64111	c.66.1.12	Plant O-methyltransferase, C-terminal domain	47	-10
1292	64117	c.66.1.13	tRNA(1-methyladenosine) methyltransferase-like	34	-8
1293	69544	c.66.1.14	Hypothetical protein HI0319 (YecO)	20	-2
1294	69547	c.66.1.15	Arylamine N-methyltransferase	25	-16
1295	69550	c.66.1.16	Guanidinoacetate methyltransferase	18	-8
1296	69557	c.66.1.17	Spermidine synthase	108	-65
1297	69560	c.66.1.18	Mycolic acid cyclopropane synthase	90	-52
1298	75261	c.66.1.19	Histamine methyltransferase	14	-6
1299	53339	c.66.1.2	RNA methyltransferase FtsJ	56	-18
1300	75264	c.66.1.20	Glucose-inhibited division protein B (GidB)	10	-4
1301	82469	c.66.1.21	Hypothetical Protein YjhP	23	-2
1302	82472	c.66.1.22	Precorrin-6Y methyltransferase (CbiT)	2	0
1303	82475	c.66.1.23	MraW-like putative methyltransferases	16	-22
1304	88784	c.66.1.24	rRNA adenine dimethylase-like	50	-28
1305	88786	c.66.1.26	C5 cytosine-specific DNA methylase, DCM	109	-37
1306	88788	c.66.1.28	N6 adenine-specific DNA methylase, DAM	74	0
1307	53342	c.66.1.3	Fibrillarin homologue	38	-23
1308	89743	c.66.1.30	N5-glutamine methyltransferase, HemK	34	-22
1309	89746	c.66.1.31	Catalytic, N-terminal domain of histone methyltransferase Dot1l	28	-18
1310	89751	c.66.1.32	Ta1320-like	2	0
1311	102557	c.66.1.33	rRNA methyltransferase RlmA	19	-10
1312	102560	c.66.1.34	mRNA cap (Guanine N-7) methyltransferase	24	-10
1313	102563	c.66.1.35	Salicylic acid carboxyl methyltransferase (SAMT)	15	-7
1314	102566	c.66.1.36	Thiopurine S-methyltransferase	29	-4
1315	102569	c.66.1.37	Leucine carboxy methyltransferase Ppm1	30	-20
1316	102575	c.66.1.38	NOL1/NOP2/sun	98	-62
1317	102578	c.66.1.39	Ribosomal protein L11 methyltransferase PrmA	12	0
1318	53345	c.66.1.4	Hypothetical protein MJ0882	14	-2
1319	102581	c.66.1.40	(Uracil-5-)-methyltransferase	66	-24
1320	110671	c.66.1.41	UbiE/COQ5-like	28	-2
1321	53348	c.66.1.5	Glycine N-methyltransferase	8	-18
1322	53351	c.66.1.6	Arginine methyltransferase	42	-31
1323	53354	c.66.1.7	Protein-L-isoaspartyl O-methyltransferase	100	-51
1324	53357	c.66.1.8	Chemotaxis receptor methyltransferase CheR, C-terminal domain	54	-36
1325	53384	c.67.1.1	AAT-like	116	-86
1326	53397	c.67.1.2	Beta-eliminating lyases	58	-10
1327	53402	c.67.1.3	Cystathionine synthase-like	112	-84
1328	53417	c.67.1.4	GABA-aminotransferase-like	117	-93
1329	53444	c.67.1.5	Ornithine decarboxylase major domain	39	-14
1330	69565	c.67.1.6	Pyridoxal-dependent decarboxylase	127	-71
1331	53449	c.68.1.1	Spore coat polysaccharide biosynthesis protein SpsA	6	-3
1332	64136	c.68.1.10	N-acetylglucosaminyltransferase I	36	-27
1333	68901	c.68.1.13	Cytidylytransferase	134	-32
1334	75273	c.68.1.14	Glycogenin	46	-23
1335	89760	c.68.1.15	Exostosin	37	-12
1336	102609	c.68.1.16	Glycolipid 2-alpha-mannosyltransferase	28	-15
1337	53452	c.68.1.2	beta 1,4 galactosyltransferase (b4GalT1)	28	-14
1338	53461	c.68.1.5	UDP-glucose pyrophosphorylase	35	-29
1339	53464	c.68.1.6	glucose-1-phosphate thymidylyltransferase	74	-70
1340	53467	c.68.1.7	1,3-glucuronyltransferase	41	-22
1341	53470	c.68.1.8	Molybdenum cofactor biosynthesis protein MobA	14	-12
1342	64131	c.68.1.9	alpha-1,3-galactosyltransferase-like	22	-27
1343	53475	c.69.1.1	Acetylcholinesterase-like	89	-38
1344	53522	c.69.1.10	Carbon-carbon bond hydrolase	26	-4
1345	53525	c.69.1.11	Epoxide hydrolase	115	-65
1346	53531	c.69.1.12	Haloperoxidase	82	-27
1347	53542	c.69.1.13	Thioesterases	39	-36
1348	53547	c.69.1.14	Carboxylesterase/thioesterase 1	40	-47
1349	53552	c.69.1.15	A novel bacterial esterase	14	0
1350	53555	c.69.1.16	Lipase	7	-2
1351	53558	c.69.1.17	Fungal lipases	52	-18
1352	53570	c.69.1.18	Bacterial lipase	42	-15
1353	53577	c.69.1.19	Pancreatic lipase, N-terminal domain	36	-28
1354	53487	c.69.1.2	Carboxylesterase	189	-49
1355	53585	c.69.1.20	Hydroxynitrile lyase-like	10	-7
1356	69581	c.69.1.21	PepX catalytic domain-like	53	-4
1357	69584	c.69.1.22	Thioesterase domain of polypeptide, polyketide and fatty acid synthases	7	-3
1358	75285	c.69.1.23	Ccg1/TafII250-interacting factor B (Cib)	17	-10
1359	82497	c.69.1.24	DPP6 catalytic domain-like	65	-36
1360	82504	c.69.1.25	Acetyl xylan esterase-like	23	-10
1361	82509	c.69.1.26	Biotin biosynthesis protein BioH	8	-2
1362	102620	c.69.1.28	Aclacinomycin methylesterase RdmC	4	-2
1363	102623	c.69.1.29	Carboxylesterase/lipase	7	-1
1364	53491	c.69.1.3	Mycobacterial antigens	12	-1
1365	52260	c.69.1.30	Cutinase-like	20	-1
1366	110699	c.69.1.31	YdeN-like	9	0
1367	110702	c.69.1.32	Putative serine hydrolase Ydr428c	4	-4
1368	53496	c.69.1.4	Prolyl oligopeptidase, C-terminal domain	100	-49
1369	53499	c.69.1.5	Serine carboxypeptidase-like	77	-49
1370	53506	c.69.1.6	Gastric lipase	65	-54
1371	53509	c.69.1.7	Proline iminopeptidase-like	91	-39
1372	53513	c.69.1.8	Haloalkane dehalogenase	32	-4
1373	53518	c.69.1.9	Dienelactone hydrolase	20	-4
1374	51999	c.7.1.1	PFL-like	80	-24
1375	52002	c.7.1.2	R1 subunit of ribonucleotide reductase, C-terminal domain	85	-40
1376	52005	c.7.1.3	Class III anaerobic ribonucleotide reductase NRDD subunit	25	-12
1377	75131	c.7.1.4	B12-dependent (class II) ribonucleotide reductase	24	-6
1378	53591	c.70.1.1	Nucleoside hydrolase	137	-65
1379	53598	c.71.1.1	Dihydrofolate reductases	64	-48
1380	53614	c.72.1.1	Ribokinase-like	161	-85
1381	53620	c.72.1.2	Thiamin biosynthesis kinases	64	-76
1382	64147	c.72.1.3	ADP-specific Phosphofructokinase/Glucokinase	12	0
1383	75292	c.72.1.4	YjeF C-terminal domain-like	38	-26
1384	82515	c.72.1.5	PfkB-like kinase	47	-36
1385	53624	c.72.2.1	MurCDEF	51	-47
1386	53629	c.72.2.2	Folylpolyglutamate synthetase	51	-70
1387	102646	c.72.3.1	CoaB-like	17	-14
1388	53634	c.73.1.1	Carbamate kinase	70	-26
1389	75297	c.73.1.2	N-acetyl-l-glutamate kinase	38	-6
1390	53640	c.74.1.1	AraD-like aldolase/epimerase	77	-35
1391	53650	c.76.1.1	Alkaline phosphatase	135	-57
1392	53653	c.76.1.2	Arylsulfatase	198	-66
1393	64162	c.76.1.3	2,3-Bisphosphoglycerate-independent phosphoglycerate mutase, catalytic domain	53	-41
1394	102651	c.76.1.4	Phosphonoacetate hydrolase	17	-2
1395	53660	c.77.1.1	Dimeric isocitrate & isopropylmalate dehydrogenases	95	-79
1396	82526	c.77.1.2	Monomeric isocitrate dehydrogenase	45	-24
1397	102656	c.77.1.3	PdxA-like	50	-22
1398	102660	c.77.1.4	PlsX-like	7	-18
1399	102663	c.77.1.5	Phosphotransacetylase	64	-39
1400	53672	c.78.1.1	Aspartate/ornithine carbamoyltransferase	78	-56
1401	53682	c.78.2.1	Aspartate/glutamate racemase	62	-26
1402	53687	c.79.1.1	Tryptophan synthase beta subunit-like PLP-dependent enzymes	116	-76
1403	52010	c.8.1.1	Pyruvate phosphate dikinase, central domain	32	-16
1404	52013	c.8.1.2	N-terminal domain of enzyme I of the PEP:sugar phosphotransferase system	4	-2
1405	52017	c.8.2.1	LeuD-like	58	-45
1406	52022	c.8.3.1	Carbamoyl phosphate synthetase, small subunit N-terminal domain	64	-55
1407	52026	c.8.4.1	PA domain	12	-16
1408	52030	c.8.5.1	GroEL-like chaperone, apical domain	75	-27
1409	52034	c.8.5.2	Group II chaperonin (CCT, TRIC), apical domain	57	-28
1410	82318	c.8.6.1	Swiveling domain of dehydratase reactivase alpha subunit	10	0
1411	89563	c.8.7.1	RraA-like	39	-27
1412	102199	c.8.8.1	Putative cyclase	51	-6
1413	53698	c.80.1.1	double-SIS domain	69	-30
1414	53701	c.80.1.2	Phosphoglucose isomerase, PGI	66	-41
1415	69599	c.80.1.3	mono-SIS domain	76	-69
1416	53707	c.81.1.1	Formate dehydrogenase/DMSO reductase, domains 1-3	161	-113
1417	53721	c.82.1.1	ALDH-like	157	-103
1418	69602	c.82.1.2	L-histidinol dehydrogenase HisD	39	-29
1419	53733	c.83.1.1	Aconitase iron-sulfur domain	99	-66
1420	53739	c.84.1.1	Phosphoglucomutase, first 3 domains	101	-85
1421	53744	c.85.1.1	L-fucose isomerase, N-terminal and second domains	10	0
1422	53749	c.86.1.1	Phosphoglycerate kinase	44	-22
1423	53760	c.87.1.2	Peptidoglycan biosynthesis glycosyltransferase MurG	17	-21
1424	53763	c.87.1.3	UDP-N-acetylglucosamine 2-epimerase	104	-61
1425	53766	c.87.1.4	Oligosaccharide phosphorylase	102	-65
1426	64178	c.87.1.5	Gtf glycosyltransferase	29	-12
1427	82540	c.87.1.6	Trehalose-6-phosphate synthase, OtsA	98	-49
1428	89784	c.87.1.7	ADP-heptose LPS heptosyltransferase II	24	-20
1429	110734	c.87.1.8	Glycosyl transferases group 1	69	-64
1430	53775	c.88.1.1	Glutaminase/Asparaginase	89	-41
1431	53785	c.89.1.1	Phosphofructokinase	112	-54
1432	52039	c.9.1.1	Barstar-related	2	-2
1433	52043	c.9.2.1	Ribosomal protein L32e	8	-10
1434	53791	c.90.1.1	Tetrapyrrole methylase	82	-83
1435	53796	c.91.1.1	PEP carboxykinase C-terminal domain	77	-76
1436	64186	c.91.1.2	HPr kinase HprK C-terminal domain	27	-8
1437	53801	c.92.1.1	Ferrochelatase	68	-42
1438	53804	c.92.1.2	Cobalt chelatase CbiK	19	0
1439	53808	c.92.2.1	Periplasmic ferric siderophore binding protein FhuD	14	-2
1440	53811	c.92.2.2	TroA-like	70	-54
1441	53816	c.92.2.3	Nitrogenase iron-molybdenum protein	147	-39
1442	53823	c.93.1.1	L-arabinose binding protein-like	217	-129
1443	53851	c.94.1.1	Phosphate binding protein-like	167	-123
1444	53888	c.94.1.2	Transferrin	38	-16
1445	53902	c.95.1.1	Thiolase-related	135	-116
1446	53914	c.95.1.2	Chalcone synthase-like	82	-52
1447	53921	c.96.1.1	Fe-only hydrogenase	75	-48
1448	53928	c.97.1.1	Cytidine deaminase	50	-43
1449	89800	c.97.1.2	Deoxycytidylate deaminase-like	87	-37
1450	64198	c.97.2.1 changed to c.97.1.4	AICAR transformylase domain of bifunctional purine biosynthesis enzyme ATIC	24	-39
1451	102713	c.97.3.1	JAB1/MPN domain	6	-4
1452	63419	c.98.1.1	MurE/MurF N-terminal domain	9	-4
1453	75139	c.98.2.1	HPr kinase/phoshatase HprK N-terminal domain	4	-4
1454	63993	c.99.1.1	Dipeptide transport protein	27	-16
1455	81307	d.1.1.2	Bacterial ribonucleases	26	-10
1456	81310	d.1.1.3	Ribotoxin	4	-2
1457	81311	d.1.1.4	Fungal ribonucleases	7	-2
1458	54175	d.10.1.2	GCC-box binding domain	15	-8
1459	54178	d.10.1.3	Methyl-CpG-binding domain, MBD	19	-11
1460	55659	d.100.1.1	Ribosomal protein L9 N-domain	4	0
1461	55662	d.100.1.2	N-terminal domain of RNase HI	2	-2
1462	55667	d.101.1.1	Ribonuclease PH domain 2-like	57	-20
1463	55682	d.104.1.1	Class II aminoacyl-tRNA synthetase (aaRS)-like, catalytic domain	59	-32
1464	55707	d.104.1.2	Biotin holoenzyme synthetase	16	-12
1465	55712	d.105.1.1	Clathrin adaptor appendage, alpha and beta chain-specific domain	21	-17
1466	103159	d.105.1.2	Coatomer appendage domain	19	-16
1467	55719	d.106.1.1	Sterol carrier protein, SCP	19	-23
1468	55725	d.107.1.1	Ran-binding protein mog1p	2	-2
1469	111092	d.107.1.2	PsbP-like	8	-2
1470	111095	d.107.1.3	PA0094-like	2	0
1471	55730	d.108.1.1	N-acetyl transferase, NAT	117	-57
1472	55748	d.108.1.2	N-myristoyl transferase, NMT	35	-22
1473	75508	d.108.1.3	Autoinducer synthetase	10	0
1474	82749	d.108.1.4	FemXAB nonribosomal peptidyltransferases	3	0
1475	103179	d.108.1.5	Hypothetical protein cg14615-pa	6	-2
1476	55754	d.109.1.1	Gelsolin-like	57	-33
1477	55762	d.109.1.2	Cofilin-like	49	-36
1478	82755	d.109.2.1	C-terminal, gelsolin-like domain of Sec23/24	36	-12
1479	55771	d.110.1.1	Profilin (actin-binding protein)	47	-28
1480	55782	d.110.2.1	GAF domain	81	-53
1481	75513	d.110.2.2	IclR ligand-binding domain-like	84	-12
1482	111115	d.110.2.3	HrcA C-terminal domain-like	2	0
1483	55786	d.110.3.1	PYP-like	5	0
1484	55789	d.110.3.2	Heme-binding PAS domain	19	-6
1485	82764	d.110.3.5	N-terminal PAS domain of Pas kinase	13	-8
1486	88853	d.110.3.6	Flavin-binding PAS domain	40	-23
1487	103184	d.110.3.7	Hypoxia-inducible factor Hif2a, C-terminal domain	22	-13
1488	103187	d.110.3.8	PAS domain of steroid receptor coactivator 1A, NCo-A1	14	-10
1489	64357	d.110.4.1	Synatpobrevin N-terminal domain	31	-31
1490	75521	d.110.4.2	Clathrin coat assembly domain	34	-34
1491	82767	d.110.4.3	Sedlin (SEDL)	31	-29
1492	90019	d.110.4.4	SRP alpha N-terminal domain-like	2	-2
1493	103191	d.110.6.1	Sensory domain of two-component sensor kinase	13	-2
1494	103197	d.110.7.1	Roadblock/LC7 domain	20	-17
1495	55798	d.111.1.1	PR-1-like	72	-44
1496	55805	d.112.1.1	IIA domain of mannitol-specific and ntr phosphotransferase EII	33	-19
1497	64362	d.112.1.2	Anion transport protein, cytoplasmic domain	37	-24
1498	55812	d.113.1.1	MutT-like	99	-39
1499	64369	d.113.1.2	IPP isomerase-like	8	-2
1500	103211	d.113.1.3	MutY C-terminal domain-like	2	0
1501	103214	d.113.1.4	NADH pyrophosphatase	6	-2
1502	111132	d.113.1.5	GDP-mannose mannosyl hydrolase NudD	8	0
1503	55817	d.114.1.1	5'-nucleotidase (syn. UDP-sugar hydrolase), C-terminal domain	23	-4
1504	55822	d.115.1.1	YrdC-like	61	-72
1505	64372	d.115.1.2	3,4-dihydroxy-2-butanone 4-phosphate synthase, DHBP synthase, RibB	51	-45
1506	55827	d.116.1.1	YbaK/ProRS associated domain	63	-39
1507	55832	d.117.1.1	Thymidylate synthase/dCMP hydroxymethylase	63	-26
1508	55847	d.118.1.1	N-acetylmuramoyl-L-alanine amidase-like	41	-42
1509	54190	d.12.1.1	L23p	8	-4
1510	54193	d.12.1.2	L15e	51	-11
1511	55857	d.120.1.1	Cytochrome b5	40	-20
1512	103222	d.120.1.2	Steroid-binding domain	13	-5
1513	55875	d.122.1.1	Heat shock protein 90, HSP90, N-terminal domain	92	-62
1514	55879	d.122.1.2	DNA gyrase/MutL, N-terminal domain	62	-48
1515	55884	d.122.1.3	Histidine kinase	104	-73
1516	69804	d.122.1.4	alpha-ketoacid dehydrogenase kinase, C-terminal domain	41	-28
1517	55891	d.123.1.1	Sporulation response regulatory protein Spo0B	2	-2
1518	55896	d.124.1.1	Ribonuclease Rh-like	43	-33
1519	55905	d.125.1.1	Ornithine decarboxylase C-terminal domain	20	-6
1520	55910	d.126.1.1	Ribosome anti-association factor eIF6 (aIF6)	29	-22
1521	55914	d.126.1.2	Amidinotransferase	43	-8
1522	64380	d.126.1.3	Dimethylarginine dimethylaminohydrolase DDAH	14	0
1523	103232	d.126.1.4	Arginine deiminase	56	-8
1524	111152	d.126.1.5	Peptidylarginine deiminase Pad4, catalytic C-terminal domain	31	-10
1525	111155	d.126.1.6	Porphyromonas-type peptidylarginine deiminase	94	-27
1526	55921	d.127.1.1	Creatinase/aminopeptidase	104	-83
1527	55932	d.128.1.1	Glutamine synthetase catalytic domain	134	-55
1528	55935	d.128.1.2	Guanido kinase catalytic domain	64	-28
1529	111160	d.128.1.3	Glutamate-cysteine ligase family 2 (GCS2)	42	-21
1530	55946	d.129.1.1	TATA-box binding protein (TBP), C-terminal domain	56	-36
1531	55952	d.129.1.2	DNA repair glycosylase, N-terminal domain	14	-4
1532	55958	d.129.2.1	Phosphoglucomutase, C-terminal domain	49	-29
1533	55962	d.129.3.1	Pathogenesis-related protein 10 (PR10)-like	15	-7
1534	55966	d.129.3.2	STAR domain	22	-19
1535	55969	d.129.3.3	Ring hydroxylating alpha subunit catalytic domain	19	0
1536	64388	d.129.3.4	Phoshatidylinositol transfer protein, PITP	34	-15
1537	111168	d.129.3.5	AHSA1 domain	24	-8
1538	64384	d.129.4.1	Cell-division protein ZipA, C-terminal domain	2	-6
1539	103244	d.129.6.1	Kinase associated domain 1, KA1	37	-28
1540	103248	d.129.7.1	TT1751-like	32	-6
1541	111172	d.129.8.1	Rbstp2229 protein	2	0
1542	54198	d.13.1.1	HIT (HINT, histidine triad) family of protein kinase-interacting proteins	73	-49
1543	54207	d.13.1.2	Hexose-1-phosphate uridylyltransferase	85	-30
1544	102745	d.13.1.3	mRNA decapping enzyme DcpS C-terminal domain	21	-15
1545	55974	d.130.1.1	S-adenosylmethionine synthetase	96	-54
1546	55980	d.131.1.1	DNA polymerase III, beta subunit	13	-15
1547	55983	d.131.1.2	DNA polymerase processivity factor	47	-34
1548	56004	d.133.1.1	Molybdenum cofactor-binding domain	187	-106
1549	56015	d.134.1.1	Nitrite and sulphite reductase 4Fe-4S domain-like	53	-25
1550	56020	d.135.1.1	The spindle assembly checkpoint protein mad2	35	-17
1551	56025	d.136.1.1	Nuclease	8	0
1552	69815	d.136.1.3	Tyrosyl-DNA phosphodiesterase TDP1	43	-29
1553	56030	d.137.1.1	Monooxygenase (hydroxylase) regulatory protein	10	-1
1554	56038	d.138.1.1 changed to b.153.1.1	B3/B4 domain of PheRS, PheT	4	-4
1555	56043	d.139.1.1	PurM C-terminal domain-like	57	-59
1556	54212	d.14.1.1	Translational machinery components	80	-72
1557	102769	d.14.1.10	ATP-dependent protease Lon (La), catalytic domain	80	-45
1558	102772	d.14.1.11	YigZ N-terminal domain-like	32	-6
1559	54220	d.14.1.2	RNase P protein	2	-4
1560	54224	d.14.1.3	DNA gyrase/MutL, second domain	52	-43
1561	54229	d.14.1.4	Ribonuclease PH domain 1-like	40	-47
1562	54232	d.14.1.5	GHMP Kinase, N-terminal domain	83	-79
1563	89827	d.14.1.7	UDP-3-O-[3-hydroxymyristoyl] N-acetylglucosamine deacetylase LpxC	23	-6
1564	102755	d.14.1.8	Hsp90 middle domain	84	-62
1565	102766	d.14.1.9	Imidazole glycerol phosphate dehydratase	41	-25
1566	56048	d.140.1.1	Ribosomal protein S8	45	-30
1567	56054	d.141.1.1	Ribosomal protein L6	47	-31
1568	56060	d.142.1.1	ATP-binding domain of peptide synthetases	58	-29
1569	56067	d.142.1.2	BC ATP-binding domain-like	87	-81
1570	56078	d.142.1.3	Synapsin C-terminal domain	22	-18
1571	56081	d.142.1.4	Succinyl-CoA synthetase, beta-chain, N-terminal domain	58	-39
1572	56085	d.142.1.5	Pyruvate phosphate dikinase, N-terminal domain	68	-36
1573	56088	d.142.1.6	Eukaryotic glutathione synthetase ATP-binding domain	31	-7
1574	103281	d.142.1.7	Lysine biosynthesis enzyme LysX ATP-binding domain	13	-10
1575	56096	d.142.2.2	Adenylation domain of NAD+-dependent DNA ligase	14	-15
1576	56100	d.142.2.3	mRNA capping enzyme	14	-2
1577	56105	d.143.1.1	SAICAR synthase	30	-36
1578	56108	d.143.1.2	Phosphatidylinositol phosphate kinase IIbeta, PIPK IIbeta	39	-29
1579	111188	d.143.1.3	Inositol polyphosphate kinase (IPK)	23	-12
1580	56168	d.144.1.3	Actin-fragmin kinase, catalytic domain	4	0
1581	56171	d.144.1.4	Phoshoinositide 3-kinase (PI3K), catalytic domain	41	-29
1582	64408	d.144.1.5	MHCK/EF2 kinase	20	-11
1583	64411	d.144.1.6	APH phosphotransferases	16	0
1584	88854	d.144.1.7	Protein kinases, catalytic subunit	183	-55
1585	90040	d.144.1.8	Choline kinase	48	-20
1586	111204	d.144.1.9	RIO1-like kinases	12	-4
1587	56177	d.145.1.1	FAD-linked oxidases, N-terminal domain	91	-16
1588	56184	d.145.1.2	Uridine diphospho-N-Acetylenolpyruvylglucosamine reductase (MurB), N-terminal domain	31	-16
1589	56187	d.145.1.3	CO dehydrogenase flavoprotein N-terminal domain-like	113	-79
1590	56195	d.146.1.1	Uridine diphospho-N-Acetylenolpyruvylglucosamine reductase, MurB, C-terminal domain	24	-18
1591	56200	d.147.1.1	Methenyltetrahydromethanopterin cyclohydrolase	20	-2
1592	56205	d.148.1.1	Hect, E3 ligase catalytic domain	37	-26
1593	56210	d.149.1.1	Nitrile hydratase alpha chain	24	-7
1594	54237	d.15.1.1	Ubiquitin-related	75	-54
1595	54250	d.15.1.2	UBX domain	20	-10
1596	54253	d.15.1.3	GABARAP-like	32	-33
1597	54256	d.15.1.4	First domain of FERM	29	-17
1598	54263	d.15.1.5	Ras-binding domain, RBD	21	-16
1599	75362	d.15.1.6	BM-002-like	23	-15
1600	81270	d.15.10.1	TGS domain	4	-4
1601	82583	d.15.10.2	G domain-linked domain	45	-37
1602	89838	d.15.11.1	Doublecortin (DC)	18	-28
1603	54278	d.15.2.1	CAD domain	21	-11
1604	64225	d.15.2.2	PB1 domain	22	-24
1605	54286	d.15.3.1	MoaD	6	-2
1606	54289	d.15.3.2	ThiS	4	0
1607	54293	d.15.4.1	2Fe-2S ferredoxin-related	60	-37
1608	54312	d.15.4.2	2Fe-2S ferredoxin domains from multidomain proteins	71	-38
1609	54365	d.15.8.1	Translation initiation factor IF3, N-terminal domain	26	-16
1610	54369	d.15.9.1	Glutamine synthetase, N-terminal domain	24	-10
1611	56215	d.150.1.1	4'-Phosphopantetheinyl transferase SFP	5	0
1612	64418	d.150.1.2	Holo-(acyl carrier protein) synthase ACPS	4	-6
1613	56220	d.151.1.1	DNase I-like	109	-81
1614	64422	d.151.1.2	Inositol polyphosphate 5-phosphatase (IPP5)	48	-38
1615	56229	d.152.1.1	Aldehyde ferredoxin oxidoreductase, N-terminal domain	76	-31
1616	56236	d.153.1.1	Class II glutamine amidotransferases	112	-70
1617	56244	d.153.1.2	Penicillin acylase, catalytic domain	70	-33
1618	56248	d.153.1.3	Penicillin V acylase	34	-12
1619	56251	d.153.1.4	Proteasome subunits	49	-57
1620	56261	d.153.1.5	(Glycosyl)asparaginase	94	-51
1621	75570	d.153.2.1	Archaeal IMP cyclohydrolase PurO	10	0
1622	56267	d.154.1.1	DmpA-like	45	-13
1623	111219	d.154.1.2	ArgJ-like	20	-31
1624	56272	d.155.1.1	Histidine decarboxylase	8	0
1625	90046	d.155.1.2	Arginine decarboxylase	6	-6
1626	56277	d.156.1.1	S-adenosylmethionine decarboxylase	32	-25
1627	111222	d.156.1.2	Bacterial S-adenosylmethionine decarboxylase	19	-8
1628	56282	d.157.1.1	Zn metallo-beta-lactamase	22	-8
1629	56288	d.157.1.2	Glyoxalase II (hydroxyacylglutathione hydrolase)	44	-40
1630	56291	d.157.1.3	ROO N-terminal domain-like	37	-19
1631	103317	d.157.1.4	Hypothetical protein TM0207	20	-22
1632	111227	d.157.1.5	Methyl parathion hydrolase	34	-6
1633	56301	d.159.1.1	Purple acid phosphatase-like	35	-27
1634	56307	d.159.1.2	5'-nucleotidase (syn. UDP-sugar hydrolase), N-terminal domain	35	-4
1635	56310	d.159.1.3	Protein serine/threonine phosphatase	67	-27
1636	64427	d.159.1.4	DNA double-strand break repair nuclease	6	-2
1637	82803	d.159.1.5	Phosphoesterase-related	4	0
1638	103320	d.159.1.6	TT1561-like	6	0
1639	111233	d.159.1.7	YfcE-like	24	-12
1640	54374	d.16.1.1	GMC oxidoreductases	26	-3
1641	54378	d.16.1.2	PHBH-like	53	-26
1642	54384	d.16.1.3	D-aminoacid oxidase-like	26	-8
1643	54394	d.16.1.5	L-aminoacid/polyamine oxidase	62	-26
1644	54399	d.16.1.6	GDI-like	39	-32
1645	69670	d.16.1.7	UDP-galactopyranose mutase	9	0
1646	56318	d.160.1.1	Nitrilase	71	-31
1647	64433	d.160.1.2	Carbamilase	24	-8
1648	56323	d.161.1.1	ADC synthase	61	-53
1649	56328	d.162.1.1	Lactate & malate dehydrogenases, C-terminal domain	97	-68
1650	90050	d.162.1.2	AglA-like glucosidase	40	-16
1651	56350	d.163.1.1	Lambda integrase-like, catalytic core	52	-51
1652	56361	d.163.1.2	Eukaryotic DNA topoisomerase I, catalytic core	33	-17
1653	56367	d.164.1.1	SMAD MH1 domain	28	-23
1654	56400	d.166.1.1	ADP-ribosylating toxins	4	0
1655	56416	d.166.1.2	Poly(ADP-ribose) polymerase, C-terminal domain	45	-25
1656	82814	d.166.1.3	Ecto-ART	17	-20
1657	56421	d.167.1.1	Peptide deformylase	55	-34
1658	56426	d.168.1.1	Succinate dehydrogenase/fumarate reductase flavoprotein, catalytic domain	88	-76
1659	56437	d.169.1.1	C-type lectin domain	29	-13
1660	56477	d.169.1.4	Link domain	18	-6
1661	56480	d.169.1.5	Endostatin	25	-18
1662	75585	d.169.1.6	Noncollagenous (NC1) domain of collagen IV	44	-30
1663	54407	d.17.1.2	Cystatins	23	-12
1664	82592	d.17.1.3	Cathelicidin motif	12	-4
1665	54417	d.17.2.1	Amine oxidase N-terminal region	35	-11
1666	54428	d.17.4.1	Scytalone dehydratase	6	-4
1667	102813	d.17.4.10	PhzA/PhzB-like	2	-2
1668	110829	d.17.4.12	PA1314-like	4	0
1669	54431	d.17.4.2	NTF2-like	41	-42
1670	54438	d.17.4.4	Ring hydroxylating beta subunit	21	0
1671	82598	d.17.4.6	Orange carotenoid protein, C-terminal domain	5	-4
1672	89851	d.17.4.7	Association domain of calcium/calmodulin-dependent protein kinase type II alpha subunit, CAMK2A	37	-20
1673	88803	d.17.6.1	Archaeosine tRNA-guanine transglycosylase, C2 domain	2	0
1674	110832	d.17.6.3	Nip7p homolog, N-terminal domain	18	-27
1675	102817	d.17.7.1	Putative dsDNA mimic	2	-2
1676	56488	d.170.1.1	Scavenger receptor cysteine-rich (SRCR) domain	64	-24
1677	103355	d.170.1.2	Hepsin, N-terminal domain	11	-9
1678	56492	d.170.2.1	A heparin-binding domain	23	-10
1679	56497	d.171.1.1	Fibrinogen C-terminal domain-like	47	-26
1680	56508	d.173.1.1	Methionine synthase SAM-binding domain	51	-31
1681	75590	d.173.1.2	Hypothetical protein TM0269	2	0
1682	56513	d.174.1.1	Nitric oxide (NO) synthase oxygenase domain	63	-21
1683	56520	d.175.1.1	Penicillin binding protein dimerisation domain	7	-10
1684	56525	d.176.1.1	Oxidoreductase molybdopterin-binding domain	90	-43
1685	56530	d.177.1.1	FAH	167	-120
1686	56535	d.178.1.1	Aromatic aminoacid monoxygenases, catalytic and oligomerization domains	58	-38
1687	56543	d.179.1.1	Substrate-binding domain of HMG-CoA reductase	60	-26
1688	54448	d.18.1.1	Transcriptional coactivator PC4 C-terminal domain	14	-7
1689	75375	d.18.1.2	Plant transcriptional regulator PBF-2	5	-7
1690	56554	d.181.1.1	Insert subdomain of RNA polymerase alpha subunit	18	-50
1691	56564	d.183.1.1	Major capsid protein gp5	22	-2
1692	90077	d.184.1.3	Ubiquinol-cytochrome c reductase 8 kDa protein	10	-2
1693	63412	d.185.1.1	MPP-like	69	-63
1694	64294	d.185.1.2	Autoinducer-2 production protein LuxS	20	-2
1695	64235	d.187.1.1	Photosystem I subunit PsaD	11	-2
1696	64264	d.188.1.1	Prokaryotic ribosomal protein L17	47	-37
1697	64269	d.189.1.1	PX domain	27	-30
1698	54453	d.19.1.1	MHC antigen-recognition domain	31	-19
1699	64289	d.190.1.1	Chorismate lyase	2	-2
1700	64377	d.192.1.1	YlxR-like	2	-6
1701	64398	d.193.1.1	Hsp33 domain	4	-2
1702	111238	d.194.1.2	YfiH-like	32	-22
1703	68931	d.197.1.1	Protein-L-isoaspartyl O-methyltransferase, C-terminal domain	2	0
1704	69646	d.198.2.1	Arp2/3 complex subunits	43	-21
1705	53956	d.2.1.1	Family 19 glycosidase	49	-6
1706	53960	d.2.1.2	C-type lysozyme	35	-29
1707	53984	d.2.1.4	Lambda lysozyme	14	0
1708	53987	d.2.1.5	G-type lysozyme	21	-18
1709	53991	d.2.1.6	Bacterial muramidase, catalytic domain	33	-21
1710	53996	d.2.1.7	Chitosanase	12	0
1711	54496	d.20.1.1	UBC-related	41	-19
1712	75383	d.20.1.2	UEV domain	27	-18
1713	110843	d.20.1.3	RWD domain	15	-5
1714	69688	d.200.1.1	Integrin beta tail domain	13	-8
1715	69696	d.201.1.1	SRP19	22	-12
1716	69706	d.202.1.1	Transcription factor NusA, N-terminal domain	26	-18
1717	69722	d.203.1.1	DsrC, the gamma subunit of dissimilatory sulfite reductase	15	-6
1718	69755	d.204.1.1	Ribosome binding protein Y (YfiA homologue)	6	0
1719	69762	d.205.1.1	GTP cyclohydrolase I feedback regulatory protein, GFRP	7	-8
1720	69787	d.206.1.1	YggU-like	8	-2
1721	69797	d.207.1.1	Thymidylate synthase-complementing protein Thy1	26	-10
1722	69820	d.208.1.1	MTH1598-like	16	-2
1723	69849	d.209.1.1	LCCL domain	11	-8
1724	54507	d.21.1.1	Diaminopimelate epimerase	41	-18
1725	89863	d.21.1.2	PhzC/PhzF-like	96	-37
1726	110863	d.21.1.3	Proline racemase	87	-22
1727	69865	d.210.1.1	Argininosuccinate synthetase, C-terminal domain	29	-38
1728	48404	d.211.1.1	Ankyrin repeat	119	-74
1729	75400	d.211.2.1	Plakin repeat	37	-24
1730	55217	d.212.1.1	TolA	4	0
1731	64326	d.212.1.2	TonB	2	0
1732	75413	d.214.1.1	Hypothetical protein MTH1880	2	0
1733	75554	d.215.1.1	Smc hinge domain	16	-12
1734	63764	d.217.1.1	SAND domain	21	-9
1735	82611	d.217.1.2	SMAD4-binding domain of oncoprotein Ski	26	-19
1736	81300	d.218.1.2	DNA polymerase beta-like	50	-19
1737	81589	d.218.1.3	Poly(A) polymerase, PAP, N-terminal domain	39	-22
1738	82661	d.218.1.4	Poly A polymerase head domain-like	56	-30
1739	102937	d.218.1.6	2'-5'-oligoadenylate synthetase 1, OAS1, N-terminal domain	17	-17
1740	102940	d.218.1.7	Archaeal tRNA CCA-adding enzyme catalytic domain	8	-4
1741	102945	d.218.1.8	RelA/SpoT domain	29	-12
1742	110933	d.218.1.9	GlnE-like domain	18	-7
1743	81605	d.219.1.1	PP2C-like	44	-27
1744	64244	d.22.1.2	Domain G2 of nidogen-1	24	-14
1745	81659	d.220.1.1	Metal cation-transporting ATPase, ATP-binding domain N	47	-37
1746	82603	d.221.1.1	Nuclease A inhibitor (NuiA)	6	0
1747	82608	d.222.1.1	YbaB-like	6	0
1748	82616	d.223.1.1	Swapped Polo-box domain	12	-8
1749	102856	d.223.1.2	Polo-box duplicated region	26	-22
1750	82650	d.224.1.1	SufE-like	17	-18
1751	102928	d.224.1.2	NifU/IscU domain	72	-56
1752	82715	d.225.1.1	Multidrug efflux transporter AcrB TolC docking domain; DN and DC subdomains	83	-34
1753	82785	d.227.1.1	Ohr/OsmC resistance proteins	38	-47
1754	90027	d.227.1.2	YhfA-like	8	-6
1755	82809	d.228.1.1	Replication modulator SeqA, C-terminal DNA-binding domain	2	0
1756	82830	d.229.1.1	MesJ substrate recognition domain-like	2	0
1757	54519	d.23.1.1	Transcriptional factor tubby, C-terminal domain	36	-22
1758	88799	d.230.1.1	N-terminal, heterodimerisation domain of RBP7 (RpoE)	2	0
1759	89808	d.230.2.1	Dodecin-like	2	0
1760	89812	d.230.3.1	Amyloid beta a4 protein copper binding domain (domain 2)	14	-10
1761	89818	d.232.1.1	Mago nashi protein	33	-24
1762	89873	d.233.1.1	Inhibitor of vertebrate lysozyme, Ivy	11	-2
1763	89891	d.234.1.1	Proguanylin	4	-12
1764	89896	d.235.1.1	Hypothetical protein Yhr087W	2	-4
1765	90003	d.237.1.1	Hypothetical protein YjiA, C-terminal domain	2	0
1766	90065	d.238.1.1	Hypothetical protein TM0875	2	0
1767	90074	d.239.1.1	GCM domain	13	-8
1768	54524	d.24.1.1	Pilin	5	0
1769	100880	d.240.1.1	Lesion bypass DNA polymerase (Y-family), little finger domain	27	-20
1770	100967	d.241.1.1	Translation initiation factor 2 beta, aIF2beta, N-terminal domain	6	0
1771	102736	d.241.2.1	Trigger factor ribosome-binding domain	12	-8
1772	102825	d.243.1.1	Colicin D nuclease domain	4	0
1773	102830	d.244.1.1	Cell division protein ZapA-like	2	0
1774	102849	d.245.1.1	NSFL1 (p97 ATPase) cofactor p47, SEP domain	14	-5
1775	102861	d.246.1.1	mRNA decapping enzyme DcpS N-terminal domain	10	-19
1776	102876	d.247.1.1	Chromosomal protein MC1	5	-1
1777	102887	d.248.1.1	Coproporphyrinogen III oxidase	41	-22
1778	102892	d.249.1.1	Hypothetical protein Ta1206	2	0
1779	54530	d.25.1.1	Mitochondrial glycoprotein MAM33-like	10	-12
1780	103026	d.250.1.1	Aminomethyltransferase folate-binding domain	102	-75
1781	103033	d.251.1.1	Hypothetical protein YwqG	15	-6
1782	103040	d.252.1.1	CheC-like	2	0
1783	103166	d.256.1.1	Ta1353-like	44	-12
1784	103257	d.257.1.1	Hypothetical protein TM0160	28	-4
1785	103264	d.258.1.1	Chorismate synthase, AroC	17	-15
1786	54535	d.26.1.1	FKBP immunophilin/proline isomerase	136	-65
1787	54549	d.26.1.2	GreA transcript cleavage factor, C-terminal domain	6	-4
1788	54557	d.26.3.1	Chitinase insertion domain	47	-23
1789	103360	d.260.1.1	Suppressor of Fused, N-terminal domain	15	-5
1790	103366	d.261.1.1	Hypothetical protein PH1602	84	-53
1791	103371	d.262.1.1	NinB	4	0
1792	89976	d.263.1.1	Hypothetical protein Yml108w	2	-2
1793	56748	d.264.1.1	PriA-like	10	0
1794	103305	d.264.1.2	Bifunctional DNA primase/polymerase N-terminal domain	5	0
1795	55121	d.265.1.1	Pseudouridine synthase I TruA	27	-23
1796	69746	d.265.1.2	Pseudouridine synthase II TruB	41	-23
1797	75459	d.265.1.3	Pseudouridine synthase RsuA/RluD	81	-67
1798	103021	d.265.1.4	tRNA pseudouridine synthase TruD	13	-11
1799	110853	d.268.1.2	Hypothetical protein PF0380	4	0
1800	110858	d.269.1.1	Gamma-glutamyl cyclotransferase-like	22	-22
1801	54566	d.27.1.1	Ribosomal protein S16	11	-2
1802	110922	d.270.1.1	2-isopropylmalate synthase LeuA, allosteric (dimerisation) domain	8	-2
1803	110943	d.271.1.1	HSP90 C-terminal domain	11	-12
1804	111007	d.272.1.1	Dystroglycan, domain 2	11	-7
1805	111039	d.273.1.1	YjbQ-like	32	-36
1806	111058	d.274.1.1	Hypothetical protein PF0899	2	0
1807	111065	d.275.1.1	Hut operon positive regulatory protein HutP	6	0
1808	111127	d.278.1.1	H-NOX domain	2	-12
1809	111149	d.279.1.1	YggX-like	4	-2
1810	54571	d.28.1.1	Ribosomal protein S19	16	-8
1811	111250	d.280.1.1	Sulfolobus fructose-1,6-bisphosphatase-like	26	-10
1812	111279	d.282.1.1	SSo0622-like	7	-2
1813	111284	d.283.1.1	Putative modulator of DNA gyrase, PmbA/TldD	68	-34
1814	82698	d.284.1.1	PurS subunit of FGAM synthetase	6	0
1815	111002	d.284.1.2	FGAM synthase PurL, PurS-like domain	19	-2
1816	54576	d.29.1.1	Ribosomal protein L31e	2	0
1817	54002	d.3.1.1	Papain-like	65	-55
1818	110773	d.3.1.11	Ubiquitin thiolesterase protein OTUB2 (Otubain-2)	33	-23
1819	54040	d.3.1.3	Calpain large subunit, catalytic domain (domain II)	64	-34
1820	54044	d.3.1.4	Transglutaminase core	26	-17
1821	54047	d.3.1.5	Arylamine N-acetyltransferase	57	-14
1822	54050	d.3.1.6	Ubiquitin carboxyl-terminal hydrolase UCH-L	40	-11
1823	54054	d.3.1.7	Adenain-like	57	-35
1824	82568	d.3.1.9	Ubiquitin carboxyl-terminal hydrolase, UCH	41	-44
1825	54581	d.30.1.1	Allophycocyanin linker chain (domain)	2	-4
1826	54586	d.31.1.1	Cdc48 domain 2-like	36	-18
1827	54594	d.32.1.1	Glyoxalase I (lactoylglutathione lyase)	46	-44
1828	54598	d.32.1.2	Antibiotic resistance proteins	34	-2
1829	54602	d.32.1.3	Extradiol dioxygenases	100	-67
1830	64257	d.32.1.4	Methylmalonyl-CoA epimerase	6	-2
1831	75396	d.32.1.5	Hypothetical protein YecM (EC4020)	2	-4
1832	110880	d.32.1.6	Hypothetical protein BC1747	18	-2
1833	110883	d.32.1.7	3-demethylubiquinone-9 3-methyltransferase	54	-19
1834	110888	d.32.1.8	Hypothetical protein YycE	4	-4
1835	54612	d.33.1.1	Bacterial protein-export protein SecB	13	-2
1836	54617	d.34.1.1	DNA-binding domain of Mlu1-box binding protein MBP1	9	-9
1837	54622	d.35.1.1	Heme-binding protein A (HasA)	2	0
1838	54627	d.36.1.1	Chalcone isomerase	7	-1
1839	54632	d.37.1.1	CBS-domain pair	29	-16
1840	54638	d.38.1.1	4HBT-like	37	-9
1841	54641	d.38.1.2	beta-Hydroxydecanol thiol ester dehydrase	13	-10
1842	54644	d.38.1.3	Acyl-CoA thioesterase	71	-21
1843	82636	d.38.1.4	MaoC-like	24	-4
1844	89902	d.38.1.5	PaaI/YdiI-like	44	-26
1845	110902	d.38.1.6	FabZ-like	34	-32
1846	54649	d.39.1.1	DLC	55	-27
1847	54061	d.4.1.1	HNH-motif	8	0
1848	54066	d.4.1.2	DNA/RNA non-specific endonuclease	10	0
1849	102726	d.4.1.6	Endonuclease I	18	0
1850	110778	d.4.1.7	Caspase-activated DNase, CAD (DffB, DFF40)	16	-20
1851	54666	d.41.1.1	CO dehydrogenase molybdoprotein N-domain-like	121	-52
1852	54676	d.41.2.1	NadC N-terminal domain-like	10	-8
1853	110907	d.41.2.2	Monomeric nicotinate phosphoribosyltransferase N-terminal domain-like	11	-2
1854	110910	d.41.2.3 changed to c.1.17.2	Monomeric nicotinate phosphoribosyltransferase C-terminal domain	34	-18
1855	54681	d.41.3.1	Pyrimidine nucleoside phosphorylase C-terminal domain	19	-7
1856	54687	d.41.4.1	Ribosomal protein L10e	38	-30
1857	54691	d.41.5.1	Molybdopterin synthase subunit MoaE	17	-16
1858	54696	d.42.1.1	BTB/POZ domain	36	-19
1859	54701	d.42.1.2	Tetramerization domain of potassium channels	36	-21
1860	54714	d.43.1.1	Elongation factor Ts (EF-Ts), dimerisation domain	30	-39
1861	54720	d.44.1.1	Fe,Mn superoxide dismutase (SOD), C-terminal domain	82	-77
1862	54737	d.45.1.1	Ribosomal protein L7/12, C-terminal domain	16	-14
1863	82641	d.45.1.2	Adaptor protein ClpS (YljA)	8	-14
1864	54748	d.47.1.1	Ribosomal L11/L12e N-terminal domain	47	-16
1865	54753	d.48.1.1	RecA protein, C-terminal domain	4	-4
1866	54763	d.49.1.1	Signal recognition particle alu RNA binding heterodimer, SRP9/14	26	-11
1867	54077	d.5.1.1	Ribonuclease A-like	21	-18
1868	54769	d.50.1.1	Double-stranded RNA-binding domain (dsRBD)	27	-22
1869	54778	d.50.1.2	Ribosomal S5 protein, N-terminal domain	12	-4
1870	82645	d.50.1.3	The homologous-pairing domain of Rad52 recombinase	14	-17
1871	54783	d.50.2.1	Porphobilinogen deaminase (hydroxymethylbilane synthase), C-terminal domain	10	-8
1872	54787	d.50.3.1	PI-Pfui intein middle domain	2	0
1873	110917	d.50.4.1	Peptidyl-tRNA hydrolase domain	21	-19
1874	54792	d.51.1.1	Eukaryotic type KH-domain (KH-domain type I)	50	-30
1875	54811	d.52.2.1	GMP synthetase C-terminal dimerisation domain	70	-36
1876	54815	d.52.3.1	Prokaryotic type KH domain (KH-domain type II)	40	-40
1877	75421	d.52.4.1	YhbC-like, N-terminal domain	2	0
1878	82654	d.52.5.1	Probable GTPase Der, C-terminal domain	2	0
1879	82658	d.52.6.1	BolA-like	23	-22
1880	89920	d.52.7.1	Ribosome-binding factor A, RbfA	10	-4
1881	54822	d.53.1.1	Ribosomal protein S3 C-terminal domain	10	-2
1882	54827	d.54.1.1	Enolase N-terminal domain-like	101	-78
1883	54844	d.55.1.1	Ribosomal protein L22	33	-28
1884	54850	d.56.1.1	GroEL-like chaperone, intermediate domain	6	0
1885	54853	d.56.1.2	Group II chaperonin (CCT, TRIC), intermediate domain	5	-2
1886	54858	d.57.1.1	DNA damage-inducible protein DinI	2	0
1887	54870	d.58.1.2	7-Fe ferredoxin	25	-20
1888	54874	d.58.1.3	Archaeal ferredoxins	3	0
1889	54877	d.58.1.4	Single 4Fe-4S cluster ferredoxin	7	-8
1890	54884	d.58.1.5	Ferredoxin domains from multidomain proteins	109	-75
1891	54976	d.58.10.1	Acylphosphatase-like	39	-21
1892	54981	d.58.11.1	EF-G/eEF-2 domains III and V	73	-67
1893	54985	d.58.12.1	eEF-1beta-like	45	-30
1894	54996	d.58.14.1	Ribosomal protein S6	2	-2
1895	55000	d.58.15.1	Ribosomal protein S10	14	-8
1896	55004	d.58.16.1	Poly(A) polymerase, PAP, C-terminal domain	25	-22
1897	55009	d.58.17.1	HMA, heavy metal-associated domain	54	-24
1898	55022	d.58.18.1	Phosphoglycerate dehydrogenase, regulatory (C-terminal) domain	2	0
1899	55025	d.58.18.2	Allosteric threonine deaminase C-terminal domain	11	-8
1900	55028	d.58.18.3	Phenylalanine metabolism regulatory domain	7	-6
1901	102999	d.58.18.4	Nickel responsive regulator NikR, C-terminal domain	6	0
1902	110980	d.58.18.5	Glycine cleavage system transcriptional repressor	3	-3
1903	55032	d.58.19.1	Bacterial exopeptidase dimerisation domain	24	-8
1904	54894	d.58.2.1	Aspartate carbamoyltransferase, Regulatory-chain, N-terminal domain	24	-6
1905	55036	d.58.20.1	NAD-binding domain of HMG-CoA reductase	50	-30
1906	55041	d.58.21.1	Molybdenum cofactor biosynthesis protein C, MoaC	59	-51
1907	55045	d.58.22.1	TRADD, N-terminal domain	8	-8
1908	55049	d.58.23.1	Probable ACP-binding domain of malonyl-CoA ACP transacylase	10	-8
1909	55053	d.58.24.1	CheY-binding domain of CheA	6	0
1910	55061	d.58.26.1	Homoserine kinase	2	0
1911	64281	d.58.26.2	Mevalonate 5-diphosphate decarboxylase	26	-27
1912	75450	d.58.26.3	Mevalonate kinase	18	-15
1913	89950	d.58.26.5	4-(cytidine 5'-diphospho)-2C-methyl-D-erythritol kinase IspE	6	-2
1914	103011	d.58.26.7	Galactokinase	14	-14
1915	55069	d.58.28.1	Peptide methionine sulfoxide reductase	88	-59
1916	55074	d.58.29.1	Adenylyl and guanylyl cyclase catalytic domain	80	-31
1917	54898	d.58.3.1	Pancreatic carboxypeptidase, activation domain	21	-12
1918	54905	d.58.3.2	Subtilase propeptides/inhibitors	4	-4
1919	75431	d.58.3.3	Prohormone convertase 1 pro-domain	4	-8
1920	55084	d.58.30.1	6-hydroxymethyl-7,8-dihydropterin pyrophosphokinase, HPPK	56	-52
1921	55089	d.58.31.1	Methyl-coenzyme M reductase gamma chain	6	-3
1922	55094	d.58.31.2	Methyl-coenzyme M reductase alpha and beta chain N-terminal domain	11	-5
1923	55104	d.58.32.1	Vanillyl-alcohol oxidase-like	28	-4
1924	55109	d.58.32.2	D-lactate dehydrogenase	30	-4
1925	64284	d.58.32.3	Cholesterol oxidase	6	-2
1926	110990	d.58.32.4	Cytokinin dehydrogenase 1	8	-4
1927	55113	d.58.33.1	Formylmethanofuran:tetrahydromethanopterin formyltransferase	31	-5
1928	55117	d.58.34.1	Formiminotransferase domain of formiminotransferase-cyclodeaminase.	46	-14
1929	55125	d.58.36.1	Duplicated SiR/NiR-like domains 1 and 3	9	-4
1930	69738	d.58.38.1	Urease metallochaperone UreE, C-terminal domain	6	-2
1931	69743	d.58.39.1	Glutamyl tRNA-reductase catalytic, N-terminal domain	4	0
1932	54910	d.58.4.1	Muconalactone isomerase, MLI	21	-4
1933	110965	d.58.4.10	Chlorite dismutase-like	10	0
1934	69733	d.58.4.2	Lrp/AsnC-like transcriptional regulator C-terminal domain	5	0
1935	89927	d.58.4.4	Plant stress-induced protein	9	-1
1936	102959	d.58.4.5	PG130-like	11	0
1937	102962	d.58.4.6	Hypothetical protein YjcS	2	0
1938	102965	d.58.4.7	YciI-like	6	-4
1939	110962	d.58.4.9	DGPF domain (Pfam 04946)	6	0
1940	75446	d.58.40.1	D-ribose-5-phosphate isomerase (RpiA), lid domain	14	-8
1941	82672	d.58.41.1	SEA domain	14	-4
1942	82680	d.58.42.1	N-utilization substance G protein NusG, N-terminal domain	22	-20
1943	82690	d.58.43.1	Mechanosensitive channel protein MscS (YggB), C-terminal domain	8	0
1944	82694	d.58.44.1	Multidrug efflux transporter AcrB pore domain; PN1, PN2, PC1 and PC2 subdomains	93	-46
1945	89943	d.58.46.1	eEF1-gamma domain	37	-24
1946	89947	d.58.47.1	Hypothetical protein VC0424	3	0
1947	89958	d.58.48.1	MTH1187-like	26	-8
1948	110987	d.58.48.2	Putative thiamin/HMP-binding protein YkoF	4	0
1949	89964	d.58.49.1	YajQ-like	11	-8
1950	54914	d.58.5.1	Prokaryotic signal transducing protein	53	-30
1951	75434	d.58.5.2	Divalent ion tolerance proteins CutA (CutA1)	83	-41
1952	88851	d.58.5.3	ATP phosphoribosyltransferase (ATP-PRTase, HisG), regulatory C-terminal domain	4	-6
1953	89934	d.58.5.4	DUF190/COG1993	4	0
1954	110994	d.58.51.1	eIF-2-alpha, C-terminal domain	19	-22
1955	110998	d.58.52.1	Sporulation related repeat	2	0
1956	54920	d.58.6.1	Nucleoside diphosphate kinase, NDK	47	-62
1957	54929	d.58.7.1	Canonical RBD	57	-37
1958	54954	d.58.7.2	Non-canonical RBD domain	23	-15
1959	64276	d.58.7.3	Splicing factor U2AF subunits	12	-16
1960	102987	d.58.7.4	Smg-4/UPF3	23	-11
1961	54967	d.58.9.1	Ribulose 1,5-bisphosphate carboxylase-oxygenase	42	-21
1962	55130	d.59.1.1	Ribosomal protein L30p/L7e	8	-2
1963	54099	d.6.1.1	Prion-like	11	-7
1964	55140	d.60.1.2	Rob transcription factor, C-terminal domain	2	0
1965	75462	d.60.1.3	Gyrase inhibitory protein GyrI (SbmC, YeeB)	2	0
1966	55145	d.61.1.1	tRNA splicing product Appr>p cyclic nucleotide phosphodiesterase	5	-3
1967	89967	d.61.1.2	2'-5' RNA ligase LigT	2	0
1968	103043	d.61.1.3	2',3'-cyclic nucleotide 3'-phosphodiesterase, catalytic domain	12	-11
1969	55155	d.63.1.1	mRNA triphosphatase CET1	7	-3
1970	55160	d.64.1.1	eIF1-like	51	-23
1971	55167	d.65.1.1	Muramoyl-pentapeptide carboxypeptidase	3	-2
1972	55170	d.65.1.2	Hedgehog (development protein), N-terminal signaling domain	16	-13
1973	111019	d.65.1.3	MepA-like	12	-2
1974	111022	d.65.1.4	VanX-like	19	-4
1975	55178	d.66.1.2	Ribosomal protein S4	21	-6
1976	55182	d.66.1.3	Heat shock protein 15 kD	10	-4
1977	75465	d.66.1.4	Tyrosyl-tRNA synthetase (TyrRS), C-terminal domain	6	-4
1978	103046	d.66.1.6	YbcJ-like	2	0
1979	55187	d.67.1.1	Threonyl-tRNA synthetase (ThrRS), second 'additional' domain	52	-49
1980	103051	d.67.1.2	AlaX-like	6	-4
1981	55191	d.67.2.1	Arginyl-tRNA synthetase (ArgRS), N-terminal 'additional' domain	11	-5
1982	55195	d.67.3.1	Ribosome recycling factor, RRF	28	-12
1983	103055	d.67.4.1	General secretion pathway protein M, EpsM	2	-2
1984	55201	d.68.1.1	Translation initiation factor IF3, C-terminal domain	21	-32
1985	55206	d.68.2.1	RNA 3'-terminal phosphate cyclase, RPTC	74	-32
1986	55209	d.68.2.2	Enolpyruvate transferase, EPT	60	-32
1987	88852	d.68.3.3	SirA-like	16	-4
1988	75472	d.68.4.1	YhbY-like	16	-2
1989	64587	d.68.5.1	C-terminal domain of ProRS	6	0
1990	82705	d.68.6.1	DNA-binding protein AlbA	12	-6
1991	111027	d.68.6.2	Hypothetical protein At2g34160	6	-3
1992	82709	d.68.7.1	R3H domain	16	-11
1993	55230	d.71.1.1	Cell division protein MinE topological specificity domain	2	0
1994	55235	d.72.1.1	Cyanase C-terminal domain	14	0
1995	55240	d.73.1.1	RuBisCO, small subunit	33	-22
1996	55249	d.74.1.1	PCD-like	45	-14
1997	55253	d.74.2.1	C-terminal domain of arginine repressor	6	-2
1998	55258	d.74.3.1	RNA polymerase alpha subunit dimerisation domain	15	-12
1999	64311	d.74.3.2	RBP11/RpoL	12	-2
[truncated: 263 more rows]
