# Supplementary material for: Global Patterns of Protein Domain Gain and Loss in Superkingdoms
Source: PLoS Comput Biol. 2014 Jan 30;10(1):e1003452. doi: 10.1371/journal.pcbi.1003452 (PMC3907288; doi:10.1371/journal.pcbi.1003452)
Supplement: Dataset S3 — Names, SCOP css, and the number of times each of the 2,249 parsimony informative FFs was gained/lost in occurrence reconstruction. Eight FFs from the 420-proteome dataset were given new ids in SCOP 1.75 and were therefore renamed. (XLS) [file pcbi.1003452.s003.xls]

## Sheet: Table2.txt
No.	SCOP Id	SCOP css	Description	Gains	Losses
1	46459	a.1.1.1	Truncated hemoglobin	6	0
2	46463	a.1.1.2	Globins	31	-13
3	46532	a.1.1.3	Phycocyanin-like phycobilisome proteins	2	0
4	46549	a.1.2.1	Fumarate reductase/Succinate dehydogenase iron-sulfur protein, C-terminal domain	13	-16
5	46553	a.1.2.2	Dihydropyrimidine dehydrogenase, N-terminal domain	7	-5
6	48180	a.100.1.1	Hydroxyisobutyrate and 6-phosphogluconate dehydrogenase domain	13	-31
7	48184	a.100.1.2	Acetohydroxy acid isomeroreductase (ketol-acid reductoisomerase, KARI)	4	-22
8	48187	a.100.1.3	HCDH C-domain-like	17	-15
9	48191	a.100.1.4	UDP-glucose/GDP-mannose dehydrogenase dimerisation domain	20	-10
10	48194	a.100.1.5	N-(1-D-carboxylethyl)-L-norvaline dehydrogenase	3	-2
11	48197	a.100.1.6	Glycerol-3-phosphate dehydrogenase	10	-19
12	69084	a.100.1.7	Ketopantoate reductase PanE	6	0
13	81843	a.100.1.9	Mannitol 2-dehydrogenase	24	-6
14	48202	a.101.1.1	Uteroglobin-like	4	0
15	48209	a.102.1.1	Glucoamylase	3	-1
16	48213	a.102.1.2	Cellulases catalytic domain	32	-11
17	48222	a.102.1.3	N-acylglucosamine (NAG) epimerase	10	-6
18	63588	a.102.1.4	Glycosyltransferase family 36 C-terminal domain	40	-26
19	81850	a.102.1.5	Bacterial glucoamylase C-terminal domain-like	15	-3
20	89108	a.102.1.6	Hypothetical protein YteR	12	-4
21	109953	a.102.1.7	Glycosyl Hydrolase Family 88	21	-2
22	48226	a.102.2.1	Class I alpha-1;2-mannosidase, catalytic domain	3	-1
23	48231	a.102.3.1	Alginate lyase A1-III	1	0
24	48234	a.102.3.2	Hyaluronate lyase-like catalytic, N-terminal domain	5	0
25	48240	a.102.4.1	Terpenoid cyclase N-terminal domain	1	-1
26	48243	a.102.4.2	Terpene synthases	27	-8
27	48246	a.102.4.3	Protein prenyltransferases	1	0
28	48251	a.102.4.4	Complement components	2	-1
29	81854	a.102.5.1	Family 10 polysaccharide lyase	5	0
30	48257	a.103.1.1	Citrate synthase	9	-10
31	48265	a.104.1.1	Cytochrome P450	22	-12
32	48301	a.108.1.1	Ribosomal protein L7/12, oligomerisation (N-terminal) domain	1	0
33	48306	a.109.1.1	Class II MHC-associated invariant chain ectoplasmic trimerization domain	1	-6
34	47028	a.11.1.1	Acyl-CoA binding protein	7	-13
35	47032	a.11.2.1	Second domain of FERM	1	-1
36	48311	a.110.1.1	Aldehyde ferredoxin oxidoreductase, C-terminal domains	15	-11
37	48318	a.111.1.1	Type 2 phosphatidic acid phosphatase, PAP2	11	0
38	48321	a.111.1.2	Haloperoxidase (bromoperoxidase)	4	-2
39	48325	a.111.1.3	Chloroperoxidase	2	0
40	48335	a.113.1.1	DNA repair protein MutS, domain III	9	-10
41	48341	a.114.1.1	Interferon-induced guanylate-binding protein 1 (GBP1), C-terminal domain	1	0
42	48351	a.116.1.1	BCR-homology GTPase activation domain (BH-domain)	6	-5
43	48360	a.116.1.2	p120GAP domain-like	4	-1
44	48367	a.117.1.1	Ras GEF	2	-2
45	48372	a.118.1.1	Armadillo repeat	1	0
46	74771	a.118.1.10	Clathrin adaptor core protein	1	0
47	89129	a.118.1.13	PHAT domain	1	-1
48	100908	a.118.1.14	MIF4G domain-like	1	-1
49	101407	a.118.1.15	Mo25 protein	2	-4
50	109965	a.118.1.17	BC3264-like	3	0
51	109968	a.118.1.18	Eukaryotic translation initiation factor 3 subunit 12, eIF3k, N-terminal domain	4	-7
52	48385	a.118.1.2	HEAT repeat	1	-2
53	48390	a.118.1.3	Clathrin heavy chain proximal leg segment	1	-3
54	48393	a.118.1.4	Clathrin heavy-chain linker domain	1	-6
55	48396	a.118.1.5	Leucine-rich repeat variant	11	-3
56	48399	a.118.1.6	Phoshoinositide 3-kinase (PI3K) helical domain	8	-7
57	63608	a.118.1.7	Leukotriene A4 hydrolase C-terminal domain	6	-3
58	63611	a.118.1.8	Pumilio repeat	1	0
59	63614	a.118.1.9	Regulatory subunit H of the V-type ATPase	7	-7
60	48480	a.118.11.1	Cytochrome c oxidase subunit E	6	-5
61	69100	a.118.12.1	Ran-GTPase activating protein 1 (RanGAP1), C-terminal domain	1	-4
62	69104	a.118.13.1	Arp2/3 complex 16 kDa subunit ARPC5	2	-4
63	48030	a.118.14.1	FliG	10	-21
64	74779	a.118.15.1	Aconitase B, N-terminal domain	11	-9
65	74785	a.118.16.1	Translin	6	-10
66	74789	a.118.17.1	Cullin repeat	1	-2
67	81902	a.118.18.1	HCP-like	23	-4
68	101421	a.118.19.1	C-terminal domain of Ku80	2	-4
69	101425	a.118.20.1	Hypothetical protein ST1625	1	0
70	81898	a.118.21.1	Chemosensory protein Csp2	1	0
71	81895	a.118.22.1	IP3 receptor type 1 binding core, domain 2	2	-3
72	48426	a.118.3.1	Sec7 domain	1	-1
73	48432	a.118.4.1	Lipovitellin-phosvitin complex, superhelical domain	4	-3
74	48436	a.118.5.1	Bacterial muramidases	3	-4
75	48440	a.118.6.1	Protein prenylyltransferase	1	-1
76	48446	a.118.7.1	14-3-3 protein	1	-1
77	48453	a.118.8.1	Tetratricopeptide repeat (TPR)	17	-7
78	69094	a.118.8.2	Transcription factor MalT domain III	2	-2
79	48465	a.118.9.1	ENTH domain	4	-2
80	48468	a.118.9.2	VHS domain	4	0
81	100911	a.118.9.3	Phosphoinositide-binding clathrin adaptor, N-terminal domain	1	-3
82	109975	a.118.9.4	RPR domain (SMART 00582 )	4	0
83	48485	a.119.1.1	Plant lipoxigenases	1	-1
84	48489	a.119.1.2	Animal lipoxigenases	3	0
85	47041	a.12.1.1	Kix domain of CBP (creb binding protein)	1	-5
86	48499	a.121.1.1	Tetracyclin repressor-like, C-terminal domain	15	-1
87	48509	a.123.1.1	Nuclear receptor ligand-binding domain	1	0
88	48538	a.124.1.1	Phospholipase C	3	0
89	48543	a.124.1.2	P1 nuclease	8	-1
90	48553	a.126.1.1	Serum albumin-like	1	0
91	48558	a.127.1.1	L-aspartase/fumarase	1	-2
92	48572	a.127.1.2	HAL/PAL-like	35	-23
93	48577	a.128.1.1	Isoprenyl diphosphate synthases	1	-8
94	48580	a.128.1.2	Squalene synthase	3	-4
95	48583	a.128.1.3	Terpenoid cyclase C-terminal domain	1	-1
96	48586	a.128.1.4	Aristolochene/pentalenene synthase	4	-2
97	69113	a.128.1.5	Trichodiene synthase	2	-2
98	48593	a.129.1.1	GroEL chaperone, ATPase domain	6	-4
99	48596	a.129.1.2	Group II chaperonin (CCT, TRIC), ATPase domain	10	-3
100	47046	a.13.1.1	RAP domain	5	-1
101	48601	a.130.1.1	Dimeric chorismate mutase	1	0
102	48604	a.130.1.2	Allosteric chorismate mutase	1	-3
103	48614	a.132.1.1	Eukaryotic type heme oxygenase	16	-1
104	63627	a.132.1.2	Heme oxygenase HemO (PigA)	4	0
105	101458	a.132.1.3	TENA/THI-4	18	-4
106	101463	a.132.1.4	PqqC-like	17	-7
107	48620	a.133.1.1	Insect phospholipase A2	1	-3
108	48623	a.133.1.2	Vertebrate phospholipase A2	2	-1
109	63630	a.133.1.3	Prokaryotic phospholipase A2	2	0
110	48653	a.135.1.1	Tetraspanin	4	-3
111	101495	a.137.10.1	Stathmin	1	0
112	48667	a.137.2.1	Methanol dehydrogenase subunit	4	0
113	48671	a.137.3.1	Transducin (heterotrimeric G protein), gamma chain	1	-1
114	48675	a.137.4.1	Fe-only hydrogenase smaller subunit	1	0
115	48679	a.137.5.1	Moesin tail domain	6	0
116	69132	a.137.9.1	Quinohemoprotein amine dehydrogenase C chain	3	-1
117	48696	a.138.1.1	Cytochrome c3-like	2	-1
118	48707	a.138.1.2	Photosynthetic reaction centre (cytochrome subunit)	3	-1
119	48711	a.138.1.3	Di-heme elbow motif	19	-7
120	47051	a.14.1.1	VHP, Villin headpiece domain	1	-1
121	63452	a.140.1.1	LEM domain	1	-2
122	68907	a.140.2.1	SAP domain	2	0
123	63502	a.141.1.1	Frizzled cysteine-rich domain	1	0
124	63521	a.142.1.1	PTS-regulatory domain, PRD	8	-2
125	55294	a.143.1.2	RPB6	1	-12
126	63571	a.144.1.1	PABC (PABP) domain	6	-4
127	63593	a.145.1.1	Flagellar transcriptional activator FlhD	2	-1
128	63601	a.146.1.1	Telomeric repeat binding factor (TRF) dimerisation domain	1	-1
129	69037	a.147.1.1	Bcr-Abl oncoprotein oligomerization domain	5	-1
130	69061	a.148.1.1	Arp2/3 complex 21 kDa subunit ARPC3	4	-2
131	69066	a.149.1.1	RNase III catalytic domain-like	10	-17
132	47056	a.15.1.1	TAF(II)230 TBP-binding fragment	3	0
133	69119	a.152.1.1	AhpD	8	-5
134	101468	a.152.1.2	CMD-like	2	0
135	69126	a.153.1.1	Nuclear receptor coactivator interlocking domain	1	-4
136	81272	a.155.1.1	H-NS histone-like proteins	1	0
137	46947	a.156.1.1	Ribosomal protein S13	7	-2
138	81626	a.156.1.2	Middle domain of MutM-like DNA repair proteins	6	-2
139	81380	a.157.1.1	Skp1 dimerisation domain-like	4	-5
140	81381	a.158.1.1	F-box domain	2	-2
141	81600	a.159.1.1	Protein serine/threonine phosphatase 2C, C-terminal domain	1	-2
142	81699	a.159.2.1	FF domain	1	-2
143	109716	a.159.4.1	DEK C-terminal domain	1	-4
144	47064	a.16.1.2	Ribosomal protein S15	6	-18
145	47068	a.16.1.3	a tRNA synthase domain	1	-5
146	81630	a.160.1.1	Poly(A) polymerase, PAP, middle domain	1	-3
147	101271	a.160.1.2	2'-5'-oligoadenylate synthetase 1, OAS1, second domain	1	-1
148	101274	a.160.1.3	Archaeal tRNA CCA-adding enzyme substrate-binding domain	2	-1
149	81731	a.161.1.1	beta-catenin-interacting protein ICAT	2	-2
150	81768	a.162.1.1	Pre-protein crosslinking domain of SecA	4	-4
151	81784	a.164.1.1	C-terminal domain of DFF45/ICAD (DFF-C domain)	5	-2
152	81791	a.165.1.1	Myosin phosphatase inhibitor 17kDa protein, CPI-17	5	-4
153	81823	a.166.1.1	RuBisCo LSMT C-terminal, substrate-binding domain	1	-3
154	81828	a.167.1.1 changed to a.223.1.2	Porin chaperone SurA, peptide-binding domain	6	-1
155	81838	a.169.1.1	BEACH domain	1	-3
156	47073	a.17.1.1	p8-MTCP1	2	-1
157	81873	a.170.1.1	BRCA2 helical domain	4	-5
158	81879	a.171.1.1	BRCA2 tower domain	1	-5
159	81887	a.172.1.1	Helical scaffold and wing domains of SecA	4	-5
160	81892	a.173.1.1	Poly A polymerase C-terminal region-like	5	-9
161	81924	a.174.1.1	Double Clp-N motif	6	-4
162	81931	a.175.1.1	Orange carotenoid protein, N-terminal domain	2	-3
163	81936	a.176.1.1	N-terminal domain of bifunctional PutA protein	1	-13
164	88947	a.177.1.1	Sigma2 domain of RNA polymerase sigma factors	6	-3
165	89070	a.180.1.1	N-terminal, cytoplasmic domain of anti-sigmaE factor RseA	1	0
166	89083	a.181.1.1	Antibiotic binding domain of TipA-like multidrug resistance regulators	1	0
167	89096	a.182.1.1	GatB/YqeY domain	9	-31
168	89125	a.183.1.1	Nop domain	13	-6
169	89156	a.184.1.1	TorD-like	2	-5
170	101216	a.186.1.1	Circadian clock protein KaiA, C-terminal domain	1	-1
171	109836	a.186.1.2	Phosphoserine phosphatase RsbU, N-terminal domain	1	0
172	101225	a.187.1.1	HAND domain of the nucleosome remodeling ATPase ISWI	4	-3
173	101234	a.188.1.1	PWI domain	5	-17
174	101239	a.189.1.1	XPC-binding domain	1	-3
175	101263	a.191.1.1	Methenyltetrahydrofolate cyclohydrolase-like	10	0
176	101279	a.192.1.1	N-terminal domain of adenylylcyclase associated protein, CAP	2	-12
177	101284	a.193.1.1	GRIP domain	3	-1
178	101289	a.194.1.1	L27 domain	1	-2
179	101308	a.195.1.1	YutG-like	5	-2
180	101323	a.198.1.1	YcfC-like	2	-3
181	101328	a.199.1.1	YgfB-like	3	-4
182	46558	a.2.1.1	GreA transcript cleavage protein, N-terminal domain	9	-5
183	46610	a.2.11.1	Fe,Mn superoxide dismutase (SOD), N-terminal domain	11	-32
184	109636	a.2.14.1	DnaK suppressor protein DksA, alpha-hairpin domain	3	-1
185	46562	a.2.2.1	Ribosomal protein L29 (L29p)	3	-1
186	46566	a.2.3.1	Chaperone J-domain	23	-27
187	46576	a.2.4.1 changed to a.237.1.1	DNA polymerase III theta subunit-like	1	0
188	46580	a.2.5.1	Prefoldin	3	0
189	46586	a.2.6.1	HR1 repeat	3	-5
190	46590	a.2.7.1	Seryl-tRNA synthetase (SerRS)	1	0
191	46597	a.2.8.1	Eukaryotic DNA topoisomerase I, dispensable insert domain	1	-3
192	63427	a.20.1.2	MMP N-terminal domain	1	-3
193	101333	a.200.1.1	Hypothetical protein MTH393	1	-1
194	101354	a.203.1.1	Putative anticodon-binding domain of alanyl-tRNA synthetase (AlaRS)	6	-13
195	101387	a.204.1.1	Type II deoxyuridine triphosphatase	4	0
196	101392	a.205.1.1	Hsp90 co-chaperone CDC37	5	0
197	101400	a.206.1.1	P40 nucleoprotein	2	0
198	101448	a.207.1.1	Formin homology 2 domain (FH2 domain)	1	-4
199	101474	a.208.1.1	DhaL-like	24	-8
200	101479	a.209.1.1	ADP-ribosylglycohydrolase	24	-2
201	47096	a.21.1.1	HMG-box	6	-5
202	101490	a.210.1.1	Eukaryotic initiation factor 4f subunit eIF4g, eIF4e-binding domain	1	0
203	101340	a.211.1.1	HD domain	4	-2
204	48548	a.211.1.2	PDEase	2	-7
205	109855	a.213.1.1	YfiT-like putative metal-dependent hydrolases	5	-1
206	109860	a.214.1.1	NblA-like	1	0
207	109881	a.215.1.1	A middle domain of Talin 1	1	-3
208	109886	a.216.1.1	I/LWEQ domain	5	-1
209	109906	a.217.1.1	Surp module (SWAP domain)	3	-4
210	109916	a.219.1.1	Hypothetical protein YhaI	1	0
211	47114	a.22.1.1	Nucleosome core histones	1	0
212	47134	a.22.1.3	TBP-associated factors, TAFs	3	-8
213	109921	a.220.1.1	Hypothetical protein At3g22680	2	-1
214	109926	a.221.1.1	Lissencephaly-1 protein (Lis-1, PAF-AH alpha) N-terminal domain	1	-12
215	109994	a.222.1.1	VPS9 domain	7	-5
216	109999	a.223.1.1	TF C-terminus	2	0
217	110005	a.224.1.1	Glycolipid transfer protein, GLTP	7	-8
218	110015	a.226.1.1	Her-1	1	0
219	110020	a.227.1.1	ERO1-like	1	-9
220	110036	a.228.1.1	GDNF receptor-like	1	-2
221	47149	a.23.2.1	Diol dehydratase, gamma subunit	7	0
222	47158	a.23.4.1	Mitochondrial import receptor subunit Tom20	2	-8
223	68990	a.23.5.1	Hemolysin expression modulating protein HHA	1	0
224	47163	a.24.1.1	Apolipoprotein	1	-6
225	47227	a.24.10.1	Aerobic respiration control sensor protein, ArcB	1	0
226	47230	a.24.10.2	Phosphorelay protein-like	1	0
227	63512	a.24.10.3	Chemotaxis protein CheA P1 domain	11	0
228	47365	a.24.13.1	Domain of the SRP/SRP receptor G-proteins	9	0
229	68994	a.24.14.1	FAT domain of focal adhesion kinase	2	-2
230	69001	a.24.15.1	FAD-dependent thiol oxidase	7	-6
231	81740	a.24.16.2	Family 1 bi-partite nucleotidyltransferase subunit	1	-1
232	89022	a.24.16.3	HEPN domain	12	0
233	109767	a.24.16.4	Glutamine synthase adenylyltransferase GlnE, domain 2	5	-1
234	101113	a.24.18.1	Oxygen-evolving enhancer protein 3,	1	0
235	101117	a.24.19.1	Flagellar export chaperone FliS	5	-2
236	47171	a.24.2.1	Aspartate receptor, ligand-binding domain	1	0
237	69009	a.24.21.1	RecG, N-terminal domain	1	0
238	109771	a.24.22.1	Nickel-containing superoxide dismutase, NiSOD	3	-2
239	109776	a.24.23.1	Mannose-6-phosphate receptor binding protein 1 (Tip47), C-terminal domain	1	-3
240	109780	a.24.24.1	Domain from hypothetical 2610208m17rik protein	1	-1
241	47176	a.24.3.1	Cytochrome b562	1	0
242	47179	a.24.3.2	Cytochrome c'-like	13	-5
243	47213	a.24.7.1	FKBP12-rapamycin-binding domain of FKBP-rapamycin-associated protein (FRAP)	3	-11
244	47217	a.24.8.1	Proteasome activator	1	-1
245	47221	a.24.9.1	alpha-catenin/vinculin	2	0
246	47241	a.25.1.1	Ferritin	8	-32
247	47253	a.25.1.2	Ribonucleotide reductase-like	8	-13
248	100951	a.25.1.3	Manganese catalase (T-catalase)	18	-2
249	89029	a.25.2.1	Hypothetical protein Ta1238	1	0
250	89032	a.25.2.2	Cobalamin adenosyltransferase	20	-25
251	47267	a.26.1.1	Long-chain cytokines	1	0
252	47286	a.26.1.2	Short-chain cytokines	1	0
253	47305	a.26.1.3	Interferons/interleukin-10 (IL-10)	1	-2
254	47324	a.27.1.1	Anticodon-binding domain of a subclass of class I aminoacyl-tRNA synthetases	9	-13
255	47337	a.28.1.1	Acyl-carrier protein (ACP)	10	-3
256	47346	a.28.2.1	Colicin E immunity proteins	2	0
257	47371	a.29.2.1	Bromodomain	4	-5
258	47204	a.29.3.1	Medium chain acyl-CoA dehydrogenase-like, C-terminal domain	11	-19
259	74714	a.29.3.2	acyl-CoA oxidase C-terminal domains	1	-10
260	69013	a.29.5.1	alpha-ketoacid dehydrogenase kinase, N-terminal domain	7	-10
261	101149	a.29.6.1	Plant invertase/pectin methylesterase inhibitor	1	-2
262	101153	a.29.7.1	Mob1/phocein	1	-5
263	46627	a.3.1.1	monodomain cytochrome c	12	-6
264	46671	a.3.1.2	N-terminal (heme c) domain of cytochrome cd1-nitrite reductase	9	-1
265	46676	a.3.1.3	Cytochrome bc1 domain	4	-12
266	46680	a.3.1.4	Two-domain cytochrome c	2	-1
267	46685	a.3.1.5	Di-heme cytochrome c peroxidase	30	-7
268	68952	a.3.1.6	Quinoprotein alcohol dehydrogenase, C-terminal domain	2	0
269	68956	a.3.1.7	Quinohemoprotein amine dehydrogenase A chain, domains 1 and 2	2	-1
270	81677	a.3.1.8	Di-heme cytochrome c SoxA	2	-1
271	47385	a.30.2.1	Homodimeric domain of signal transducing histidine kinase	3	0
272	101161	a.30.4.1	Dimerisation domain of CENP-B	2	-2
273	47397	a.32.1.1	Transcription factor IIA (TFIIA), alpha-helical domain	2	-8
274	109806	a.34.4.1	Adapter protein APS, dimerisation domain	3	-3
275	47414	a.35.1.1	POU-specific domain	1	-2
276	47435	a.35.1.4	Cyanase N-terminal domain	2	0
277	47447	a.36.1.1	Signal peptide-binding domain	15	-30
278	47455	a.37.1.1	A DNA-binding domain in eukaryotic transcription factors	1	0
279	47460	a.38.1.1	HLH, helix-loop-helix DNA-binding domain	4	-1
280	47478	a.39.1.2	S100 proteins	1	0
281	47489	a.39.1.3	Osteonectin	3	0
282	47492	a.39.1.4	Parvalbumin	1	-4
283	47502	a.39.1.5	Calmodulin-like	2	0
284	47543	a.39.1.6	Eps15 homology domain (EH domain)	2	-3
285	47547	a.39.1.7	EF-hand modules in multidomain proteins	1	-2
286	63550	a.39.1.8	Penta-EF-hand proteins	6	-6
287	47566	a.39.2.1	Insect pheromone/odorant-binding proteins	1	-1
288	69026	a.39.4.1	Hypothetical protein MTH865	4	0
289	46690	a.4.1.1	Homeodomain	2	-2
290	100918	a.4.1.12	FIS-like	2	-1
291	100998	a.4.1.13	SLIDE domain	6	-10
292	46739	a.4.1.3	Myb/SANT domain	4	-4
293	46745	a.4.1.4	DNA-binding domain of telomeric protein	5	0
294	46748	a.4.1.5	Paired domain	1	0
295	46753	a.4.1.6	DNA-binding domain of rap1	1	0
296	46756	a.4.1.7	Centromere-binding	3	-4
297	46759	a.4.1.8	AraC type transcriptional activator	1	0
298	46764	a.4.1.9	Tetracyclin repressor-like, N-terminal domain	4	-1
299	46925	a.4.11.1	RNA polymerase subunit RPB10	9	-18
300	48296	a.4.12.1	Trp repressor, TrpR	1	0
301	81695	a.4.12.2	Chromosomal replication initiation factor DnaA C-terminal domain IV	7	-3
302	88665	a.4.13.2	Sigma4 domain	6	0
303	109706	a.4.13.3	YlxM/p13-like	2	-3
304	46768	a.4.2.1	Methylated DNA-protein cysteine methyltransferase, C-terminal domain	35	-11
305	46775	a.4.3.1	ARID domain	2	-2
306	46786	a.4.5.1	Biotin repressor-like	2	0
307	46816	a.4.5.10	Replication initiation protein	3	0
308	46819	a.4.5.11	Helicase DNA-binding domain	3	0
309	46827	a.4.5.13	Linker histone H1/H5	4	-2
310	46832	a.4.5.14	Forkhead DNA-binding domain	5	-2
311	46841	a.4.5.15	DNA-binding domain from rap30	7	-2
312	46844	a.4.5.16	C-terminal domain of RPA32	4	-1
313	46847	a.4.5.17	Cell cycle transcription factor e2f-dp	2	-5
314	46850	a.4.5.18	The central core domain of TFIIE beta	2	-9
315	46853	a.4.5.19	Z-DNA binding domain	2	0
316	46789	a.4.5.2	LexA repressor, N-terminal DNA-binding domain	1	0
317	46856	a.4.5.20	P4 origin-binding domain-like	2	-3
318	46859	a.4.5.21	ets domain	1	0
319	46873	a.4.5.22	Heat-shock transcription factor	4	-5
320	46877	a.4.5.23	Interferon regulatory factor	1	0
321	46882	a.4.5.24	Iron-dependent repressor protein	1	-1
322	46887	a.4.5.25	Methionine aminopeptidase, insert domain	10	-6
323	63379	a.4.5.28	MarR-like transcriptional regulators	8	-2
324	63475	a.4.5.29	Plant O-methyltransferase, N-terminal domain	1	-2
325	46792	a.4.5.3	Arginine repressor (ArgR), N-terminal DNA-binding domain	2	-2
326	63480	a.4.5.30	C-terminal domain of the rap74 subunit of TFIIF	6	-5
327	63483	a.4.5.31	DEP domain	1	-2
328	74676	a.4.5.33	Transcriptional regulator IclR, N-terminal domain	1	0
329	74679	a.4.5.34	SCF ubiquitin ligase complex WHB domain	10	-5
330	81690	a.4.5.36	DNA-binding protein Mj223	1	0
331	88979	a.4.5.37	LysR-like transcriptional regulators	2	0
332	46796	a.4.5.4	CAP C-terminal domain-like	3	0
333	101021	a.4.5.40	N-terminal domain of Bacillus PurR	1	-2
334	101027	a.4.5.42	FUR-like	1	0
335	101048	a.4.5.45	Dissimilatory sulfite reductase DsvD	1	0
336	101051	a.4.5.46	La domain	2	-8
337	109671	a.4.5.47	PCI domain (PINT motif)	6	-6
338	109683	a.4.5.51	Heat-inducible transcription repressor HrcA, N-terminal domain	1	-1
339	109686	a.4.5.52	DNA replication factor Cdt1	7	-3
340	109689	a.4.5.53	Eukaryotic translation initiation factor 3 subunit 12, eIF3k, C-terminal domain	3	-9
341	109692	a.4.5.54	Vacuolar sorting protein domain	4	-1
342	109699	a.4.5.55	Transcriptional regulator Rrf2	4	0
343	46804	a.4.5.6	GntR-like transcriptional regulators	2	-2
344	46807	a.4.5.7	Replication terminator protein (RTP)	2	0
345	46810	a.4.5.8	N-terminal domain of molybdate-dependent transcriptional regulator ModE	2	-2
346	46895	a.4.6.1	PhoB-like	8	0
347	46900	a.4.6.2	GerE-like (LuxR/UhpA family of transcriptional regulators)	2	0
348	46903	a.4.6.3	Spo0A	2	-2
349	46907	a.4.7.1	Ribosomal protein L11, C-terminal domain	19	-6
350	46916	a.4.9.1	Polynucleotide phosphorylase/guanosine pentaphosphate synthase (PNPase/GPSI), domain 3	4	0
351	47577	a.40.1.1	Calponin-homology domain, CH-domain	1	0
352	47588	a.41.1.1	Domain of poly(ADP-ribose) polymerase	5	-5
353	47593	a.42.1.1	SWIB/MDM2 domain	2	-1
354	100972	a.43.1.5	Met repressor, MetJ (MetR)	1	0
355	47617	a.45.1.1	Glutathione S-transferase (GST), C-terminal domain	20	-15
356	47645	a.46.1.1	Methionine synthase domain	15	-16
357	47649	a.46.2.1	Nucleoside phosphorylase/phosphoribosyltransferase N-terminal domain	12	-5
358	47656	a.47.1.1	STAT	2	0
359	47662	a.47.2.1	t-snare proteins	4	-5
360	109844	a.47.4.1	CAPPD, an extracellular domain of amyloid beta A4 protein	1	-4
361	47669	a.48.1.1	N-terminal domain of cbl (N-cbl)	1	-5
362	47673	a.48.2.1	Transferrin receptor-like dimerisation domain	1	-1
363	47677	a.48.3.1	Conserved domain common to transcription factors TFIIS, elongin A, CRSP70	1	0
364	109737	a.5.10.1	FGAM synthase PurL, linker domain	11	-2
365	46935	a.5.2.1	UBA domain	6	-3
366	68973	a.5.2.3	TAP-C domain-like	2	-3
367	88995	a.5.2.4	CUE domain	2	0
368	46939	a.5.3.1	CRAL/TRIO N-terminal domain	3	-4
369	46943	a.5.4.1	Elongation factor TFIIS domain 2	1	0
370	89001	a.5.7.1	DmpG/LeuA communication domain-like	1	0
371	109725	a.5.7.2	Conserved carboxylase domain	19	-6
372	109729	a.5.8.1	Hypothetical protein AF0491, middle domain	4	-3
373	109733	a.5.9.1	HBS1-like domain	2	-5
374	47687	a.50.1.1	Anaphylotoxins (complement system)	5	-1
375	47695	a.51.1.1	Cytochrome c oxidase subunit h	6	-11
376	47700	a.52.1.1	Plant lipid-transfer and hydrophobic proteins	1	-2
377	47708	a.52.1.2	Proteinase/alpha-amylase inhibitors	1	0
378	47730	a.55.1.1	Prokaryotic DNA-bending protein	15	-10
379	47742	a.56.1.1	CO dehydrogenase ISP C-domain like	17	-8
380	47758	a.58.1.1	Chemotaxis receptor methyltransferase CheR, N-terminal domain	1	0
381	47763	a.59.1.1	PAH2 domain	5	-4
382	46959	a.6.1.2	DNA repair factor XPA DNA- and RPA-binding domain, C-terminal subdomain	1	-8
383	46962	a.6.1.3	DNA-binding N-terminal domain of transcription activators	14	-2
384	74693	a.6.1.4	Dachshund-homology domain	1	-2
385	74696	a.6.1.5	Terminase gpNU1 subunit domain	2	0
386	47770	a.60.1.1	Pointed domain	1	-4
387	47773	a.60.1.2	SAM (sterile alpha motif) domain	4	0
388	47832	a.60.10.1	Enzyme I of the PEP:sugar phosphotransferase system HPr-binding (sub)domain	3	0
389	69048	a.60.11.1	Hypothetical protein YjbJ	7	0
390	81584	a.60.12.1	DNA polymerase beta-like, second domain	1	-2
391	81800	a.60.13.1	Putative methyltransferase TM0872, insert domain	17	-7
392	47782	a.60.2.1	DNA helicase RuvA subunit, middle domain	2	0
393	47786	a.60.2.2	NAD+-dependent DNA ligase, domain 3	7	-15
394	47790	a.60.3.1	C-terminal domain of RNA polymerase alpha subunit	5	-2
395	47795	a.60.4.1	DNA repair protein Rad51, N-terminal domain	2	-3
396	47799	a.60.5.1	Barrier-to-autointegration factor, BAF	1	-6
397	47803	a.60.6.1	DNA polymerase beta, N-terminal domain-like	4	-1
398	47808	a.60.7.1	5' to 3' exonuclease, C-terminal subdomain	9	-5
399	47820	a.60.8.1	HRDC domain from helicases	2	0
400	69044	a.60.8.2	RNA polymerase II subunit RBP4 (RpoF)	1	0
401	47824	a.60.9.1	lambda integrase-like, N-terminal domain	3	-1
402	47863	a.64.1.1	NKL-like	1	0
403	47866	a.64.1.2	Swaposin	1	-1
404	81806	a.64.1.3	Saposin B	4	-3
405	47875	a.65.1.1	Annexin	7	-4
406	47896	a.66.1.1	Transducin (alpha subunit), insertion domain	3	-2
407	47913	a.68.1.1	Wiscott-Aldrich syndrome protein, WASP, C-terminal domain	2	-6
408	47918	a.69.1.1	C-terminal domain of alpha and beta subunits of F1 ATP synthase	2	-3
409	47924	a.69.2.1	Ypt/Rab-GAP domain of gyp1p	1	-2
410	69056	a.69.3.1	1-deoxy-D-xylulose-5-phosphate reductoisomerase, C-terminal domain	6	0
411	46967	a.7.1.1	Spectrin repeat	2	0
412	109752	a.7.11.1	Alpha-hemoglobin stabilizing protein AHSP	2	-5
413	109756	a.7.12.1	PhoU-like	18	-14
414	46974	a.7.2.1	Enzyme IIa from lactose specific PTS, IIa-lac	2	0
415	46978	a.7.3.1	Succinate dehydrogenase/fumarate reductase flavoprotein C-terminal domain	24	-13
416	46985	a.7.4.1	Smac/diablo	1	-2
417	46989	a.7.5.1	Tubulin chaperone cofactor A	7	-8
418	46993	a.7.6.1	Ribosomal protein S20	1	0
419	63492	a.7.7.1	BAG domain	2	0
420	89010	a.7.8.1	GAT domain	3	-3
421	100929	a.7.8.2	Phosphoinositide-binding clathrin adaptor, domain 2	5	-3
422	47929	a.70.1.1	N-terminal domain of the delta subunit of the F1F0-ATP synthase	1	0
423	47934	a.71.1.1	ERP29 C domain-like	2	-6
424	81812	a.71.2.1	Helical domain of Sec23/24	1	-6
425	47939	a.72.1.1	Functional domain of the splicing factor Prp18	2	-2
426	47955	a.74.1.1	Cyclin	2	-4
427	47965	a.74.1.2	Transcription factor IIB (TFIIB), core domain	6	-3
428	47969	a.74.1.3	Retinoblastoma tumor suppressor domains	2	-4
429	47974	a.75.1.1	Ribosomal protein S7	4	-8
430	47980	a.76.1.1	Iron-dependent repressor protein, dimerization domain	3	-1
431	81312	a.77.1.2	DEATH domain, DD	2	-2
432	81313	a.77.1.3	Caspase recruitment domain, CARD	2	-3
433	81388	a.77.1.4	DEATH effector domain, DED	1	-6
434	101298	a.77.1.5	Pyrin domain, PYD	1	-3
435	48009	a.78.1.1	GntR ligand-binding domain-like	1	0
436	48014	a.79.1.1	Antitermination factor NusB	5	-4
437	109930	a.79.1.3	RmsB N-terminal domain-like	2	-3
438	88693	a.8.3.1	alpha-mannosidase, domain 2	7	-8
439	89013	a.8.3.2	4-alpha-glucanotransferase, domain 2	2	0
440	100935	a.8.4.1	Heat shock protein 70kD (HSP70), C-terminal subdomain	9	-4
441	48020	a.80.1.1	DNA polymerase III clamp loader subunits, C-terminal domain	10	-13
442	48025	a.81.1.1	N-terminal domain of DnaB helicase	18	-7
443	48035	a.83.1.1	Guanido kinase N-terminal domain	1	-1
444	48057	a.86.1.1	Hemocyanin middle domain	3	0
445	48061	a.86.1.2	Catechol oxidase	1	-1
446	48066	a.87.1.1	DBL homology domain (DH-domain)	1	-9
447	48077	a.88.1.1	LigA subunit of an aromatic-ring-opening dioxygenase LigAB	5	-3
448	48082	a.89.1.1	Methyl-coenzyme M reductase alpha and beta chain C-terminal domain	1	-1
449	48093	a.90.1.1	Transcription factor STAT-4 N-domain	1	-2
450	48098	a.91.1.1	Regulator of G-protein signaling, RGS	1	0
451	48109	a.92.1.1	Carbamoyl phosphate synthetase, large subunit connection domain	27	-22
452	48114	a.93.1.1	CCP-like	1	-5
453	48132	a.93.1.2	Myeloperoxidase-like	13	-5
454	74753	a.93.1.3	Catalase-peroxidase KatG	31	-26
455	48141	a.94.1.1	Ribosomal protein L19 (L19e)	11	-6
456	48151	a.96.1.1	Endonuclease III	15	-12
457	48154	a.96.1.2	Mismatch glycosylase	19	-18
458	48157	a.96.1.3	DNA repair glycosylase, 2 C-terminal domains	9	-20
459	74756	a.96.1.4	3-Methyladenine DNA glycosylase I (Tag)	22	-15
460	101349	a.96.1.5	3-Methyladenine DNA glycosylase III (MagIII)	1	0
461	48164	a.97.1.1	C-terminal domain of glutamyl-tRNA synthetase (GluRS)	2	0
462	74759	a.97.1.2	C-terminal domain of class I lysyl-tRNA synthetase	4	0
463	48169	a.98.1.1	R1 subunit of ribonucleotide reductase, N-terminal domain	15	-7
464	48174	a.99.1.1	Cryptochrome/photolyase FAD-binding domain	17	-37
465	48727	b.1.1.1	V set domains (antibody variable domain-like)	1	0
466	48942	b.1.1.2	C1 set domains (antibody constant domain-like)	1	0
467	49142	b.1.1.3	C2 set domains	1	-4
468	49159	b.1.1.4	I set domains	4	0
469	49349	b.1.10.1	Alpha-adaptin ear subdomain-like	1	-1
470	74857	b.1.10.2	gamma-adaptin C-terminal appendage domain-like	2	-2
471	101536	b.1.10.3	Coatomer appendage domain	1	-8
472	49355	b.1.11.1	Pilus chaperone	5	-1
473	49360	b.1.11.2	MSP-like	1	0
474	49364	b.1.12.1	Purple acid phosphatase, N-terminal domain	1	0
475	49368	b.1.13.1	Superoxide reductase-like	9	-6
476	69180	b.1.15.1	Integrin domains	2	-2
477	74854	b.1.16.1	Lamin A/C globular tail domain	4	0
478	74864	b.1.17.1	Thiol:disulfide interchange protein DsbD, N-terminal domain (DsbD-alpha)	7	-1
479	81279	b.1.18.1	NF-kappa-B/REL/DORSAL transcription factors, C-terminal domain	1	0
480	81291	b.1.18.11	Arrestin/Vps26-like	2	0
481	81294	b.1.18.14	Quinohemoprotein amine dehydrogenase A chain, domains 4 and 5	4	-1
482	81966	b.1.18.16	Cytoplasmic domain of inward rectifier potassium channel	6	-1
483	81969	b.1.18.17	Copper resistance protein C (CopC, PcoC)	4	-1
484	89191	b.1.18.18	Other IPT/TIG domains	3	-4
485	81282	b.1.18.2	E-set domains of sugar-utilizing enzymes	25	-3
486	81283	b.1.18.3	Arthropod hemocyanin, C-terminal domain	1	0
487	81286	b.1.18.6	Molybdenum-containing oxidoreductases-like dimerisation domain	6	-11
488	81287	b.1.18.7	ML domain	2	-6
489	81288	b.1.18.8	RhoGDI-like	4	-3
490	81289	b.1.18.9	Transglutaminase N-terminal domain	1	0
491	81983	b.1.19.1	Antigen MPT63/MPB63 (immunoprotective extracellular protein)	1	-1
492	49266	b.1.2.1	Fibronectin type III	7	-3
493	101543	b.1.21.1	Fungal immunomodulatory protein, FIP	2	0
494	101547	b.1.22.1	ASF1-like	1	-2
495	110070	b.1.23.1	ApaG-like	6	-13
496	49300	b.1.3.1	PKD domain	4	-4
497	49304	b.1.4.1	beta-Galactosidase/glucuronidase domain	3	-6
498	49310	b.1.5.1	Transglutaminase, two C-terminal domains	1	0
499	49314	b.1.6.1	Cadherin	1	0
500	110062	b.1.6.2	Dystroglycan, N-terminal domain	1	-4
501	49330	b.1.8.1	Cu,Zn superoxide dismutase-like	28	-14
502	49345	b.1.9.1	Cytochrome domain of cellobiose dehydrogenase	4	0
503	63677	b.1.9.2	Family 9 carbohydrate-binding module, CBD9	3	-1
504	101533	b.1.9.3	Glucodextranase, domain C	3	0
505	63818	b.100.1.1	Sortase	4	-3
506	63878	b.102.1.1	Methuselah ectodomain	1	0
507	63883	b.103.1.1	MoeA N-terminal region -like	19	-36
508	63888	b.104.1.1	P-domain of calnexin/calreticulin	1	-3
509	69190	b.105.1.1	PBP5 C-terminal domain-like	3	-2
510	69361	b.109.1.1	Cell wall binding repeat	2	0
511	49696	b.11.1.1	Crystallins/Ca-binding development proteins	2	0
512	74983	b.111.1.1	Small protein B (SmpB)	3	-3
513	81623	b.113.1.1	N-terminal domain of MutM-like DNA repair proteins	17	-5
514	82027	b.115.1.1	Calcium-mediated lectin	4	0
515	82052	b.117.1.1	Obg GTP-binding protein N-terminal domain	3	-19
516	82154	b.118.1.1	FAS1 domain	7	-6
517	82216	b.119.1.1	C-terminal autoproteolytic domain of nucleoporin nup98	8	-10
518	49724	b.12.1.1	Lipoxigenase N-terminal domain	4	-2
519	49730	b.12.1.2	Colipase-binding domain	1	0
520	49738	b.12.1.3	Alpha-toxin, C-terminal domain	2	0
521	49746	b.121.1.2	Peptidylglycine alpha-hydroxylating monooxygenase, PHM	1	-2
522	69204	b.121.3.1	Nucleoplasmin-like core domain	3	-3
523	88698	b.122.1.1	PUA domain	7	-13
524	89451	b.122.1.2	YggJ N-terminal domain-like	1	0
525	63801	b.122.1.3	ATP sulfurylase N-terminal domain	20	-11
526	110339	b.122.1.4	Hypothetical protein EF3133	12	0
527	89233	b.123.1.1	Hypothetical protein TM1070	1	0
528	89361	b.124.1.1	HesB-like domain	9	-2
529	89393	b.125.1.1	Outer-membrane lipoproteins carrier protein LolA	2	0
530	89396	b.125.1.2	Outer membrane lipoprotein receptor LolB	1	-1
531	89443	b.128.1.1	Hypothetical protein YojF	1	0
532	100921	b.130.1.1	Heat shock protein 70kD (HSP70), peptide-binding domain	3	-2
533	100940	b.131.1.1	Ku70 subunit middle domain	10	-10
534	100943	b.131.1.2	Ku80 subunit middle domain	6	-10
535	101856	b.131.1.3	SPOC domain	1	-7
536	101577	b.132.1.1	Supernatant protein factor (SPF), C-terminal domain	1	-2
537	101739	b.136.1.1	Stringent starvation protein B, SspB	2	-2
538	101745	b.137.1.1	RNase P subunit p29-like	2	0
539	101802	b.139.1.1	Surface presentation of antigens (SPOA)	13	-11
540	49759	b.14.1.1	Calpain large subunit, middle domain (domain III)	1	-1
541	101942	b.143.1.1	NAC domain	1	0
542	102032	b.145.1.1	AXH domain	2	-11
543	110112	b.146.1.1	Ctag/Cox11	18	-15
544	49765	b.15.1.1	HSP20	2	-1
545	49768	b.15.1.2	Co-chaperone p23-like	1	-1
546	101580	b.15.1.3	GS domain	1	-2
547	49773	b.16.1.1	Ecotin, trypsin inhibitor	11	-2
548	49778	b.17.1.1	Phosphatidylethanolamine binding protein	2	-3
549	63701	b.17.1.2	Prokaryotic PEBP-like proteins	19	-6
550	49786	b.18.1.1	Galactose-binding domain	2	-2
551	69213	b.18.1.10	Family 6 carbohydrate binding module, CBM6	4	0
552	69222	b.18.1.13	PepX C-terminal domain-like	22	-1
553	74893	b.18.1.14	CBM4/9	2	0
554	74896	b.18.1.15	Fucose binding lectin	2	-2
555	89241	b.18.1.18	Family 27 carbohydrate binding module, CBM27	1	0
556	49791	b.18.1.2	Discoidin domain (FA58C, coagulation factor 5/8 C-terminal domain)	4	0
557	89249	b.18.1.20	Proprotein convertase P-domain	3	-7
558	101585	b.18.1.21	F-box associated region, FBA	2	-2
559	101588	b.18.1.22	Allantoicase repeat	27	-10
560	110128	b.18.1.25	Rhamnogalacturonase B, RhgB, C-terminal domain	5	0
561	49800	b.18.1.4	Ephrin receptor ligand binding domain	1	-3
562	49803	b.18.1.5	beta-Galactosidase/glucuronidase, N-terminal domain	22	-20
563	49814	b.18.1.8	N-terminal domain of xrcc1	1	-5
564	69210	b.18.1.9	APC10-like	1	-7
565	110088	b.2.10.1	DR1885-like metal-binding protein	1	0
566	49385	b.2.2.1	Cellulose-binding domain family II	5	0
567	49390	b.2.2.2	Cellulose-binding domain family III	8	-1
568	49398	b.2.2.3	Bacterial chitobiase, n-terminal domain	2	-1
569	49411	b.2.4.1	Alpha-macroglobulin receptor domain	1	-1
570	81314	b.2.5.2	p53 DNA-binding domain-like	2	-2
571	81315	b.2.5.3	Rel/Dorsal transcription factors, DNA-binding domain	1	0
572	81316	b.2.5.4	T-box	1	0
573	81317	b.2.5.5	STAT DNA-binding domain	4	-3
574	81318	b.2.5.6	RUNT domain	1	0
575	81992	b.2.5.7	DNA-binding domain from NDT80	3	0
576	110080	b.2.5.8	DNA-binding protein LAG-1 (CSL)	1	-3
577	49442	b.2.6.1	Cytochrome f, large domain	3	-4
578	49448	b.2.7.1	Second domain of Mu2 adaptin subunit (ap50) of ap2 adaptor	1	0
579	81996	b.2.8.1	beta-sandwich domain of Sec23/24	2	0
580	110084	b.2.9.1	Peptidylarginine deiminase Pad4, middle domain	1	-1
581	49843	b.22.1.1	TNF-like	1	0
582	49855	b.23.1.1	Spermadhesin, CUB domain	1	-1
583	89261	b.23.2.1	Collagen-binding domain	3	0
584	49871	b.25.1.1	Osmotin, thaumatin-like protein	7	-3
585	49880	b.26.1.1	SMAD domain	1	0
586	49885	b.26.1.2	FHA domain	5	-2
587	101630	b.26.1.3	Interferon regulatory factor 3 (IRF3), transactivation domain	5	-3
588	49900	b.29.1.1	Legume lectins	1	0
589	49971	b.29.1.10	Glycosyl hydrolase family 7 catalytic core	6	0
590	49978	b.29.1.11	Xylanase/endoglucanase 11/12	15	-2
591	69236	b.29.1.12	Calnexin/calreticulin	3	-3
592	74904	b.29.1.13	Lectin leg-like	4	-4
593	101643	b.29.1.16	Thrombospondin C-terminal domain	1	-1
594	101646	b.29.1.17	Hypothetical protein YesU	3	-1
595	101649	b.29.1.18	Alginate lyase	6	0
596	101652	b.29.1.19	Glycosyl hydrolases family 32 C-terminal domain	1	0
597	49925	b.29.1.2	Glycosyl hydrolases family 16	14	-3
598	101656	b.29.1.20	Peptidase A4	4	-2
599	110143	b.29.1.21	Alpha-L-arabinofuranosidase B, N-terminal domain	5	-1
600	49932	b.29.1.3	Galectin (animal S-lectin)	3	0
601	49944	b.29.1.4	Laminin G-like module	2	-3
602	49951	b.29.1.5	Pentraxin (pentaxin)	4	-2
603	49453	b.3.1.1	Starch-binding domain	7	-1
604	110091	b.3.1.2	Rhamnogalacturonase B, RhgB, middle domain	2	0
605	49465	b.3.2.1	Carboxypeptidase regulatory domain	1	-3
606	49469	b.3.3.1	VHL	1	-5
607	49473	b.3.4.1	Transthyretin (synonym: prealbumin)	3	0
608	49483	b.3.6.1	Aromatic compound dioxygenase	19	-9
609	49999	b.30.2.1	Amine oxidase catalytic domain	12	-12
610	49995	b.30.5.1	beta-Galactosidase, domain 5	11	-3
611	110151	b.30.5.10	Rhamnogalacturonase B, RhgB, N-terminal domain	5	0
612	50006	b.30.5.2	Hyaluronate lyase-like, central domain	10	0
613	63733	b.30.5.3	Glycosyltransferase family 36 N-terminal domain	18	-12
614	74911	b.30.5.4	Aldose 1-epimerase (mutarotase)	29	-26
615	82042	b.30.5.5	Bacterial glucoamylase N-terminal domain-like	15	-3
616	88656	b.30.5.6	alpha-mannosidase, C-terminal domain	2	-4
617	89279	b.30.5.7	Hypothetical protein HI1317	12	-10
618	89286	b.30.5.8	4-alpha-glucanotransferase, C-terminal domain	2	0
619	110148	b.30.5.9	MdoG-like	20	-9
620	50023	b.33.1.1	Rieske iron-sulfur protein (ISP)	19	-7
621	50033	b.33.1.2	Ring hydroxylating alpha subunit ISP domain	11	-2
622	50041	b.34.1.2	FeoA-like	1	-2
623	74925	b.34.10.1	Cap-Gly domain	11	-9
624	82058	b.34.11.1	GW domain	1	0
625	82062	b.34.12.1	BAH domain	1	0
626	54161	b.34.13.1	Histone-like proteins from archaea	1	0
627	54165	b.34.13.2	Chromo domain	2	-4
628	101691	b.34.14.1	PAZ domain	5	0
629	101698	b.34.15.1	Hypothetical protein YfhH	1	0
630	50045	b.34.2.1	SH3-domain	5	-3
631	50085	b.34.3.1	Myosin S1 fragment, N-terminal domain	3	-1
632	50094	b.34.4.2	Photosystem I accessory protein E (PsaE)	2	-1
633	50098	b.34.4.3	Ferredoxin thioredoxin reductase (FTR), alpha (variable) chain	1	-2
634	50101	b.34.4.4	Nitrile hydratase beta chain	8	0
635	50105	b.34.5.1	Ribosomal proteins L24p and L21e	1	0
636	50110	b.34.5.2	eIF5a N-terminal domain-like	14	-1
637	50114	b.34.5.3	C-terminal domain of ribosomal protein L2	33	-16
638	82075	b.34.6.2	Kid/PemK	6	-3
639	63434	b.34.8.1	Fumarylacetoacetate hydrolase, FAH, N-terminal domain	14	-8
640	63749	b.34.9.1	Tudor domain	1	-5
641	69250	b.34.9.2	PWWP domain	2	-3
642	89299	b.34.9.3	MBT repeat	1	-2
643	50130	b.35.1.1	GroES	19	-12
644	50136	b.35.1.2	Alcohol dehydrogenase-like, N-terminal domain	12	-23
645	50157	b.36.1.1	PDZ domain	1	0
646	50172	b.36.1.2	Interleukin 16	5	-1
647	74933	b.36.1.4	HtrA-like serine proteases	5	-1
648	50183	b.38.1.1	Sm motif of small nuclear ribonucleoproteins, SNRNP	6	-6
649	74939	b.38.1.2	Pleiotropic translational regulator Hfq	3	-5
650	82090	b.38.1.3	Mechanosensitive channel protein MscS (YggB), middle domain	1	0
651	50194	b.39.1.1	Ribosomal protein L14	5	-4
652	49494	b.4.1.1	HSP40/DnaJ peptide-binding domain	2	-2
653	50200	b.40.1.1	Staphylococcal nuclease	3	0
654	101757	b.40.10.1	Hypothetical protein YgiW	2	0
655	50243	b.40.3.1	Tissue inhibitor of metalloproteinases, TIMP	1	0
656	63767	b.40.3.2	The laminin-binding domain of agrin	2	-7
657	89320	b.40.3.3	Netrin-like domain (NTR/C345C module)	2	-4
658	50250	b.40.4.1	Anticodon-binding domain	23	-6
659	89332	b.40.4.11	DNA replication initiator (cdc21/cdc54) N-terminal domain	11	-6
660	50259	b.40.4.2	DNA helicase RuvA subunit, N-terminal domain	4	0
661	50263	b.40.4.3	Single strand DNA-binding domain, SSB	9	-12
662	50277	b.40.4.4	Myf domain	26	-12
663	50282	b.40.4.5	Cold shock DNA-binding domain-like	1	-1
664	50307	b.40.4.6	DNA ligase/mRNA capping enzyme postcatalytic domain	7	-1
665	50321	b.40.4.8	RNA polymerase subunit RBP8	10	-7
666	69259	b.40.4.9	RecG "wedge" domain	1	0
667	50325	b.40.5.1	Inorganic pyrophosphatase	9	-14
668	50338	b.40.6.3	ABC-transporter additional domain	3	-1
669	50342	b.40.7.1	CheW-like	9	-7
670	82094	b.40.9.1	Heme chaperone CcmE	9	-9
671	50347	b.41.1.1	Photosynthetic reaction centre, H-chain, cytoplasmic domain	4	-3
672	110202	b.41.1.3	RIKEN cDNA 2310057j16 protein (KIAA1543)	1	-1
673	50354	b.42.1.1	Fibroblast growth factors (FGF)	5	0
674	50362	b.42.1.2	Interleukin-1 (IL-1)	1	0
675	50371	b.42.2.1	Ricin B-like	3	0
676	50379	b.42.2.2	Cysteine rich domain	2	-7
677	50387	b.42.4.1	Kunitz (STI) inhibitors	1	-1
678	50406	b.42.5.1	Fascin	5	-6
679	82110	b.42.6.1	MIR domain	3	-2
680	110218	b.42.7.1	DNA-binding protein LAG-1 (CSL)	1	-3
681	110222	b.42.8.1	AbfB domain	2	-2
682	50444	b.43.2.1	L-fucose isomerase, C-terminal domain	5	-1
683	50461	b.43.3.2	Ribosomal protein L3	2	-2
684	50438	b.43.4.1	NADPH-cytochrome p450 reductase FAD-binding domain-like	14	-15
685	63381	b.43.4.2	Ferredoxin reductase FAD-binding domain-like	15	-15
686	63783	b.43.4.3	Riboflavin synthase	12	-8
687	82115	b.43.5.1	ATP-dependent riboflavin kinase-like	10	-14
688	50466	b.44.1.1	EF-Tu/eEF-1alpha/eIF2-gamma C-terminal domain	1	-2
689	101791	b.44.2.1	Aminomethyltransferase beta-barrel domain	11	-2
690	50476	b.45.1.1	PNP-oxidase like	13	-19
691	50482	b.45.1.2	NADH:FMN oxidoreductase-like	33	-13
692	50487	b.46.1.1	Post formyltransferase domain	7	-6
693	50490	b.46.1.2	3-methyladenine DNA glycosylase (AAG, ANPG, MPG)	24	-31
694	50495	b.47.1.1	Prokaryotic proteases	11	-5
695	50514	b.47.1.2	Eukaryotic proteases	3	-3
696	50616	b.49.1.1	N-terminal domain of alpha and beta subunits of F1 ATP synthase	13	-9
697	88682	b.49.2.2	Alanine racemase	19	-5
698	88683	b.49.2.3	Eukaryotic ODC-like	17	-33
699	101822	b.49.3.1	Aminopeptidase/glucanase lid domain	8	-3
700	50631	b.50.1.1	Retroviral protease (retropepsin)	2	0
701	50646	b.50.1.2	Pepsin-like	1	0
702	50678	b.51.1.1	ValRS/IleRS/LeuRS editing domain	1	-5
703	50686	b.52.1.1	Eng V-like	4	-1
704	50689	b.52.1.2	Barwin	1	-1
705	82135	b.52.1.3	Pollen allergen PHL P 1 N-terminal domain	1	-1
706	50693	b.52.2.1	Pyruvoyl dependent aspartate decarboxylase, ADC	14	-23
707	50696	b.52.2.2	Formate dehydrogenase/DMSO reductase, C-terminal domain	26	-21
708	50708	b.52.2.3	Cdc48 N-terminal domain-like	4	-5
709	50716	b.53.1.1	Ribosomal protein L25-like	12	-5
710	50719	b.53.1.2	Gln-tRNA synthetase (GlnRS), C-terminal (anticodon-binding) domain	9	-28
711	50724	b.54.1.1	Core binding factor beta, CBF	2	-6
712	50730	b.55.1.1	Pleckstrin-homology domain (PH domain)	1	0
713	50755	b.55.1.2	Phosphotyrosine-binding domain (PTB)	2	0
714	50764	b.55.1.3	Ran-binding domain	1	-7
715	50767	b.55.1.4	Enabled/VASP homology 1 domain (EVH1 domain)	1	-1
716	50776	b.55.1.5	Third domain of FERM	1	-1
717	82146	b.55.1.6	PreBEACH PH-like domain	2	-8
718	101836	b.55.1.7	Dcp1	2	0
719	101839	b.55.1.8	GRAM domain	1	-5
720	110272	b.55.1.9	TFIIH domain	4	-4
721	50785	b.56.1.1	Transcription factor IIA (TFIIA), beta-barrel domain	3	-5
722	50801	b.58.1.1	Pyruvate kinase beta-barrel domain	10	-7
723	101844	b.58.1.2	MOSC (MOCO sulphurase C-terminal) domain	26	-11
724	50810	b.59.1.1	XRCC4, N-terminal domain	2	-5
725	49504	b.6.1.1	Plastocyanin/azurin-like	19	-2
726	49541	b.6.1.2	Periplasmic domain of cytochrome c oxidase subunit II	21	-12
727	49550	b.6.1.3	Multidomain cupredoxins	31	-11
728	63392	b.6.1.4	Nitrosocyanin	15	-1
729	74874	b.6.1.5	Ephrin ectodomain	3	0
730	110107	b.6.1.6	Peptidylarginine deiminase Pad4, N-terminal domain	3	-3
731	50815	b.60.1.1	Retinol binding protein-like	29	-4
732	50847	b.60.1.2	Fatty acid binding protein-like	1	-3
733	101863	b.60.1.4	Hypothetical protein YodA	9	0
734	101866	b.60.1.5	Hypothetical protein YwiB	1	0
735	50887	b.61.3.1	D-aminopeptidase, middle and C-terminal domains	3	0
736	69299	b.61.4.1	Quinohemoprotein amine dehydrogenase A chain, domain 3	2	-1
737	75002	b.61.5.1	Dipeptidyl peptidase I (cathepsin C), exclusion domain	1	-6
738	101875	b.61.6.1	YceI-like	20	-8
739	50892	b.62.1.1	Cyclophilin (peptidylprolyl isomerase)	9	-18
740	110278	b.62.1.2	Outer surface protein, C-terminal domain	3	0
741	50905	b.63.1.1	Oncogene products	1	-2
742	50912	b.64.1.1	Mannose 6-phosphate receptor domain	1	-1
743	50917	b.65.1.1	Rap30/74 interaction domains	1	-2
744	50924	b.66.1.1	Hemopexin-like domain	1	0
745	50935	b.67.1.1	Tachylectin-2	2	0
746	75006	b.67.2.1	alpha-L-arabinanase-like	16	-2
747	101881	b.67.2.2	Levansucrase	8	0
748	101884	b.67.2.3	Glycosyl hydrolases family 32 N-terminal domain	26	-19
749	110284	b.67.2.4	TM1225-like predicted glycosylases	16	-2
750	101888	b.67.3.1	Apyrase	1	-9
751	50940	b.68.1.1	Sialidases (neuraminidases)	14	-4
752	101905	b.68.10.1	GyrA/ParC C-terminal domain-like	3	-9
753	50953	b.68.2.1	Soluble quinoprotein glucose dehydrogenase	16	-30
754	50957	b.68.3.1	Thermostable phytase (3-phytase)	17	-5
755	50961	b.68.4.1	TolB, C-terminal domain	10	0
756	63826	b.68.5.1	YWTD domain	1	0
757	63830	b.68.6.1	SGL-like	2	-1
758	101895	b.68.6.2	Serum paraoxonase/arylesterase 1, PON1	4	-1
759	69305	b.68.7.1	Tricorn protease N-terminal domain	4	-1
760	89373	b.68.8.1	Fucose-specific lectin	2	0
761	101899	b.68.9.1	NHL repeat	13	-2
762	50966	b.69.1.1	Galactose oxidase, central domain	6	-2
763	75012	b.69.10.1	3-carboxy-cis,cis-mucoante lactonizing enzyme	2	-1
764	101909	b.69.11.1	Putative isomerase YbhE	13	-4
765	101913	b.69.12.1	Sema domain	1	-1
766	110297	b.69.13.1	Oligoxyloglucan reducing end-specific cellobiohydrolase	11	-2
767	50970	b.69.2.1	Methylamine dehydrogenase, H-chain	4	0
768	69309	b.69.2.2	Quinohemoprotein amine dehydrogenase B chain	3	-1
769	82166	b.69.2.3	YVTN repeat	13	-1
770	50975	b.69.3.1	Nitrous oxide reductase, N-terminal domain	32	-2
771	50979	b.69.4.1	WD40-repeat	11	-2
772	110289	b.69.4.2	Cell cycle arrest protein BUB3	5	-1
773	50986	b.69.5.1	Regulator of chromosome condensation RCC1	5	-7
774	69315	b.69.5.2	beta-lactamase inhibitor protein-II, BLIP-II	2	0
775	50990	b.69.6.1	Clathrin heavy-chain terminal domain	1	-1
776	50994	b.69.7.1	Prolyl oligopeptidase, N-terminal domain	19	-8
777	69319	b.69.8.1	Integrin alpha N-terminal domain	1	0
778	69323	b.69.9.1	Tricorn protease domain 2	3	-1
779	49563	b.7.1.1	PLC-like (P variant)	4	0
780	49575	b.7.1.2	Synaptotagmin-like (S variant)	1	0
781	49591	b.7.3.1	PHL pollen allergen	1	-1
782	49595	b.7.4.1	Rab geranylgeranyltransferase alpha-subunit, insert domain	1	-6
783	50999	b.70.1.1	Quinoprotein alcohol dehydrogenase-like	23	-10
784	51005	b.70.2.1	C-terminal (heme d1) domain of cytochrome cd1-nitrite reductase	17	-2
785	82172	b.70.3.1	DPP6 N-terminal domain-like	9	-2
786	51012	b.71.1.1	alpha-Amylases, C-terminal beta-sheet domain	32	-7
787	89388	b.71.1.2	Composite domain of glycosyl hydrolase families 5, 30, 39 and 51	6	-7
788	101928	b.71.1.3	Putative alpha-L-fucosidase C-terminal domain	1	0
789	51046	b.72.1.1	WW domain	3	-2
790	51065	b.73.1.1	Head domain of nucleotide exchange factor GrpE	1	0
791	51070	b.74.1.1	Carbonic anhydrase	31	-7
792	51082	b.75.1.1	Bacteriochlorophyll A protein	1	0
793	82186	b.76.2.1	Histone H3 K4-specific methyltransferase SET7/9 N-terminal domain	3	0
794	51093	b.77.1.1	Vitelline membrane outer protein-I (VMO-I)	4	-4
795	51102	b.77.3.1	Mannose-binding lectins	1	-1
796	49600	b.8.1.1	MATH domain	1	-1
797	69198	b.8.1.2	SIAH, seven in absentia homolog	2	-5
798	51127	b.80.1.1	Pectate lyase-like	11	-3
799	101957	b.80.1.11	Filamentous hemagglutinin FhaB, secretion domain	9	-3
800	51133	b.80.1.2	Pectin lyase	2	-2
801	51137	b.80.1.3	Galacturonase	9	-3
802	51144	b.80.1.4	Chondroitinase B	2	0
803	51147	b.80.1.5	Pectin methylesterase	16	-3
804	51153	b.80.1.7	Virulence factor P.69 pertactin	3	0
805	101951	b.80.1.9	Pectate transeliminase	10	-4
806	63849	b.80.3.1	Cell-division inhibitor MinC, C-terminal domain	1	-1
807	69337	b.80.4.1	Alpha subunit of glutamate synthase, C-terminal domain	17	-12
808	69341	b.80.5.1	C-terminal domain of adenylylcyclase associated protein	1	-7
809	101961	b.80.6.1	Stabilizer of iron transporter SufD	13	-17
810	51121	b.80.7.1	Serralysin-like metalloprotease, C-terminal domain	4	-1
811	51162	b.81.1.1	UDP N-acetylglucosamine acyltransferase	7	-8
812	51165	b.81.1.2	Tetrahydrodipicolinate-N-succinlytransferase, THDP-succinlytransferase, DapD	8	-4
813	51168	b.81.1.3	Galactoside acetyltransferase-like	40	-20
814	51171	b.81.1.4	GlmU C-terminal domain-like	8	-5
815	51174	b.81.1.5	gamma-carbonic anhydrase-like	39	-18
816	110309	b.81.1.6	Serine acetyltransferase	32	-16
817	101968	b.81.3.1	Adhesin YadA, collagen-binding domain	2	-1
818	51183	b.82.1.1	dTDP-sugar isomerase	30	-28
819	101976	b.82.1.10	TM1459-like	1	0
820	101979	b.82.1.11	YlbA-like	19	-2
821	101984	b.82.1.12	Pirin-like	31	-30
822	110318	b.82.1.13	KduI-like	14	-3
823	51187	b.82.1.2	Germin/Seed storage 7S protein	14	-2
824	51191	b.82.1.3	Type I phosphomannose isomerase	11	-12
825	51194	b.82.1.4	Homogentisate dioxygenase	18	-17
826	75035	b.82.1.5	Quercetin 2,3-dioxygenase-like	4	0
827	82191	b.82.1.6	Acireductone dioxygenase	13	-1
828	89403	b.82.1.7	Glucose-6-phosphate isomerase, GPI	3	0
829	89406	b.82.1.8	Hypothetical protein TM1112	2	0
830	89409	b.82.1.9	TM1287-like	1	-1
831	51198	b.82.2.1	Penicillin synthase-like	16	-2
832	51203	b.82.2.2	Clavaminate synthase	3	0
833	63855	b.82.2.3	Gab protein (hypothetical protein YgaT)	8	0
834	75038	b.82.2.5	TauD/TfdA-like	20	-13
835	82194	b.82.2.6	Hypoxia-inducible factor HIF ihhibitor (FIH1)	6	-7
836	51210	b.82.3.2	cAMP-binding domain	12	-9
837	51216	b.82.4.1	Regulatory protein AraC	3	0
838	51220	b.82.5.1	Trp RNA-binding attenuation protein (TRAP)	3	-3
839	101995	b.82.5.2	PA3696/SPS0176-like	21	-3
840	63863	b.82.6.1	Thiamin pyrophosphokinase, substrate-binding domain	6	-6
841	81652	b.82.7.1	Calcium ATPase, transduction domain A	4	-5
842	51231	b.84.1.1	Biotinyl/lipoyl-carrier proteins and domains	11	-16
843	51247	b.84.2.1	BC C-terminal domain-like	19	-24
844	51256	b.84.2.2	Cytochrome f, small domain	3	-1
845	51262	b.84.3.1	Glucose permease-like	17	-3
846	51270	b.85.1.1	AFP III-like domain	1	-1
847	51279	b.85.3.1	Urease, beta-subunit	34	-20
848	51284	b.85.4.1	dUTPase-like	6	-41
849	63868	b.85.6.1	MoeA C-terminal domain-like	3	-9
850	82200	b.85.7.1	Histone lysine methyltransferases	8	-4
851	82210	b.85.7.3	RuBisCo LSMT catalytic domain	6	-3
852	51295	b.86.1.1	Hedgehog C-terminal (Hog) autoprocessing domain	1	0
853	51298	b.86.1.2	Intein (protein splicing domain)	8	-2
854	51307	b.87.1.1	LexA-related	6	-2
855	51312	b.87.1.2	Type 1 signal peptidase	9	-5
856	51317	b.88.1.1	RabGEF Mss4	3	-7
857	63873	b.88.1.2	Translationally controlled tumor protein TCTP (histamine-releasing factor)	11	-8
858	75041	b.88.1.3	SelR domain	23	-34
859	49607	b.9.1.1	Neurophysin II	2	-5
860	51339	b.92.1.1	alpha-Subunit of urease	31	-22
861	75044	b.92.1.3	Hydantoinase (dihydropyrimidinase)	1	-5
862	82224	b.92.1.4	SAH/MTA deaminase-like	1	0
863	51345	b.93.1.1	Epsilon subunit of F1F0-ATP synthase N-terminal domain	10	-12
864	63698	b.94.1.1	Olfactory marker protein	2	-1
865	63708	b.95.1.1	Ganglioside M2 (gm2) activator	2	-4
866	63713	b.96.1.1	Nicotinic receptor ligand binding domain-like	4	0
867	63725	b.97.1.1	Anemone pore-forming cytolysin	1	0
868	63738	b.98.1.1	Leukotriene A4 hydrolase N-terminal domain	6	-13
869	51352	c.1.1.1	Triosephosphate isomerase (TIM)	2	-7
870	51570	c.1.10.1	Class I aldolase	1	-2
871	51591	c.1.10.2	Class II FBP aldolase	8	-22
872	51594	c.1.10.3	5-aminolaevulinate dehydratase, ALAD (porphobilinogen synthase)	3	-9
873	51599	c.1.10.4	Class I DAHP synthetase	13	-11
874	89494	c.1.10.5	HMGL-like	12	-31
875	110368	c.1.10.6	NeuB-like	45	-22
876	51605	c.1.11.1	Enolase	1	-5
877	51609	c.1.11.2	D-glucarate dehydratase-like	31	-25
878	51622	c.1.12.1	Pyruvate kinase	4	-15
879	51629	c.1.12.2	Pyruvate phosphate dikinase, C-terminal domain	28	-13
880	51632	c.1.12.3	Phosphoenolpyruvate carboxylase	12	-18
881	51638	c.1.12.5	HpcH/HpaI aldolase	35	-10
882	88704	c.1.12.7	Phosphoenolpyruvate mutase/Isocitrate lyase-like	13	-20
883	89503	c.1.12.8	Ketopantoate hydroxymethyltransferase PanB	3	-17
884	51646	c.1.13.1	Malate synthase G	10	-16
885	51650	c.1.14.1	RuBisCo, large subunit, C-terminal domain	18	-10
886	51659	c.1.15.1	Endonuclease IV	26	-14
887	51662	c.1.15.2	L-rhamnose isomerase	12	-1
888	51665	c.1.15.3	Xylose isomerase	28	-16
889	75090	c.1.15.4	IolI-like	3	0
890	75093	c.1.15.5	Hypothetical protein YgbM (EC1530)	20	-17
891	110377	c.1.15.6	UxuA-like	25	-5
892	51680	c.1.16.1	Bacterial luciferase (alkanal monooxygenase)	3	0
893	51687	c.1.16.3	F420 dependent oxidoreductases	10	0
894	82275	c.1.16.4	Ssud-like monoxygenases	22	-18
895	51691	c.1.17.1	NadC C-terminal domain-like	11	-34
896	51696	c.1.18.1	Mammalian PLC	3	-4
897	51699	c.1.18.2	Bacterial PLC	8	0
898	89508	c.1.18.3	Glycerophosphoryl diester phosphodiesterase	30	-8
899	51704	c.1.19.1	Methylmalonyl-CoA mutase, N-terminal (CoA-binding) domain	23	-17
900	51707	c.1.19.2	Glutamate mutase, large subunit	8	-1
901	51710	c.1.19.3	Diol dehydratase, alpha subunit	7	-1
902	51367	c.1.2.1	Histidine biosynthesis enzymes	5	-12
903	51372	c.1.2.2	D-ribulose-5-phosphate 3-epimerase	2	-7
904	51375	c.1.2.3	Decarboxylase	12	-22
905	51381	c.1.2.4	Tryptophan biosynthesis enzymes	6	-9
906	51714	c.1.20.1	tRNA-guanine transglycosylase	5	-15
907	51718	c.1.21.1	Dihydropteroate synthetase	10	-11
908	51723	c.1.21.2	Methyltetrahydrofolate-utiluzing methyltransferases	6	-3
909	51727	c.1.22.1	Uroporphyrinogen decarboxylase, UROD	6	-7
910	110384	c.1.22.2	Cobalamin-independent methionine synthase	35	-27
911	51731	c.1.23.1	Methylenetetrahydrofolate reductase	20	-23
912	82279	c.1.23.2	Proline dehydrohenase domain of bifunctional PutA protein	5	-16
913	63893	c.1.24.1	Pyridoxine 5'-phosphate synthase	2	-3
914	75099	c.1.25.1	Monomethylamine methyltransferase MtmB	2	0
915	82283	c.1.26.1	Homocysteine S-methyltransferase	10	-14
916	102111	c.1.27.1	(2r)-phospho-3-sulfolactate synthase ComA	8	-5
917	102115	c.1.28.1	Biotin synthase	15	-17
918	102118	c.1.28.2	Oxygen-independent coproporphyrinogen III oxidase HemN	17	-22
919	110388	c.1.28.3	MoCo biosynthesis proteins	22	-30
920	110392	c.1.29.1	GlpP-like	5	0
921	51392	c.1.3.1	Thiamin phosphate synthase	22	-32
922	110396	c.1.30.1	CutC-like	26	-12
923	110400	c.1.31.1	ThiG-like	10	-18
924	51413	c.1.5.1	Inosine monophosphate dehydrogenase (IMPDH)	1	-11
925	51420	c.1.6.1	Alanine racemase-like, N-terminal domain	3	-10
926	51427	c.1.6.2	Hypothetical protein ybl036c	9	-20
927	51431	c.1.7.1	Aldo-keto reductases (NADP)	8	-11
928	51446	c.1.8.1	Amylase, catalytic domain	8	-31
929	82253	c.1.8.10	alpha-D-glucuronidase/Hyaluronidase catalytic domain	15	-1
930	102079	c.1.8.11	Putative alpha-L-fucosidase, catalytic domain	17	-6
931	110354	c.1.8.12	Outer surface protein, N-terminal domain	6	-5
932	51487	c.1.8.3	beta-glycanases	27	-19
933	51521	c.1.8.4	Family 1 of glycosyl hydrolase	34	-19
934	51534	c.1.8.5	Type II chitinase	26	-14
935	51550	c.1.8.6	beta-N-acetylhexosaminidase catalytic domain	20	-11
936	51553	c.1.8.7	NagZ-like	37	-21
937	63912	c.1.8.8	1,4-beta-N-acetylmuraminidase	14	-6
938	69387	c.1.8.9	Bee venom hyaluronidase	1	-5
939	51557	c.1.9.1	Adenosine/AMP deaminase	31	-24
940	82261	c.1.9.10	N-acetylglucosamine-6-phosphate deacetylase, NagA, catalytic domain	32	-26
941	82264	c.1.9.11	D-aminoacylase, catalytic domain	24	-8
942	82267	c.1.9.12	TatD Mg-dependent DNase-like	20	-15
943	89489	c.1.9.13	Isoaspartyl dipeptidase, catalytic domain	16	-5
944	51560	c.1.9.2	alpha-subunit of urease, catalytic domain	34	-19
945	51564	c.1.9.3	Phosphotriesterase-like	18	-5
946	63917	c.1.9.4	Dihydroorotase	9	-7
947	69390	c.1.9.5	Cytosine deaminase catalytic domain	25	-9
948	75073	c.1.9.6	Hydantoinase (dihydropyrimidinase), catalytic domain	51	-23
949	75079	c.1.9.7	Renal dipeptidase	28	-21
950	75082	c.1.9.8	Uronate isomerase-like	19	-10
951	82258	c.1.9.9	SAH/MTA deaminase-like	27	-15
952	52048	c.10.1.1	28-residue LRR	5	-1
953	52052	c.10.1.2	Rna1p (RanGAP1), N-terminal domain	3	-10
954	52055	c.10.1.3	Cyclin A/CDK2-associated p19, Skp2	7	-4
955	52059	c.10.2.1	Internalin LRR domain	9	-1
956	52062	c.10.2.2	Rab geranylgeranyltransferase alpha-subunit, C-terminal domain	1	-5
957	52065	c.10.2.3	mRNA export factor tap	4	-7
958	52068	c.10.2.4	U2A'-like	2	-16
959	52071	c.10.2.5	L domain	2	0
960	75142	c.10.2.7	Ngr ectodomain-like	1	-4
961	89569	c.10.2.8	Polygalacturonase inhibiting protein PGIP	1	-1
962	52076	c.10.3.1	Outer arm dynein light chain 1	1	-13
963	64000	c.100.1.1	Thiamin pyrophosphokinase, catalytic domain	8	-13
964	64006	c.101.1.1	Undecaprenyl diphosphate synthase	1	-7
965	64044	c.102.1.1	Cell-division inhibitor MinC, N-terminal domain	1	-1
966	64077	c.103.1.1	MTH938-like	2	0
967	64154	c.104.1.1	YjeF N-terminal domain-like	3	-10
968	64159	c.105.1.1	2,3-Bisphosphoglycerate-independent phosphoglycerate mutase, substrate-binding domain	15	-20
969	64168	c.106.1.1	SurE-like	16	-16
970	64183	c.107.1.1	Manganese-dependent inorganic pyrophosphatase (family II)	14	-13
971	75323	c.107.1.2	Exonuclease RecJ	2	-2
972	56785	c.108.1.1	HAD-related	12	-6
973	82388	c.108.1.10	Predicted hydrolases Cof	5	-4
974	102304	c.108.1.11	Homoserine kinase ThrH	12	-1
975	102307	c.108.1.12	Class B acid phosphatase, AphA	2	-1
976	102317	c.108.1.14	NagD-like	29	-25
977	110506	c.108.1.15	Trehalose-phosphatase	1	0
978	110509	c.108.1.16	NLI interacting factor-like phosphatase	1	0
979	56789	c.108.1.2	YihX-like	4	-3
980	56792	c.108.1.3	Phosphonoacetaldehyde hydrolase-like	16	-2
981	64511	c.108.1.4	Phosphoserine phosphatase	24	-34
982	69467	c.108.1.5	Probable phosphatase YrbI	14	-5
983	75173	c.108.1.6	beta-Phosphoglucomutase-like	13	-6
984	81656	c.108.1.7	Meta-cation ATPase, catalytic domain P	36	-15
985	82382	c.108.1.8	5'(3')-deoxyribonucleotidase (dNT-2)	4	-5
986	68924	c.109.1.1	PEP carboxykinase N-terminal domain	8	-25
987	69501	c.110.1.1	DTD-like	19	-28
988	69573	c.111.1.1	Molybdenum cofactor biosynthesis protein MoeB	18	-25
989	89763	c.111.1.2	Ubiquitin activating enzymes (UBA)	1	-1
990	69594	c.112.1.1	Glycerol-3-phosphate (1)-acyltransferase	1	-2
991	69619	c.113.1.1	HemD-like	6	-8
992	75170	c.114.1.1	DsrEF-like	4	0
993	75182	c.115.1.1	Hypothetical protein MTH777 (MT0777)	2	-4
994	75218	c.116.1.1	SpoU-like RNA 2'-O ribose methyltransferase	8	-9
995	75221	c.116.1.2	Hypothetical protein MTH1 (MT0001), dimerisation domain	3	0
996	82371	c.116.1.3	YbeA-like	14	-1
997	89629	c.116.1.4	tRNA(m1G37)-methyltransferase TrmD	1	0
998	89632	c.116.1.5	YggJ C-terminal domain-like	9	-12
999	75305	c.117.1.1	Amidase signature (AS) enzymes	2	-12
1000	82545	c.118.1.1	GckA/TtuD-like	25	-20
1001	82550	c.119.1.1	DegV-like	7	-6
1002	109613	c.119.1.2	DAK1	30	-25
1003	52081	c.12.1.1	Ribosomal proteins L15p and L18e	4	-3
1004	89619	c.120.1.1	PIN domain	3	-1
1005	53045	c.120.1.2	5' to 3' exonuclease catalytic domain	5	-25
1006	89624	c.121.1.1	Ribose/Galactose isomerase RpiB/AlsB	23	-13
1007	89734	c.122.1.1	L-sulfolactate dehydrogenase-like	40	-12
1008	89797	c.123.1.1	CoA-transferase family III (CaiB/BaiF)	24	-25
1009	52513	c.124.1.1	NagB-like	25	-20
1010	74656	c.124.1.2	CoA transferase alpha subunit-like	21	-25
1011	74657	c.124.1.3	CoA transferase beta subunit-like	18	-23
1012	75176	c.124.1.4	D-ribose-5-phosphate isomerase (RpiA), catalytic domain	25	-7
1013	110513	c.124.1.5	IF2B-like	17	-30
1014	110520	c.124.1.6	Methenyltetrahydrofolate synthetase	15	-12
1015	102216	c.125.1.1	Creatininase	7	0
1016	102221	c.126.1.1	DNA polymerase III psi subunit	1	0
1017	102325	c.127.1.1	F420-dependent methylenetetrahydromethanopterin dehydrogenase (MTD)	1	0
1018	102401	c.128.1.1	DNA polymerase III chi subunit	1	-2
1019	102406	c.129.1.1	MoCo carrier protein-like	27	-21
1020	52088	c.13.1.1	CRAL/TRIO domain	2	-4
1021	52092	c.13.2.1	Anti-sigma factor antagonist SpoIIaa	6	-1
1022	102463	c.131.1.1	Peptidyl-tRNA hydrolase II	3	-15
1023	102523	c.132.1.1	Bacterial fluorinating enzyme, N-terminal domain	3	-1
1024	102547	c.133.1.1	RbsD-like	12	-8
1025	102589	c.134.1.1	LmbE-like	9	-3
1026	102706	c.135.1.1	NIF3 (NGG1p interacting factor 3)-like	8	-4
1027	110461	c.137.1.1 changed to c.23.14.2	Hypothetical protein PA1492	1	0
1028	110582	c.138.1.1	Indigoidine synthase A-like	17	-12
1029	110651	c.139.1.1 changed to c.97.1.3	Hypothetical protein TM1506	1	0
1030	52097	c.14.1.1	Clp protease, ClpP subunit	4	-16
1031	52100	c.14.1.2	Tail specific protease, catalytic domain	14	-16
1032	52103	c.14.1.3	Crotonase-like	12	-13
1033	89572	c.14.1.4	Biotin dependent carboxylase carboxyltransferase domain	14	-15
1034	110711	c.140.1.1	Hypothetical protein TT1679	7	-3
1035	110739	c.141.1.1	Glycerate kinase I	23	-10
1036	52114	c.15.1.1	DNA-repair protein XRCC1	4	-7
1037	52117	c.15.1.2	DNA ligase	5	0
1038	63955	c.15.1.3	BRCT domain	2	-4
1039	75148	c.15.1.4	53BP1	1	-4
1040	52122	c.16.1.1	Lumazine synthase	15	-16
1041	52130	c.17.1.1	Caspase catalytic domain	1	0
1042	52142	c.18.1.1	Uracil-DNA glycosylase	23	-13
1043	52147	c.18.1.2	Mug-like	11	-22
1044	89579	c.18.1.3	Single-strand selective monofunctional uracil-DNA glycosylase SMUG1	4	-6
1045	52152	c.19.1.1	FabD-like	10	-16
1046	53645	c.19.1.2	Lysophospholipase	5	-3
1047	89729	c.19.1.3	Patatin	8	-3
1048	51736	c.2.1.1	Alcohol dehydrogenase-like, C-terminal domain	11	-15
1049	75110	c.2.1.11	Siroheme synthase N-terminal domain-like	2	-2
1050	102174	c.2.1.12	Transcriptional repressor Rex, C-terminal domain	1	0
1051	110436	c.2.1.13	Ornithine cyclodeaminase-like	45	-14
1052	51830	c.2.1.4	Formate/glycerate dehydrogenases, NAD-domain	1	-5
1053	51848	c.2.1.5	LDH N-terminal domain-like	10	-16
1054	51868	c.2.1.6	6-phosphogluconate dehydrogenase-like, N-terminal domain	3	-7
1055	51883	c.2.1.7	Aminoacid dehydrogenase-like, C-terminal domain	1	-1
1056	51900	c.2.1.8	CoA-binding domain	8	-18
1057	63944	c.2.1.9	Potassium channel NAD-binding domain	13	-8
1058	52157	c.20.1.1	Initiation factor IF2/eIF5b, domain 3	8	-6
1059	52162	c.21.1.1	Ribosomal protein L13	7	-6
1060	52167	c.22.1.1	Ribosomal protein L4	1	-3
1061	52173	c.23.1.1	CheY-related	13	-12
1062	52194	c.23.1.2	Receiver domain of the ethylene receptor	1	-2
1063	52273	c.23.10.3	Acetylhydrolase	3	-5
1064	52276	c.23.10.4	Rhamnogalacturonan acetylesterase	5	0
1065	89594	c.23.10.5	TAP-like	6	-3
1066	102240	c.23.10.6	Hypothetical protein alr1529	5	0
1067	52280	c.23.11.1	Beta-D-glucan exohydrolase, C-terminal domain	19	-5
1068	52284	c.23.12.1	Formate/glycerate dehydrogenases, substrate-binding domain	22	-13
1069	52297	c.23.12.2	L-alanine dehydrogenase-like	22	-28
1070	52300	c.23.12.3	S-adenosylhomocystein hydrolase	2	-13
1071	52305	c.23.13.1	Type II 3-dehydroquinate dehydratase	10	-20
1072	52310	c.23.14.1	N-deoxyribosyltransferase	2	0
1073	52314	c.23.15.1	Ribosomal protein S2	1	-11
1074	52318	c.23.16.1	Class I glutamine amidotransferases (GAT)	1	-1
1075	52325	c.23.16.2	DJ-1/PfpI	33	-40
1076	52331	c.23.16.4	Aspartyl dipeptidase PepE	13	-7
1077	82351	c.23.16.5	A4 beta-galactosidase middle domain	7	-1
1078	110486	c.23.16.6	ThuA-like	10	-3
1079	63966	c.23.17.1	Precorrin-8X methylmutase CbiC/CobH	30	-14
1080	52201	c.23.2.1	Toll/Interleukin receptor TIR domain	1	-2
1081	52211	c.23.4.1	Succinyl-CoA synthetase domains	8	-9
1082	52219	c.23.5.1	Flavodoxin-related	24	-10
1083	52231	c.23.5.2	Cytochrome p450 reductase N-terminal domain-like	7	-4
1084	52235	c.23.5.3	Quinone reductase	21	-15
1085	89590	c.23.5.4	NADPH-dependent FMN reductase	31	-5
1086	102237	c.23.5.6	Hypothetical protein YwqN	2	-3
1087	110477	c.23.5.7	Flavoprotein NrdI	3	0
1088	52243	c.23.6.1	Cobalamin (vitamin B12)-binding domain	16	-21
1089	52256	c.23.8.1	N5-CAIR mutase (phosphoribosylaminoimidazole carboxylase, PurE)	4	-6
1090	52336	c.24.1.1	Carbamoyl phosphate synthetase, large subunit allosteric, C-terminal domain	2	0
1091	52339	c.24.1.2	Methylglyoxal synthase, MgsA	26	-15
1092	63971	c.24.1.3	Inosicase	2	-8
1093	52344	c.25.1.1	Reductases	10	-16
1094	52359	c.25.1.2	Aromatic dioxygenase reductase-like	6	-2
1095	52362	c.25.1.3	Dihydroorotate dehydrogenase B, PyrK subunit	4	-1
1096	52365	c.25.1.4	NADPH-cytochrome p450 reductase-like	18	-6
1097	52370	c.25.1.5	Flavohemoglobin, C-terminal domain	8	-2
1098	52394	c.26.1.2	Cytidylyltransferase	12	-4
1099	52397	c.26.1.3	Adenylyltransferase	1	-11
1100	63976	c.26.1.4	Pantothenate synthetase (Pantoate-beta-alanine ligase, PanC)	3	-11
1101	63979	c.26.1.5	ATP sulfurylase catalytic domain	26	-13
1102	52403	c.26.2.1	N-type ATP pyrophosphatases	1	-1
1103	52410	c.26.2.2	PAPS reductase-like	9	-1
1104	52432	c.26.2.3	ETFP subunits	15	-24
1105	52436	c.26.2.4	Universal stress protein-like	6	-2
1106	82359	c.26.2.5	PP-loop ATPase	6	-1
1107	52414	c.26.3.1	UDP-glucose/GDP-mannose dehydrogenase C-terminal domain	15	-1
1108	52419	c.27.1.1	Nucleoside phosphorylase/phosphoribosyltransferase catalytic domain	10	-12
1109	52426	c.28.1.1	Cryptochrome/photolyase, N-terminal domain	31	-15
1110	51906	c.3.1.1	C-terminal domain of adrenodoxin reductase-like	30	-17
1111	51913	c.3.1.2	FAD-linked reductases, N-terminal domain	33	-19
1112	51931	c.3.1.3	GDI-like N domain	1	0
1113	51934	c.3.1.4	Succinate dehydrogenase/fumarate reductase flavoprotein N-terminal domain	5	-24
1114	51943	c.3.1.5	FAD/NAD-linked reductases, N-terminal and central domains	10	-17
1115	52441	c.30.1.1	BC N-terminal domain-like	1	-2
1116	52452	c.30.1.2	D-Alanine ligase N-terminal domain	11	-9
1117	52457	c.30.1.3	Prokaryotic glutathione synthetase, N-terminal domain	9	-4
1118	52460	c.30.1.4	Eukaryotic glutathione synthetase, substrate-binding domain	6	-7
1119	52463	c.30.1.5	Synapsin domain	3	-3
1120	52468	c.31.1.1	Deoxyhypusine synthase, DHS	7	-7
1121	52471	c.31.1.2	C-terminal domain of the electron transfer flavoprotein alpha subunit	9	-27
1122	52475	c.31.1.3	Pyruvate oxidase and decarboxylase, middle domain	34	-30
1123	52484	c.31.1.4	Transhydrogenase domain III (dIII)	11	-25
1124	63984	c.31.1.5	Sir2 family of transcriptional regulators	17	-34
1125	52491	c.32.1.1	Tubulin, GTPase domain	4	-2
1126	100948	c.33.1.3	Isochorismatase-like hydrolases	32	-35
1127	52508	c.34.1.1	Homo-oligomeric flavin-containing Cys decarboxylases, HFCD	33	-16
1128	88760	c.36.1.10	TK-like PP module	11	-11
1129	88766	c.36.1.11	Branched-chain alpha-keto acid dehydrogenase PP module	22	-15
1130	88771	c.36.1.12	PFOR PP module	27	-12
1131	88724	c.36.1.5	Pyruvate oxidase and decarboxylase Pyr module	9	-13
1132	88735	c.36.1.6	TK-like Pyr module	7	-11
1133	88741	c.36.1.7	Branched-chain alpha-keto acid dehydrogenase Pyr module	23	-16
1134	88746	c.36.1.8	PFOR Pyr module	30	-6
1135	88749	c.36.1.9	Pyruvate oxidase and decarboxylase PP module	4	-16
1136	52541	c.37.1.1	Nucleotide and nucleoside kinases	3	-1
1137	64011	c.37.1.15	ATP sulfurylase C-terminal domain	1	-2
1138	69496	c.37.1.16	Helicase-like "domain" of reverse gyrase	9	-2
1139	75195	c.37.1.17	Gluconate kinase	28	-7
1140	75213	c.37.1.18	YjeE-like	2	-4
1141	81268	c.37.1.19	Tandem AAA-ATPase domain	2	-5
1142	52566	c.37.1.2	Shikimate kinase (AroK)	9	-4
1143	89678	c.37.1.22	Bacterial cell division inhibitor SulA	1	0
1144	52569	c.37.1.3	Chloramphenicol phosphotransferase	1	-1
1145	52572	c.37.1.4	Adenosine-5'phosphosulfate kinase (APS kinase)	3	-4
1146	52575	c.37.1.5	PAPS sulfotransferase	11	-4
1147	52584	c.37.1.6	Phosphoribulokinase/pantothenate kinase	14	-21
1148	52589	c.37.1.7	6-phosphofructo-2-kinase/fructose-2,6-bisphosphatase, kinase domain	2	-4
1149	52641	c.37.1.9	Motor proteins	1	0
1150	52729	c.38.1.1	PTS IIb component	8	-6
1151	52734	c.39.1.1	Nicotinate mononucleotide:5,6-dimethylbenzimidazole phosphoribosyltransferase (CobT)	16	-22
1152	51972	c.4.1.1	N-terminal domain of adrenodoxin reductase-like	27	-15
1153	51979	c.4.1.2	D-aminoacid oxidase, N-terminal domain	9	-3
1154	69427	c.4.1.3	UDP-galactopyranose mutase, N-terminal domain	25	0
1155	52739	c.40.1.1	Methylesterase CheB, C-terminal domain	19	-23
1156	52744	c.41.1.1	Subtilases	35	-24
1157	52764	c.41.1.2	Serine-carboxyl proteinase, SCP	18	-4
1158	52769	c.42.1.1	Arginase-like amidino hydrolases	29	-31
1159	52773	c.42.1.2	Histone deacetylase, HDAC	33	-22
1160	52778	c.43.1.1	CAT-like	14	-7
1161	75229	c.43.1.2	NRPS condensation domain (amide synthase)	3	-2
1162	82424	c.43.1.3	Choline/Carnitine O-acyltransferase	11	-1
1163	52789	c.44.1.1	Low-molecular-weight phosphotyrosine protein phosphatases	25	-47
1164	52795	c.44.2.1	PTS system, Lactose/Cellobiose specific IIB subunit	5	-2
1165	52800	c.45.1.1	Dual specificity phosphatase-like	5	-4
1166	52805	c.45.1.2	Higher-molecular-weight phosphotyrosine protein phosphatases	6	-4
1167	102422	c.45.1.3	Myotubularin-like phosphatases	4	-3
1168	52822	c.46.1.1	Cell cycle control phosphatase, catalytic domain	4	-10
1169	52827	c.46.1.2	Multidomain sulfurtransferase (rhodanese)	23	-12
1170	69509	c.46.1.3	Single-domain sulfurtransferase	3	-1
1171	52834	c.47.1.1	Thioltransferase	13	-8
1172	52901	c.47.1.10	Glutathione peroxidase-like	7	-19
1173	52918	c.47.1.11	Thioredoxin-like 2Fe-2S ferredoxin	2	0
1174	69518	c.47.1.12	ArsC-like	7	-10
1175	100953	c.47.1.13	DsbA-like	6	-5
1176	102446	c.47.1.14	SH3BGR (SH3-binding, glutamic acid-rich protein-like)	1	-4
1177	102449	c.47.1.15	KaiB-like	1	0
1178	110612	c.47.1.16	Txnl5-like	3	-6
1179	52849	c.47.1.2	PDI-like	31	-4
1180	52855	c.47.1.3	Calsequestrin	2	0
1181	52862	c.47.1.5	Glutathione S-transferase (GST), N-terminal domain	13	-3
1182	52888	c.47.1.6	Phosducin	1	-6
1183	52892	c.47.1.7	ERP29 N domain-like	3	-6
1184	52895	c.47.1.8	spliceosomal protein U5-15Kd	1	-9
1185	52898	c.47.1.9	DsbC/DsbG C-terminal domain-like	6	-5
1186	52923	c.48.1.1	Transketolase C-terminal domain-like	18	-13
1187	52926	c.48.1.2	Branched-chain alpha-keto acid dehydrogenase beta-subunit, C-terminal-domain	22	-17
1188	52931	c.48.1.3	Pyruvate-ferredoxin oxidoreductase, PFOR, domain II	24	-5
1189	52936	c.49.1.1	Pyruvate kinase, C-terminal domain	5	-2
1190	110616	c.49.1.2	MTH1675-like	8	-4
1191	52944	c.49.2.1	ATP synthase (F1-ATPase), gamma subunit	3	-4
1192	51985	c.5.1.1	MurCD N-terminal domain	13	-15
1193	52950	c.50.1.1	Leucine aminopeptidase (Aminopeptidase A), N-terminal domain	8	-8
1194	89724	c.50.1.2	Macro domain	47	-26
1195	52955	c.51.1.1	Anticodon-binding domain of Class II aaRS	16	-25
1196	52965	c.51.2.1	TolB, N-terminal domain	3	-3
1197	52969	c.51.3.1	Diol dehydratase, beta subunit	7	0
1198	52973	c.51.4.1	ITPase (Ham1)	22	-9
1199	52976	c.51.4.2	Maf-like	21	-30
1200	110621	c.51.4.3	YjjX-like	6	-4
1201	53008	c.52.1.10	Restriction endonuclease NgoIV	2	0
1202	53011	c.52.1.11	Restriction endonuclease BsobI	3	0
1203	53020	c.52.1.14	DNA mismatch repair protein MutH from	3	0
1204	53023	c.52.1.15	Very short patch repair (VSR) endonuclease	20	-1
1205	53026	c.52.1.16	TnsA endonuclease, N-terminal domain	11	0
1206	64080	c.52.1.18	Hjc-like	2	0
1207	52984	c.52.1.2	Restriction endonuclease EcoRV	2	0
1208	89716	c.52.1.20	XPF/Rad1/Mus81 nuclease	2	-5
1209	102474	c.52.1.22	Type II restriction endonuclease catalytic domain	4	0
1210	53033	c.52.2.1	tRNA-intron endonuclease catalytic domain-like	3	0
1211	53037	c.52.3.1	Eukaryotic RPB5 N-terminal domain	4	-4
1212	53042	c.53.1.1	gamma,delta resolvase, catalytic domain	22	0
1213	53057	c.53.2.1	beta-carbonic anhydrase, cab	23	-24
1214	53063	c.54.1.1	EIIA-man component-like	5	0
1215	53068	c.55.1.1	Actin/HSP70	2	-2
1216	110636	c.55.1.10	ROK	2	-4
1217	53080	c.55.1.2	Acetokinase-like	27	-26
1218	53083	c.55.1.3	Hexokinase	7	0
1219	53089	c.55.1.4	Glycerol kinase	15	-26
1220	64089	c.55.1.5	BadF/BadG/BcrA/BcrD-like	8	-8
1221	82440	c.55.1.6	ATPase domain of dehydratase reactivase alpha subunit	5	0
1222	110627	c.55.1.7	Glucokinase	19	-10
1223	110633	c.55.1.9	YeaZ-like	1	-2
1224	53093	c.55.2.1	Creatinase/prolidase N-terminal domain	17	-6
1225	53099	c.55.3.1	Ribonuclease H	17	-28
1226	110640	c.55.3.10	PIWI domain	2	0
1227	53112	c.55.3.3	mu transposase, core domain	3	0
1228	53115	c.55.3.4	Transposase inhibitor (Tn5 transposase)	10	-1
1229	53118	c.55.3.5	DnaQ-like 3'-5' exonuclease	18	-24
1230	53134	c.55.3.6	RuvC resolvase	10	-13
1231	69533	c.55.3.7	Mitochondrial resolvase ydc2 catalytic domain	1	0
1232	102485	c.55.3.8	Putative Holliday junction resolvase RuvX	14	-1
1233	102492	c.55.3.9	CAF1-like ribonuclease	1	-3
1234	53138	c.55.4.1	Ribosomal protein L18 and S11	14	-9
1235	53143	c.55.4.2	ERF1/Dom34 middle domain-like	1	-4
1236	53147	c.55.5.1	MTH1175-like	3	0
1237	102496	c.55.5.2	Nitrogenase accessory factor	3	0
1238	53151	c.55.6.1	DNA repair protein MutS, domain II	5	-2
1239	53156	c.55.7.1	Methylated DNA-protein cysteine methyltransferase domain	8	0
1240	53164	c.56.1.1	Hydrogenase maturating endopeptidase HybD	17	-4
1241	64095	c.56.1.2	Germination protease	2	-2
1242	53168	c.56.2.1	Purine and uridine phosphorylases	4	-13
1243	53179	c.56.3.1	Peptidyl-tRNA hydrolase-like	11	-7
1244	53183	c.56.4.1	Pyrrolidone carboxyl peptidase (pyroglutamate aminopeptidase)	28	-8
1245	53188	c.56.5.1	Pancreatic carboxypeptidases	8	0
1246	53198	c.56.5.2	Carboxypeptidase T	4	-1
1247	53201	c.56.5.3	Leucine aminopeptidase, C-terminal domain	11	-13
1248	53204	c.56.5.4	Bacterial dinuclear zinc exopeptidases	13	-21
1249	53210	c.56.5.5	FolH catalytic domain-like	1	-1
1250	102517	c.56.5.6	N-acetylmuramoyl-L-alanine amidase-like	11	-10
1251	53214	c.56.6.1	LigB-like	9	-3
1252	53219	c.57.1.1	MogA-like	21	-21
1253	64103	c.57.1.2	MoeA central domain-like	27	-21
1254	53224	c.58.1.1	Aminoacid dehydrogenases	14	-39
1255	53235	c.58.1.2	Tetrahydrofolate dehydrogenase/cyclohydrolase	14	-32
1256	53240	c.58.1.3	Malic enzyme N-domain	6	-26
1257	82333	c.58.1.4	Methylene-tetrahydromethanopterin dehydrogenase	5	0
1258	82336	c.58.1.5	Shikimate dehydrogenase-like	29	-11
1259	53245	c.59.1.1	MurCDEF C-terminal domain	7	-12
1260	53250	c.59.1.2	Folylpolyglutamate synthetase, C-terminal domain	1	0
1261	51990	c.6.1.1	Glycosyl hydrolases family 6, cellulases	11	-2
1262	88714	c.6.2.1	alpha-mannosidase	2	-3
1263	89554	c.6.2.2	4-alpha-glucanotransferase, N-terminal domain	6	0
1264	89559	c.6.2.3	NodB-like polysaccharide deacetylase	12	-4
1265	102189	c.6.2.4	AmyC N-terminal domain-like	15	-5
1266	89551	c.6.3.1	PHP domain	5	-7
1267	110442	c.6.3.2	RNase P subunit p30	1	0
1268	53255	c.60.1.1	Cofactor-dependent phosphoglycerate mutase	36	-13
1269	53258	c.60.1.2	Histidine acid phosphatase	7	-5
1270	53267	c.60.1.4	6-phosphofructo-2-kinase/fructose-2,6-bisphosphatase, phosphatase domain	3	-5
1271	53272	c.61.1.1	Phosphoribosyltransferases (PRTases)	1	0
1272	53296	c.61.1.2	Phosphoribosylpyrophosphate synthetase-like	5	-9
1273	53301	c.62.1.1	Integrin A (or I) domain	2	0
1274	82458	c.62.1.2	Trunk domain of Sec23/24	1	0
1275	100959	c.62.1.3	Ku70 subunit N-terminal domain	5	-3
1276	100962	c.62.1.4	Ku80 subunit N-terminal domain	1	-4
1277	53324	c.64.1.1	Pyruvate-ferredoxin oxidoreductase, PFOR, domain III	24	-4
1278	53329	c.65.1.1	Formyltransferase	5	-11
1279	53336	c.66.1.1	COMT-like	15	-4
1280	53377	c.66.1.11	Type II DNA methylase	7	0
1281	64111	c.66.1.12	Plant O-methyltransferase, C-terminal domain	12	-2
1282	64117	c.66.1.13	tRNA(1-methyladenosine) methyltransferase-like	15	-5
1283	69544	c.66.1.14	Hypothetical protein HI0319 (YecO)	10	-1
1284	69547	c.66.1.15	Arylamine N-methyltransferase	1	-6
1285	69550	c.66.1.16	Guanidinoacetate methyltransferase	3	-3
1286	69557	c.66.1.17	Spermidine synthase	34	-23
1287	69560	c.66.1.18	Mycolic acid cyclopropane synthase	28	-22
1288	75261	c.66.1.19	Histamine methyltransferase	1	-1
1289	53339	c.66.1.2	RNA methyltransferase FtsJ	21	-11
1290	75264	c.66.1.20	Glucose-inhibited division protein B (GidB)	5	-2
1291	82469	c.66.1.21	Hypothetical Protein YjhP	11	-2
1292	82472	c.66.1.22	Precorrin-6Y methyltransferase (CbiT)	1	0
1293	82475	c.66.1.23	MraW-like putative methyltransferases	13	-6
1294	88784	c.66.1.24	rRNA adenine dimethylase-like	25	-10
1295	88786	c.66.1.26	C5 cytosine-specific DNA methylase, DCM	38	-12
1296	88788	c.66.1.28	N6 adenine-specific DNA methylase, DAM	30	-8
1297	53342	c.66.1.3	Fibrillarin homologue	2	-8
1298	89743	c.66.1.30	N5-glutamine methyltransferase, HemK	16	-14
1299	89746	c.66.1.31	Catalytic, N-terminal domain of histone methyltransferase Dot1l	5	-9
1300	89751	c.66.1.32	Ta1320-like	1	0
1301	102557	c.66.1.33	rRNA methyltransferase RlmA	9	-4
1302	102560	c.66.1.34	mRNA cap (Guanine N-7) methyltransferase	11	-3
1303	102563	c.66.1.35	Salicylic acid carboxyl methyltransferase (SAMT)	2	0
1304	102566	c.66.1.36	Thiopurine S-methyltransferase	14	-2
1305	102569	c.66.1.37	Leucine carboxy methyltransferase Ppm1	11	-9
1306	102575	c.66.1.38	NOL1/NOP2/sun	18	-17
1307	102578	c.66.1.39	Ribosomal protein L11 methyltransferase PrmA	6	0
1308	53345	c.66.1.4	Hypothetical protein MJ0882	7	-1
1309	102581	c.66.1.40	(Uracil-5-)-methyltransferase	25	-15
1310	110671	c.66.1.41	UbiE/COQ5-like	13	-2
1311	53348	c.66.1.5	Glycine N-methyltransferase	3	-5
1312	53351	c.66.1.6	Arginine methyltransferase	1	0
1313	53354	c.66.1.7	Protein-L-isoaspartyl O-methyltransferase	32	-22
1314	53357	c.66.1.8	Chemotaxis receptor methyltransferase CheR, C-terminal domain	19	-16
1315	53384	c.67.1.1	AAT-like	1	-1
1316	53397	c.67.1.2	Beta-eliminating lyases	28	-3
1317	53417	c.67.1.4	GABA-aminotransferase-like	1	-1
1318	53444	c.67.1.5	Ornithine decarboxylase major domain	16	-7
1319	69565	c.67.1.6	Pyridoxal-dependent decarboxylase	34	-21
1320	53449	c.68.1.1	Spore coat polysaccharide biosynthesis protein SpsA	2	-1
1321	64136	c.68.1.10	N-acetylglucosaminyltransferase I	1	-6
1322	68901	c.68.1.13	Cytidylytransferase	26	-17
1323	75273	c.68.1.14	Glycogenin	6	-6
1324	89760	c.68.1.15	Exostosin	4	0
1325	102609	c.68.1.16	Glycolipid 2-alpha-mannosyltransferase	5	0
1326	53452	c.68.1.2	beta 1,4 galactosyltransferase (b4GalT1)	3	0
1327	53461	c.68.1.5	UDP-glucose pyrophosphorylase	2	-10
1328	53464	c.68.1.6	glucose-1-phosphate thymidylyltransferase	23	-34
1329	53467	c.68.1.7	1,3-glucuronyltransferase	3	-2
1330	53470	c.68.1.8	Molybdenum cofactor biosynthesis protein MobA	6	-6
1331	64131	c.68.1.9	alpha-1,3-galactosyltransferase-like	1	0
1332	53475	c.69.1.1	Acetylcholinesterase-like	17	-4
1333	53522	c.69.1.10	Carbon-carbon bond hydrolase	12	-1
1334	53525	c.69.1.11	Epoxide hydrolase	26	-16
1335	53531	c.69.1.12	Haloperoxidase	34	-8
1336	53542	c.69.1.13	Thioesterases	3	-8
1337	53547	c.69.1.14	Carboxylesterase/thioesterase 1	4	-18
1338	53552	c.69.1.15	A novel bacterial esterase	7	0
1339	53555	c.69.1.16	Lipase	3	-1
1340	53558	c.69.1.17	Fungal lipases	8	-6
1341	53570	c.69.1.18	Bacterial lipase	16	-8
1342	53577	c.69.1.19	Pancreatic lipase, N-terminal domain	1	-1
1343	53487	c.69.1.2	Carboxylesterase	54	-18
1344	53585	c.69.1.20	Hydroxynitrile lyase-like	1	-1
1345	69581	c.69.1.21	PepX catalytic domain-like	24	-2
1346	69584	c.69.1.22	Thioesterase domain of polypeptide, polyketide and fatty acid synthases	2	-1
1347	75285	c.69.1.23	Ccg1/TafII250-interacting factor B (Cib)	2	-5
1348	82497	c.69.1.24	DPP6 catalytic domain-like	13	-8
1349	82504	c.69.1.25	Acetyl xylan esterase-like	11	-4
1350	82509	c.69.1.26	Biotin biosynthesis protein BioH	4	-1
1351	102620	c.69.1.28	Aclacinomycin methylesterase RdmC	2	-1
1352	102623	c.69.1.29	Carboxylesterase/lipase	3	0
1353	53491	c.69.1.3	Mycobacterial antigens	1	-1
1354	52260	c.69.1.30	Cutinase-like	3	0
1355	110699	c.69.1.31	YdeN-like	4	0
1356	110702	c.69.1.32	Putative serine hydrolase Ydr428c	1	-2
1357	53496	c.69.1.4	Prolyl oligopeptidase, C-terminal domain	15	-22
1358	53499	c.69.1.5	Serine carboxypeptidase-like	3	-4
1359	53506	c.69.1.6	Gastric lipase	3	-7
1360	53509	c.69.1.7	Proline iminopeptidase-like	35	-19
1361	53513	c.69.1.8	Haloalkane dehalogenase	11	-4
1362	53518	c.69.1.9	Dienelactone hydrolase	9	-1
1363	51999	c.7.1.1	PFL-like	26	-4
1364	52002	c.7.1.2	R1 subunit of ribonucleotide reductase, C-terminal domain	23	-16
1365	52005	c.7.1.3	Class III anaerobic ribonucleotide reductase NRDD subunit	11	-7
1366	75131	c.7.1.4	B12-dependent (class II) ribonucleotide reductase	11	-2
1367	53591	c.70.1.1	Nucleoside hydrolase	29	-23
1368	53598	c.71.1.1	Dihydrofolate reductases	19	-25
1369	53614	c.72.1.1	Ribokinase-like	28	-12
1370	53620	c.72.1.2	Thiamin biosynthesis kinases	5	-29
1371	64147	c.72.1.3	ADP-specific Phosphofructokinase/Glucokinase	5	0
1372	75292	c.72.1.4	YjeF C-terminal domain-like	16	-18
1373	82515	c.72.1.5	PfkB-like kinase	12	-18
1374	53624	c.72.2.1	MurCDEF	9	-9
1375	53629	c.72.2.2	Folylpolyglutamate synthetase	5	-30
1376	102646	c.72.3.1	CoaB-like	1	-6
1377	53634	c.73.1.1	Carbamate kinase	34	-9
1378	75297	c.73.1.2	N-acetyl-l-glutamate kinase	20	-1
1379	53640	c.74.1.1	AraD-like aldolase/epimerase	30	-18
1380	53650	c.76.1.1	Alkaline phosphatase	36	-10
1381	53653	c.76.1.2	Arylsulfatase	40	-15
1382	64162	c.76.1.3	2,3-Bisphosphoglycerate-independent phosphoglycerate mutase, catalytic domain	18	-22
1383	102651	c.76.1.4	Phosphonoacetate hydrolase	7	-1
1384	53660	c.77.1.1	Dimeric isocitrate & isopropylmalate dehydrogenases	3	-6
1385	82526	c.77.1.2	Monomeric isocitrate dehydrogenase	22	-11
1386	102656	c.77.1.3	PdxA-like	17	-8
1387	102660	c.77.1.4	PlsX-like	2	-10
1388	102663	c.77.1.5	Phosphotransacetylase	21	-13
1389	53672	c.78.1.1	Aspartate/ornithine carbamoyltransferase	1	-3
1390	53682	c.78.2.1	Aspartate/glutamate racemase	23	-13
1391	53687	c.79.1.1	Tryptophan synthase beta subunit-like PLP-dependent enzymes	1	-1
1392	52010	c.8.1.1	Pyruvate phosphate dikinase, central domain	12	-10
1393	52013	c.8.1.2	N-terminal domain of enzyme I of the PEP:sugar phosphotransferase system	1	-1
1394	52017	c.8.2.1	LeuD-like	16	-13
1395	52022	c.8.3.1	Carbamoyl phosphate synthetase, small subunit N-terminal domain	10	-24
1396	52026	c.8.4.1	PA domain	1	-4
1397	52030	c.8.5.1	GroEL-like chaperone, apical domain	4	-8
1398	52034	c.8.5.2	Group II chaperonin (CCT, TRIC), apical domain	2	-6
1399	82318	c.8.6.1	Swiveling domain of dehydratase reactivase alpha subunit	5	0
1400	89563	c.8.7.1	RraA-like	15	-9
1401	102199	c.8.8.1	Putative cyclase	20	-7
1402	53698	c.80.1.1	double-SIS domain	1	-7
1403	53701	c.80.1.2	Phosphoglucose isomerase, PGI	5	-16
1404	69599	c.80.1.3	mono-SIS domain	18	-34
1405	53707	c.81.1.1	Formate dehydrogenase/DMSO reductase, domains 1-3	18	-17
1406	53721	c.82.1.1	ALDH-like	3	-5
1407	69602	c.82.1.2	L-histidinol dehydrogenase HisD	5	-12
1408	53733	c.83.1.1	Aconitase iron-sulfur domain	3	-5
1409	53739	c.84.1.1	Phosphoglucomutase, first 3 domains	15	-14
1410	53744	c.85.1.1	L-fucose isomerase, N-terminal and second domains	5	-1
1411	53749	c.86.1.1	Phosphoglycerate kinase	1	-4
1412	53760	c.87.1.2	Peptidoglycan biosynthesis glycosyltransferase MurG	6	-10
1413	53763	c.87.1.3	UDP-N-acetylglucosamine 2-epimerase	29	-29
1414	53766	c.87.1.4	Oligosaccharide phosphorylase	25	-27
1415	64178	c.87.1.5	Gtf glycosyltransferase	13	-5
1416	82540	c.87.1.6	Trehalose-6-phosphate synthase, OtsA	27	-20
1417	89784	c.87.1.7	ADP-heptose LPS heptosyltransferase II	15	-3
1418	110734	c.87.1.8	Glycosyl transferases group 1	21	-32
1419	53775	c.88.1.1	Glutaminase/Asparaginase	29	-18
1420	53785	c.89.1.1	Phosphofructokinase	10	-18
1421	52039	c.9.1.1	Barstar-related	1	-1
1422	52043	c.9.2.1	Ribosomal protein L32e	4	-5
1423	53791	c.90.1.1	Tetrapyrrole methylase	3	-13
1424	53796	c.91.1.1	PEP carboxykinase C-terminal domain	9	-28
1425	64186	c.91.1.2	HPr kinase HprK C-terminal domain	13	-3
1426	53801	c.92.1.1	Ferrochelatase	21	-19
1427	53804	c.92.1.2	Cobalt chelatase CbiK	8	-1
1428	53808	c.92.2.1	Periplasmic ferric siderophore binding protein FhuD	8	0
1429	53811	c.92.2.2	TroA-like	12	-22
1430	53816	c.92.2.3	Nitrogenase iron-molybdenum protein	24	-11
1431	53823	c.93.1.1	L-arabinose binding protein-like	14	-15
1432	53851	c.94.1.1	Phosphate binding protein-like	1	-1
1433	53888	c.94.1.2	Transferrin	2	-1
1434	53902	c.95.1.1	Thiolase-related	2	-4
1435	53914	c.95.1.2	Chalcone synthase-like	10	-14
1436	53921	c.96.1.1	Fe-only hydrogenase	8	-22
1437	53928	c.97.1.1	Cytidine deaminase	20	-19
1438	89800	c.97.1.2	Deoxycytidylate deaminase-like	38	-16
1439	64198	c.97.2.1 changed to c.97.1.4	AICAR transformylase domain of bifunctional purine biosynthesis enzyme ATIC	2	-16
1440	102713	c.97.3.1	JAB1/MPN domain	4	-1
1441	63419	c.98.1.1	MurE/MurF N-terminal domain	3	-3
1442	75139	c.98.2.1	HPr kinase/phoshatase HprK N-terminal domain	2	-2
1443	63993	c.99.1.1	Dipeptide transport protein	12	-9
1444	81307	d.1.1.2	Bacterial ribonucleases	10	-7
1445	81310	d.1.1.3	Ribotoxin	2	-1
1446	81311	d.1.1.4	Fungal ribonucleases	3	0
1447	54175	d.10.1.2	GCC-box binding domain	2	0
1448	54178	d.10.1.3	Methyl-CpG-binding domain, MBD	1	-3
1449	55659	d.100.1.1	Ribosomal protein L9 N-domain	2	0
1450	55662	d.100.1.2	N-terminal domain of RNase HI	2	0
1451	55667	d.101.1.1	Ribonuclease PH domain 2-like	19	-5
1452	55707	d.104.1.2	Biotin holoenzyme synthetase	10	-4
1453	55712	d.105.1.1	Clathrin adaptor appendage, alpha and beta chain-specific domain	3	0
1454	103159	d.105.1.2	Coatomer appendage domain	2	-7
1455	55719	d.106.1.1	Sterol carrier protein, SCP	3	-3
1456	55725	d.107.1.1	Ran-binding protein mog1p	1	0
1457	111092	d.107.1.2	PsbP-like	1	0
1458	111095	d.107.1.3	PA0094-like	1	0
1459	55730	d.108.1.1	N-acetyl transferase, NAT	28	-15
1460	55748	d.108.1.2	N-myristoyl transferase, NMT	1	-3
1461	75508	d.108.1.3	Autoinducer synthetase	5	0
1462	82749	d.108.1.4	FemXAB nonribosomal peptidyltransferases	1	0
1463	103179	d.108.1.5	Hypothetical protein cg14615-pa	3	0
1464	55754	d.109.1.1	Gelsolin-like	7	-6
1465	55762	d.109.1.2	Cofilin-like	1	-6
1466	82755	d.109.2.1	C-terminal, gelsolin-like domain of Sec23/24	1	-2
1467	55771	d.110.1.1	Profilin (actin-binding protein)	6	-12
1468	55782	d.110.2.1	GAF domain	26	-18
1469	75513	d.110.2.2	IclR ligand-binding domain-like	23	-11
1470	111115	d.110.2.3	HrcA C-terminal domain-like	1	0
1471	55786	d.110.3.1	PYP-like	2	0
1472	55789	d.110.3.2	Heme-binding PAS domain	8	-2
1473	82764	d.110.3.5	N-terminal PAS domain of Pas kinase	1	-4
1474	88853	d.110.3.6	Flavin-binding PAS domain	3	-7
1475	103184	d.110.3.7	Hypoxia-inducible factor Hif2a, C-terminal domain	1	-3
1476	103187	d.110.3.8	PAS domain of steroid receptor coactivator 1A, NCo-A1	1	-3
1477	64357	d.110.4.1	Synatpobrevin N-terminal domain	4	-6
1478	75521	d.110.4.2	Clathrin coat assembly domain	1	0
1479	82767	d.110.4.3	Sedlin (SEDL)	10	-10
1480	90019	d.110.4.4	SRP alpha N-terminal domain-like	1	0
1481	103191	d.110.6.1	Sensory domain of two-component sensor kinase	4	-2
1482	103197	d.110.7.1	Roadblock/LC7 domain	2	-3
1483	55798	d.111.1.1	PR-1-like	9	-4
1484	55805	d.112.1.1	IIA domain of mannitol-specific and ntr phosphotransferase EII	16	-7
1485	64362	d.112.1.2	Anion transport protein, cytoplasmic domain	1	0
1486	55812	d.113.1.1	MutT-like	17	-13
1487	64369	d.113.1.2	IPP isomerase-like	4	-1
1488	103211	d.113.1.3	MutY C-terminal domain-like	1	0
1489	103214	d.113.1.4	NADH pyrophosphatase	3	-1
1490	111132	d.113.1.5	GDP-mannose mannosyl hydrolase NudD	4	0
1491	55817	d.114.1.1	5'-nucleotidase (syn. UDP-sugar hydrolase), C-terminal domain	9	-3
1492	55822	d.115.1.1	YrdC-like	21	-29
1493	64372	d.115.1.2	3,4-dihydroxy-2-butanone 4-phosphate synthase, DHBP synthase, RibB	9	-17
1494	55827	d.116.1.1	YbaK/ProRS associated domain	28	-13
1495	55832	d.117.1.1	Thymidylate synthase/dCMP hydroxymethylase	14	-12
1496	55847	d.118.1.1	N-acetylmuramoyl-L-alanine amidase-like	6	-4
1497	54190	d.12.1.1	L23p	5	-3
1498	54193	d.12.1.2	L15e	2	-4
1499	55857	d.120.1.1	Cytochrome b5	6	-8
1500	103222	d.120.1.2	Steroid-binding domain	6	-1
1501	55875	d.122.1.1	Heat shock protein 90, HSP90, N-terminal domain	19	-20
1502	55879	d.122.1.2	DNA gyrase/MutL, N-terminal domain	2	-3
1503	55884	d.122.1.3	Histidine kinase	16	-19
1504	69804	d.122.1.4	alpha-ketoacid dehydrogenase kinase, C-terminal domain	2	-6
1505	55891	d.123.1.1	Sporulation response regulatory protein Spo0B	1	-1
1506	55896	d.124.1.1	Ribonuclease Rh-like	3	-13
1507	55905	d.125.1.1	Ornithine decarboxylase C-terminal domain	10	-1
1508	55910	d.126.1.1	Ribosome anti-association factor eIF6 (aIF6)	2	-9
1509	55914	d.126.1.2	Amidinotransferase	14	-5
1510	64380	d.126.1.3	Dimethylarginine dimethylaminohydrolase DDAH	7	0
1511	103232	d.126.1.4	Arginine deiminase	24	-4
1512	111152	d.126.1.5	Peptidylarginine deiminase Pad4, catalytic C-terminal domain	5	-1
1513	111155	d.126.1.6	Porphyromonas-type peptidylarginine deiminase	37	-15
1514	55932	d.128.1.1	Glutamine synthetase catalytic domain	10	-14
1515	55935	d.128.1.2	Guanido kinase catalytic domain	13	-5
1516	111160	d.128.1.3	Glutamate-cysteine ligase family 2 (GCS2)	15	-11
1517	55946	d.129.1.1	TATA-box binding protein (TBP), C-terminal domain	8	-7
1518	55952	d.129.1.2	DNA repair glycosylase, N-terminal domain	4	-1
1519	55958	d.129.2.1	Phosphoglucomutase, C-terminal domain	13	-8
1520	55962	d.129.3.1	Pathogenesis-related protein 10 (PR10)-like	1	-2
1521	55966	d.129.3.2	STAR domain	2	-3
1522	55969	d.129.3.3	Ring hydroxylating alpha subunit catalytic domain	7	0
1523	64388	d.129.3.4	Phoshatidylinositol transfer protein, PITP	4	-2
1524	111168	d.129.3.5	AHSA1 domain	13	-3
1525	64384	d.129.4.1	Cell-division protein ZipA, C-terminal domain	1	-3
1526	103244	d.129.6.1	Kinase associated domain 1, KA1	4	-7
1527	103248	d.129.7.1	TT1751-like	15	-3
1528	111172	d.129.8.1	Rbstp2229 protein	1	0
1529	54198	d.13.1.1	HIT (HINT, histidine triad) family of protein kinase-interacting proteins	23	-12
1530	54207	d.13.1.2	Hexose-1-phosphate uridylyltransferase	20	-11
1531	102745	d.13.1.3	mRNA decapping enzyme DcpS C-terminal domain	4	-7
1532	55974	d.130.1.1	S-adenosylmethionine synthetase	3	-4
1533	55980	d.131.1.1	DNA polymerase III, beta subunit	3	-4
1534	55983	d.131.1.2	DNA polymerase processivity factor	8	-6
1535	56004	d.133.1.1	Molybdenum cofactor-binding domain	31	-23
1536	56015	d.134.1.1	Nitrite and sulphite reductase 4Fe-4S domain-like	13	-7
1537	56020	d.135.1.1	The spindle assembly checkpoint protein mad2	1	-5
1538	56025	d.136.1.1	Nuclease	4	0
1539	69815	d.136.1.3	Tyrosyl-DNA phosphodiesterase TDP1	4	-7
1540	56030	d.137.1.1	Monooxygenase (hydroxylase) regulatory protein	4	0
1541	56038	d.138.1.1 changed to b.153.1.1	B3/B4 domain of PheRS, PheT	2	-2
1542	56043	d.139.1.1	PurM C-terminal domain-like	3	-9
1543	54212	d.14.1.1	Translational machinery components	2	-5
1544	102769	d.14.1.10	ATP-dependent protease Lon (La), catalytic domain	8	-13
1545	102772	d.14.1.11	YigZ N-terminal domain-like	15	-4
1546	54220	d.14.1.2	RNase P protein	2	-2
1547	54224	d.14.1.3	DNA gyrase/MutL, second domain	1	-3
1548	54229	d.14.1.4	Ribonuclease PH domain 1-like	6	-12
1549	54232	d.14.1.5	GHMP Kinase, N-terminal domain	13	-23
1550	89827	d.14.1.7	UDP-3-O-[3-hydroxymyristoyl] N-acetylglucosamine deacetylase LpxC	13	-1
1551	102755	d.14.1.8	Hsp90 middle domain	14	-20
1552	102766	d.14.1.9	Imidazole glycerol phosphate dehydratase	19	-8
1553	56048	d.140.1.1	Ribosomal protein S8	3	-8
1554	56054	d.141.1.1	Ribosomal protein L6	12	-16
1555	56060	d.142.1.1	ATP-binding domain of peptide synthetases	22	-14
1556	56067	d.142.1.2	BC ATP-binding domain-like	1	-1
1557	56078	d.142.1.3	Synapsin C-terminal domain	2	-3
1558	56081	d.142.1.4	Succinyl-CoA synthetase, beta-chain, N-terminal domain	6	-16
1559	56085	d.142.1.5	Pyruvate phosphate dikinase, N-terminal domain	26	-14
1560	56088	d.142.1.6	Eukaryotic glutathione synthetase ATP-binding domain	1	-2
1561	103281	d.142.1.7	Lysine biosynthesis enzyme LysX ATP-binding domain	9	-1
1562	56096	d.142.2.2	Adenylation domain of NAD+-dependent DNA ligase	7	-4
1563	56100	d.142.2.3	mRNA capping enzyme	7	0
1564	56105	d.143.1.1	SAICAR synthase	5	-17
1565	56108	d.143.1.2	Phosphatidylinositol phosphate kinase IIbeta, PIPK IIbeta	1	-3
1566	111188	d.143.1.3	Inositol polyphosphate kinase (IPK)	3	0
1567	56168	d.144.1.3	Actin-fragmin kinase, catalytic domain	2	0
1568	56171	d.144.1.4	Phoshoinositide 3-kinase (PI3K), catalytic domain	1	-1
1569	64408	d.144.1.5	MHCK/EF2 kinase	4	-1
1570	64411	d.144.1.6	APH phosphotransferases	8	0
1571	88854	d.144.1.7	Protein kinases, catalytic subunit	23	-12
1572	90040	d.144.1.8	Choline kinase	11	-6
1573	111204	d.144.1.9	RIO1-like kinases	6	-2
1574	56177	d.145.1.1	FAD-linked oxidases, N-terminal domain	37	-4
1575	56184	d.145.1.2	Uridine diphospho-N-Acetylenolpyruvylglucosamine reductase (MurB), N-terminal domain	16	-8
1576	56187	d.145.1.3	CO dehydrogenase flavoprotein N-terminal domain-like	33	-10
1577	56195	d.146.1.1	Uridine diphospho-N-Acetylenolpyruvylglucosamine reductase, MurB, C-terminal domain	12	-9
1578	56200	d.147.1.1	Methenyltetrahydromethanopterin cyclohydrolase	9	0
1579	56205	d.148.1.1	Hect, E3 ligase catalytic domain	1	0
1580	56210	d.149.1.1	Nitrile hydratase alpha chain	11	-1
1581	54237	d.15.1.1	Ubiquitin-related	1	0
1582	54250	d.15.1.2	UBX domain	2	-2
1583	54253	d.15.1.3	GABARAP-like	3	-7
1584	54256	d.15.1.4	First domain of FERM	2	-1
1585	54263	d.15.1.5	Ras-binding domain, RBD	2	0
1586	75362	d.15.1.6	BM-002-like	9	-6
1587	81270	d.15.10.1	TGS domain	3	-1
1588	82583	d.15.10.2	G domain-linked domain	11	-14
1589	89838	d.15.11.1	Doublecortin (DC)	1	-7
1590	54278	d.15.2.1	CAD domain	1	-3
1591	64225	d.15.2.2	PB1 domain	3	-8
1592	54286	d.15.3.1	MoaD	3	-1
1593	54289	d.15.3.2	ThiS	2	0
1594	54293	d.15.4.1	2Fe-2S ferredoxin-related	19	-13
1595	54312	d.15.4.2	2Fe-2S ferredoxin domains from multidomain proteins	16	-13
1596	54365	d.15.8.1	Translation initiation factor IF3, N-terminal domain	14	-7
1597	54369	d.15.9.1	Glutamine synthetase, N-terminal domain	10	-5
1598	56215	d.150.1.1	4'-Phosphopantetheinyl transferase SFP	2	0
1599	64418	d.150.1.2	Holo-(acyl carrier protein) synthase ACPS	2	-3
1600	56220	d.151.1.1	DNase I-like	18	-20
1601	64422	d.151.1.2	Inositol polyphosphate 5-phosphatase (IPP5)	1	-2
1602	56229	d.152.1.1	Aldehyde ferredoxin oxidoreductase, N-terminal domain	17	-10
1603	56236	d.153.1.1	Class II glutamine amidotransferases	1	-1
1604	56244	d.153.1.2	Penicillin acylase, catalytic domain	29	-10
1605	56248	d.153.1.3	Penicillin V acylase	14	-5
1606	56251	d.153.1.4	Proteasome subunits	8	-15
1607	56261	d.153.1.5	(Glycosyl)asparaginase	26	-16
1608	75570	d.153.2.1	Archaeal IMP cyclohydrolase PurO	5	0
1609	56267	d.154.1.1	DmpA-like	20	-7
1610	111219	d.154.1.2	ArgJ-like	6	-16
1611	56272	d.155.1.1	Histidine decarboxylase	4	0
1612	90046	d.155.1.2	Arginine decarboxylase	3	-2
1613	56277	d.156.1.1	S-adenosylmethionine decarboxylase	3	-9
1614	111222	d.156.1.2	Bacterial S-adenosylmethionine decarboxylase	9	-3
1615	56282	d.157.1.1	Zn metallo-beta-lactamase	11	-3
1616	56288	d.157.1.2	Glyoxalase II (hydroxyacylglutathione hydrolase)	6	-10
1617	56291	d.157.1.3	ROO N-terminal domain-like	10	-7
1618	103317	d.157.1.4	Hypothetical protein TM0207	11	-9
1619	111227	d.157.1.5	Methyl parathion hydrolase	12	-7
1620	56301	d.159.1.1	Purple acid phosphatase-like	3	-8
1621	56307	d.159.1.2	5'-nucleotidase (syn. UDP-sugar hydrolase), N-terminal domain	14	-3
1622	56310	d.159.1.3	Protein serine/threonine phosphatase	12	-2
1623	64427	d.159.1.4	DNA double-strand break repair nuclease	3	-1
1624	82803	d.159.1.5	Phosphoesterase-related	2	0
1625	103320	d.159.1.6	TT1561-like	2	-1
1626	111233	d.159.1.7	YfcE-like	14	-5
1627	54374	d.16.1.1	GMC oxidoreductases	11	-1
1628	54378	d.16.1.2	PHBH-like	23	-10
1629	54384	d.16.1.3	D-aminoacid oxidase-like	5	-3
1630	54394	d.16.1.5	L-aminoacid/polyamine oxidase	14	-3
1631	54399	d.16.1.6	GDI-like	7	-10
1632	69670	d.16.1.7	UDP-galactopyranose mutase	4	0
1633	56318	d.160.1.1	Nitrilase	16	-6
1634	64433	d.160.1.2	Carbamilase	15	0
1635	56323	d.161.1.1	ADC synthase	3	-7
1636	56328	d.162.1.1	Lactate & malate dehydrogenases, C-terminal domain	9	-20
1637	90050	d.162.1.2	AglA-like glucosidase	10	-2
1638	56350	d.163.1.1	Lambda integrase-like, catalytic core	9	-14
1639	56361	d.163.1.2	Eukaryotic DNA topoisomerase I, catalytic core	2	-5
1640	56367	d.164.1.1	SMAD MH1 domain	1	0
1641	56400	d.166.1.1	ADP-ribosylating toxins	2	0
1642	56416	d.166.1.2	Poly(ADP-ribose) polymerase, C-terminal domain	7	-5
1643	82814	d.166.1.3	Ecto-ART	1	-1
1644	56421	d.167.1.1	Peptide deformylase	10	-5
1645	56426	d.168.1.1	Succinate dehydrogenase/fumarate reductase flavoprotein, catalytic domain	3	-27
1646	56437	d.169.1.1	C-type lectin domain	2	0
1647	56477	d.169.1.4	Link domain	1	0
1648	56480	d.169.1.5	Endostatin	1	-2
1649	75585	d.169.1.6	Noncollagenous (NC1) domain of collagen IV	1	-2
1650	54407	d.17.1.2	Cystatins	2	-1
1651	82592	d.17.1.3	Cathelicidin motif	1	-3
1652	54417	d.17.2.1	Amine oxidase N-terminal region	6	-7
1653	54428	d.17.4.1	Scytalone dehydratase	1	-2
1654	102813	d.17.4.10	PhzA/PhzB-like	1	-1
1655	110829	d.17.4.12	PA1314-like	2	0
1656	54431	d.17.4.2	NTF2-like	5	-7
1657	54438	d.17.4.4	Ring hydroxylating beta subunit	8	0
1658	82598	d.17.4.6	Orange carotenoid protein, C-terminal domain	4	0
1659	89851	d.17.4.7	Association domain of calcium/calmodulin-dependent protein kinase type II alpha subunit, CAMK2A	3	-7
1660	88803	d.17.6.1	Archaeosine tRNA-guanine transglycosylase, C2 domain	1	0
1661	110832	d.17.6.3	Nip7p homolog, N-terminal domain	2	-12
1662	102817	d.17.7.1	Putative dsDNA mimic	1	-1
1663	56488	d.170.1.1	Scavenger receptor cysteine-rich (SRCR) domain	2	-1
1664	103355	d.170.1.2	Hepsin, N-terminal domain	3	-2
1665	56492	d.170.2.1	A heparin-binding domain	3	-3
1666	56497	d.171.1.1	Fibrinogen C-terminal domain-like	1	0
1667	56508	d.173.1.1	Methionine synthase SAM-binding domain	17	-13
1668	75590	d.173.1.2	Hypothetical protein TM0269	1	0
1669	56513	d.174.1.1	Nitric oxide (NO) synthase oxygenase domain	15	-2
1670	56520	d.175.1.1	Penicillin binding protein dimerisation domain	3	-3
1671	56525	d.176.1.1	Oxidoreductase molybdopterin-binding domain	28	-14
1672	56530	d.177.1.1	FAH	12	-25
1673	56535	d.178.1.1	Aromatic aminoacid monoxygenases, catalytic and oligomerization domains	14	-12
1674	56543	d.179.1.1	Substrate-binding domain of HMG-CoA reductase	13	-9
1675	54448	d.18.1.1	Transcriptional coactivator PC4 C-terminal domain	1	-4
1676	75375	d.18.1.2	Plant transcriptional regulator PBF-2	1	-2
1677	56554	d.181.1.1	Insert subdomain of RNA polymerase alpha subunit	7	-20
1678	56564	d.183.1.1	Major capsid protein gp5	10	0
1679	90077	d.184.1.3	Ubiquinol-cytochrome c reductase 8 kDa protein	4	0
1680	63412	d.185.1.1	MPP-like	10	-18
1681	64294	d.185.1.2	Autoinducer-2 production protein LuxS	8	-3
1682	64235	d.187.1.1	Photosystem I subunit PsaD	2	-1
1683	64264	d.188.1.1	Prokaryotic ribosomal protein L17	22	-15
1684	64269	d.189.1.1	PX domain	5	-5
1685	54453	d.19.1.1	MHC antigen-recognition domain	1	0
1686	64289	d.190.1.1	Chorismate lyase	1	-1
1687	64377	d.192.1.1	YlxR-like	1	-3
1688	64398	d.193.1.1	Hsp33 domain	2	-2
1689	111238	d.194.1.2	YfiH-like	12	-14
1690	68931	d.197.1.1	Protein-L-isoaspartyl O-methyltransferase, C-terminal domain	1	0
1691	69646	d.198.2.1	Arp2/3 complex subunits	1	-5
1692	53956	d.2.1.1	Family 19 glycosidase	15	-1
1693	53960	d.2.1.2	C-type lysozyme	3	-1
1694	53984	d.2.1.4	Lambda lysozyme	7	0
1695	53987	d.2.1.5	G-type lysozyme	3	-4
1696	53991	d.2.1.6	Bacterial muramidase, catalytic domain	10	-5
1697	53996	d.2.1.7	Chitosanase	5	0
1698	54496	d.20.1.1	UBC-related	1	0
1699	75383	d.20.1.2	UEV domain	5	-3
1700	110843	d.20.1.3	RWD domain	2	-4
1701	69688	d.200.1.1	Integrin beta tail domain	1	-3
1702	69696	d.201.1.1	SRP19	6	-6
1703	69706	d.202.1.1	Transcription factor NusA, N-terminal domain	12	-9
1704	69722	d.203.1.1	DsrC, the gamma subunit of dissimilatory sulfite reductase	10	0
1705	69755	d.204.1.1	Ribosome binding protein Y (YfiA homologue)	2	-1
1706	69762	d.205.1.1	GTP cyclohydrolase I feedback regulatory protein, GFRP	1	-4
1707	69787	d.206.1.1	YggU-like	3	-2
1708	69797	d.207.1.1	Thymidylate synthase-complementing protein Thy1	12	-5
1709	69820	d.208.1.1	MTH1598-like	8	-2
1710	69849	d.209.1.1	LCCL domain	1	-4
1711	54507	d.21.1.1	Diaminopimelate epimerase	13	-12
1712	89863	d.21.1.2	PhzC/PhzF-like	33	-23
1713	110863	d.21.1.3	Proline racemase	36	-7
1714	69865	d.210.1.1	Argininosuccinate synthetase, C-terminal domain	3	-20
1715	48404	d.211.1.1	Ankyrin repeat	18	-7
1716	75400	d.211.2.1	Plakin repeat	2	0
1717	55217	d.212.1.1	TolA	2	0
1718	64326	d.212.1.2	TonB	1	0
1719	75413	d.214.1.1	Hypothetical protein MTH1880	1	0
1720	75554	d.215.1.1	Smc hinge domain	7	-5
1721	63764	d.217.1.1	SAND domain	2	0
1722	82611	d.217.1.2	SMAD4-binding domain of oncoprotein Ski	1	-6
1723	81300	d.218.1.2	DNA polymerase beta-like	11	-7
1724	81589	d.218.1.3	Poly(A) polymerase, PAP, N-terminal domain	1	-3
1725	82661	d.218.1.4	Poly A polymerase head domain-like	21	-10
1726	102937	d.218.1.6	2'-5'-oligoadenylate synthetase 1, OAS1, N-terminal domain	1	-2
1727	102940	d.218.1.7	Archaeal tRNA CCA-adding enzyme catalytic domain	4	-2
1728	102945	d.218.1.8	RelA/SpoT domain	4	-3
1729	110933	d.218.1.9	GlnE-like domain	6	-3
1730	81605	d.219.1.1	PP2C-like	1	-1
1731	64244	d.22.1.2	Domain G2 of nidogen-1	3	-5
1732	81659	d.220.1.1	Metal cation-transporting ATPase, ATP-binding domain N	3	-4
1733	82603	d.221.1.1	Nuclease A inhibitor (NuiA)	3	0
1734	82608	d.222.1.1	YbaB-like	3	0
1735	82616	d.223.1.1	Swapped Polo-box domain	3	-5
1736	102856	d.223.1.2	Polo-box duplicated region	3	-4
1737	82650	d.224.1.1	SufE-like	6	-11
1738	102928	d.224.1.2	NifU/IscU domain	17	-23
1739	82715	d.225.1.1	Multidrug efflux transporter AcrB TolC docking domain; DN and DC subdomains	15	-18
1740	82785	d.227.1.1	Ohr/OsmC resistance proteins	12	-20
1741	90027	d.227.1.2	YhfA-like	4	-3
1742	82809	d.228.1.1	Replication modulator SeqA, C-terminal DNA-binding domain	1	0
1743	82830	d.229.1.1	MesJ substrate recognition domain-like	1	0
1744	54519	d.23.1.1	Transcriptional factor tubby, C-terminal domain	2	-4
1745	88799	d.230.1.1	N-terminal, heterodimerisation domain of RBP7 (RpoE)	1	0
1746	89808	d.230.2.1	Dodecin-like	1	0
1747	89812	d.230.3.1	Amyloid beta a4 protein copper binding domain (domain 2)	1	-1
1748	89818	d.232.1.1	Mago nashi protein	2	-10
1749	89873	d.233.1.1	Inhibitor of vertebrate lysozyme, Ivy	5	-1
1750	89891	d.234.1.1	Proguanylin	2	-3
1751	89896	d.235.1.1	Hypothetical protein Yhr087W	1	-1
1752	90003	d.237.1.1	Hypothetical protein YjiA, C-terminal domain	1	0
1753	90065	d.238.1.1	Hypothetical protein TM0875	1	0
1754	90074	d.239.1.1	GCM domain	1	-1
1755	54524	d.24.1.1	Pilin	2	0
1756	100880	d.240.1.1	Lesion bypass DNA polymerase (Y-family), little finger domain	6	-3
1757	100967	d.241.1.1	Translation initiation factor 2 beta, aIF2beta, N-terminal domain	3	0
1758	102736	d.241.2.1	Trigger factor ribosome-binding domain	3	-7
1759	102825	d.243.1.1	Colicin D nuclease domain	2	0
1760	102830	d.244.1.1	Cell division protein ZapA-like	1	0
1761	102849	d.245.1.1	NSFL1 (p97 ATPase) cofactor p47, SEP domain	1	-4
1762	102861	d.246.1.1	mRNA decapping enzyme DcpS N-terminal domain	3	-6
1763	102876	d.247.1.1	Chromosomal protein MC1	2	0
1764	102887	d.248.1.1	Coproporphyrinogen III oxidase	4	-13
1765	102892	d.249.1.1	Hypothetical protein Ta1206	1	0
1766	54530	d.25.1.1	Mitochondrial glycoprotein MAM33-like	1	-6
1767	103026	d.250.1.1	Aminomethyltransferase folate-binding domain	11	-19
1768	103033	d.251.1.1	Hypothetical protein YwqG	8	-2
1769	103040	d.252.1.1	CheC-like	1	0
1770	103166	d.256.1.1	Ta1353-like	24	-5
1771	103257	d.257.1.1	Hypothetical protein TM0160	13	-3
1772	103264	d.258.1.1	Chorismate synthase, AroC	4	-6
1773	54535	d.26.1.1	FKBP immunophilin/proline isomerase	20	-15
1774	54549	d.26.1.2	GreA transcript cleavage factor, C-terminal domain	3	-2
1775	54557	d.26.3.1	Chitinase insertion domain	14	-6
1776	103360	d.260.1.1	Suppressor of Fused, N-terminal domain	2	-1
1777	103366	d.261.1.1	Hypothetical protein PH1602	28	-24
1778	103371	d.262.1.1	NinB	2	0
1779	89976	d.263.1.1	Hypothetical protein Yml108w	1	0
1780	56748	d.264.1.1	PriA-like	5	0
1781	103305	d.264.1.2	Bifunctional DNA primase/polymerase N-terminal domain	2	0
1782	55121	d.265.1.1	Pseudouridine synthase I TruA	8	-9
1783	69746	d.265.1.2	Pseudouridine synthase II TruB	17	-15
1784	75459	d.265.1.3	Pseudouridine synthase RsuA/RluD	9	-8
1785	103021	d.265.1.4	tRNA pseudouridine synthase TruD	6	-3
1786	110853	d.268.1.2	Hypothetical protein PF0380	1	-1
1787	110858	d.269.1.1	Gamma-glutamyl cyclotransferase-like	4	-10
1788	54566	d.27.1.1	Ribosomal protein S16	3	-2
1789	110922	d.270.1.1	2-isopropylmalate synthase LeuA, allosteric (dimerisation) domain	4	0
1790	110943	d.271.1.1	HSP90 C-terminal domain	4	-4
1791	111007	d.272.1.1	Dystroglycan, domain 2	2	-4
1792	111039	d.273.1.1	YjbQ-like	14	-15
1793	111058	d.274.1.1	Hypothetical protein PF0899	1	0
1794	111065	d.275.1.1	Hut operon positive regulatory protein HutP	3	0
1795	111127	d.278.1.1	H-NOX domain	2	-6
1796	111149	d.279.1.1	YggX-like	2	-2
1797	54571	d.28.1.1	Ribosomal protein S19	5	-4
1798	111250	d.280.1.1	Sulfolobus fructose-1,6-bisphosphatase-like	12	-6
1799	111279	d.282.1.1	SSo0622-like	3	-1
1800	111284	d.283.1.1	Putative modulator of DNA gyrase, PmbA/TldD	20	-15
1801	82698	d.284.1.1	PurS subunit of FGAM synthetase	3	0
1802	111002	d.284.1.2	FGAM synthase PurL, PurS-like domain	9	-1
1803	54576	d.29.1.1	Ribosomal protein L31e	1	0
1804	54002	d.3.1.1	Papain-like	8	-13
1805	110773	d.3.1.11	Ubiquitin thiolesterase protein OTUB2 (Otubain-2)	14	-4
1806	54040	d.3.1.3	Calpain large subunit, catalytic domain (domain II)	3	-8
1807	54044	d.3.1.4	Transglutaminase core	2	0
1808	54047	d.3.1.5	Arylamine N-acetyltransferase	23	-6
1809	54050	d.3.1.6	Ubiquitin carboxyl-terminal hydrolase UCH-L	1	-3
1810	54054	d.3.1.7	Adenain-like	4	-8
1811	82568	d.3.1.9	Ubiquitin carboxyl-terminal hydrolase, UCH	1	0
1812	54581	d.30.1.1	Allophycocyanin linker chain (domain)	1	-2
1813	54586	d.31.1.1	Cdc48 domain 2-like	2	-2
1814	54594	d.32.1.1	Glyoxalase I (lactoylglutathione lyase)	7	-16
1815	54598	d.32.1.2	Antibiotic resistance proteins	16	-2
1816	54602	d.32.1.3	Extradiol dioxygenases	20	-25
1817	64257	d.32.1.4	Methylmalonyl-CoA epimerase	4	0
1818	75396	d.32.1.5	Hypothetical protein YecM (EC4020)	1	-2
1819	110880	d.32.1.6	Hypothetical protein BC1747	9	-1
1820	110883	d.32.1.7	3-demethylubiquinone-9 3-methyltransferase	20	-11
1821	110888	d.32.1.8	Hypothetical protein YycE	2	-2
1822	54612	d.33.1.1	Bacterial protein-export protein SecB	6	-1
1823	54617	d.34.1.1	DNA-binding domain of Mlu1-box binding protein MBP1	2	0
1824	54622	d.35.1.1	Heme-binding protein A (HasA)	1	0
1825	54627	d.36.1.1	Chalcone isomerase	1	0
1826	54632	d.37.1.1	CBS-domain pair	6	-1
1827	54638	d.38.1.1	4HBT-like	17	-4
1828	54641	d.38.1.2	beta-Hydroxydecanol thiol ester dehydrase	5	-4
1829	54644	d.38.1.3	Acyl-CoA thioesterase	24	-8
1830	82636	d.38.1.4	MaoC-like	9	-3
1831	89902	d.38.1.5	PaaI/YdiI-like	20	-11
1832	110902	d.38.1.6	FabZ-like	14	-18
1833	54649	d.39.1.1	DLC	7	-7
1834	54061	d.4.1.1	HNH-motif	4	0
1835	54066	d.4.1.2	DNA/RNA non-specific endonuclease	4	-1
1836	102726	d.4.1.6	Endonuclease I	7	-1
1837	110778	d.4.1.7	Caspase-activated DNase, CAD (DffB, DFF40)	2	-11
1838	54666	d.41.1.1	CO dehydrogenase molybdoprotein N-domain-like	28	-13
1839	54676	d.41.2.1	NadC N-terminal domain-like	5	-5
1840	110907	d.41.2.2	Monomeric nicotinate phosphoribosyltransferase N-terminal domain-like	3	-2
1841	110910	d.41.2.3 changed to c.1.17.2	Monomeric nicotinate phosphoribosyltransferase C-terminal domain	18	-4
1842	54681	d.41.3.1	Pyrimidine nucleoside phosphorylase C-terminal domain	8	-2
1843	54687	d.41.4.1	Ribosomal protein L10e	3	-12
1844	54691	d.41.5.1	Molybdopterin synthase subunit MoaE	8	-9
1845	54696	d.42.1.1	BTB/POZ domain	8	-2
1846	54701	d.42.1.2	Tetramerization domain of potassium channels	1	0
1847	54714	d.43.1.1	Elongation factor Ts (EF-Ts), dimerisation domain	8	-19
1848	54720	d.44.1.1	Fe,Mn superoxide dismutase (SOD), C-terminal domain	8	-22
1849	54737	d.45.1.1	Ribosomal protein L7/12, C-terminal domain	7	-9
1850	82641	d.45.1.2	Adaptor protein ClpS (YljA)	1	-9
1851	54748	d.47.1.1	Ribosomal L11/L12e N-terminal domain	19	-7
1852	54753	d.48.1.1	RecA protein, C-terminal domain	2	-2
1853	54763	d.49.1.1	Signal recognition particle alu RNA binding heterodimer, SRP9/14	2	-6
1854	54077	d.5.1.1	Ribonuclease A-like	1	-1
1855	54769	d.50.1.1	Double-stranded RNA-binding domain (dsRBD)	5	-5
1856	54778	d.50.1.2	Ribosomal S5 protein, N-terminal domain	6	-2
1857	82645	d.50.1.3	The homologous-pairing domain of Rad52 recombinase	4	-6
1858	54783	d.50.2.1	Porphobilinogen deaminase (hydroxymethylbilane synthase), C-terminal domain	5	-4
1859	54787	d.50.3.1	PI-Pfui intein middle domain	1	0
1860	110917	d.50.4.1	Peptidyl-tRNA hydrolase domain	8	-9
1861	54792	d.51.1.1	Eukaryotic type KH-domain (KH-domain type I)	10	-9
1862	54811	d.52.2.1	GMP synthetase C-terminal dimerisation domain	27	-22
1863	54815	d.52.3.1	Prokaryotic type KH domain (KH-domain type II)	5	-7
1864	75421	d.52.4.1	YhbC-like, N-terminal domain	1	0
1865	82654	d.52.5.1	Probable GTPase Der, C-terminal domain	1	0
1866	82658	d.52.6.1	BolA-like	6	-10
1867	89920	d.52.7.1	Ribosome-binding factor A, RbfA	5	-2
1868	54822	d.53.1.1	Ribosomal protein S3 C-terminal domain	4	-1
1869	54827	d.54.1.1	Enolase N-terminal domain-like	1	-13
1870	54844	d.55.1.1	Ribosomal protein L22	17	-14
1871	54850	d.56.1.1	GroEL-like chaperone, intermediate domain	3	0
1872	54853	d.56.1.2	Group II chaperonin (CCT, TRIC), intermediate domain	2	-1
1873	54858	d.57.1.1	DNA damage-inducible protein DinI	1	0
1874	54870	d.58.1.2	7-Fe ferredoxin	9	-11
1875	54874	d.58.1.3	Archaeal ferredoxins	1	0
1876	54877	d.58.1.4	Single 4Fe-4S cluster ferredoxin	3	-4
1877	54884	d.58.1.5	Ferredoxin domains from multidomain proteins	40	-30
1878	54976	d.58.10.1	Acylphosphatase-like	11	-7
1879	54981	d.58.11.1	EF-G/eEF-2 domains III and V	3	-5
1880	54985	d.58.12.1	eEF-1beta-like	7	-8
1881	54996	d.58.14.1	Ribosomal protein S6	1	-1
1882	55000	d.58.15.1	Ribosomal protein S10	3	-5
1883	55004	d.58.16.1	Poly(A) polymerase, PAP, C-terminal domain	3	-5
1884	55009	d.58.17.1	HMA, heavy metal-associated domain	14	-3
1885	55022	d.58.18.1	Phosphoglycerate dehydrogenase, regulatory (C-terminal) domain	1	0
1886	55025	d.58.18.2	Allosteric threonine deaminase C-terminal domain	5	-3
1887	55028	d.58.18.3	Phenylalanine metabolism regulatory domain	1	-6
1888	102999	d.58.18.4	Nickel responsive regulator NikR, C-terminal domain	3	0
1889	110980	d.58.18.5	Glycine cleavage system transcriptional repressor	1	-1
1890	55032	d.58.19.1	Bacterial exopeptidase dimerisation domain	8	-2
1891	54894	d.58.2.1	Aspartate carbamoyltransferase, Regulatory-chain, N-terminal domain	10	-3
1892	55036	d.58.20.1	NAD-binding domain of HMG-CoA reductase	10	-12
1893	55041	d.58.21.1	Molybdenum cofactor biosynthesis protein C, MoaC	14	-33
1894	55045	d.58.22.1	TRADD, N-terminal domain	1	-5
1895	55049	d.58.23.1	Probable ACP-binding domain of malonyl-CoA ACP transacylase	4	-5
1896	55053	d.58.24.1	CheY-binding domain of CheA	3	0
1897	55061	d.58.26.1	Homoserine kinase	1	0
1898	64281	d.58.26.2	Mevalonate 5-diphosphate decarboxylase	12	-11
1899	75450	d.58.26.3	Mevalonate kinase	5	-6
1900	89950	d.58.26.5	4-(cytidine 5'-diphospho)-2C-methyl-D-erythritol kinase IspE	2	-2
1901	103011	d.58.26.7	Galactokinase	4	-7
1902	55069	d.58.28.1	Peptide methionine sulfoxide reductase	10	-13
1903	55074	d.58.29.1	Adenylyl and guanylyl cyclase catalytic domain	17	-2
1904	54898	d.58.3.1	Pancreatic carboxypeptidase, activation domain	2	-2
1905	54905	d.58.3.2	Subtilase propeptides/inhibitors	2	-2
1906	75431	d.58.3.3	Prohormone convertase 1 pro-domain	4	-2
1907	55084	d.58.30.1	6-hydroxymethyl-7,8-dihydropterin pyrophosphokinase, HPPK	24	-27
1908	55089	d.58.31.1	Methyl-coenzyme M reductase gamma chain	1	-1
1909	55094	d.58.31.2	Methyl-coenzyme M reductase alpha and beta chain N-terminal domain	1	-1
1910	55104	d.58.32.1	Vanillyl-alcohol oxidase-like	10	-2
1911	55109	d.58.32.2	D-lactate dehydrogenase	17	-1
1912	64284	d.58.32.3	Cholesterol oxidase	3	-1
1913	110990	d.58.32.4	Cytokinin dehydrogenase 1	1	0
1914	55113	d.58.33.1	Formylmethanofuran:tetrahydromethanopterin formyltransferase	9	0
1915	55117	d.58.34.1	Formiminotransferase domain of formiminotransferase-cyclodeaminase.	15	-4
1916	55125	d.58.36.1	Duplicated SiR/NiR-like domains 1 and 3	3	0
1917	69738	d.58.38.1	Urease metallochaperone UreE, C-terminal domain	3	-1
1918	69743	d.58.39.1	Glutamyl tRNA-reductase catalytic, N-terminal domain	2	0
1919	54910	d.58.4.1	Muconalactone isomerase, MLI	11	-1
1920	110965	d.58.4.10	Chlorite dismutase-like	5	0
1921	69733	d.58.4.2	Lrp/AsnC-like transcriptional regulator C-terminal domain	2	0
1922	89927	d.58.4.4	Plant stress-induced protein	1	0
1923	102959	d.58.4.5	PG130-like	5	0
1924	102962	d.58.4.6	Hypothetical protein YjcS	1	0
1925	102965	d.58.4.7	YciI-like	2	-2
1926	110962	d.58.4.9	DGPF domain (Pfam 04946)	3	0
1927	75446	d.58.40.1	D-ribose-5-phosphate isomerase (RpiA), lid domain	8	-2
1928	82672	d.58.41.1	SEA domain	5	-3
1929	82680	d.58.42.1	N-utilization substance G protein NusG, N-terminal domain	12	-9
1930	82690	d.58.43.1	Mechanosensitive channel protein MscS (YggB), C-terminal domain	4	0
1931	82694	d.58.44.1	Multidrug efflux transporter AcrB pore domain; PN1, PN2, PC1 and PC2 subdomains	17	-9
1932	89943	d.58.46.1	eEF1-gamma domain	2	-12
1933	89947	d.58.47.1	Hypothetical protein VC0424	1	0
1934	89958	d.58.48.1	MTH1187-like	11	-4
1935	110987	d.58.48.2	Putative thiamin/HMP-binding protein YkoF	2	0
1936	89964	d.58.49.1	YajQ-like	4	-4
1937	54914	d.58.5.1	Prokaryotic signal transducing protein	13	-11
1938	75434	d.58.5.2	Divalent ion tolerance proteins CutA (CutA1)	33	-15
1939	88851	d.58.5.3	ATP phosphoribosyltransferase (ATP-PRTase, HisG), regulatory C-terminal domain	2	-2
1940	89934	d.58.5.4	DUF190/COG1993	2	0
1941	110994	d.58.51.1	eIF-2-alpha, C-terminal domain	2	-9
1942	110998	d.58.52.1	Sporulation related repeat	1	0
1943	54920	d.58.6.1	Nucleoside diphosphate kinase, NDK	2	-20
1944	54929	d.58.7.1	Canonical RBD	1	-3
1945	54954	d.58.7.2	Non-canonical RBD domain	1	-3
1946	64276	d.58.7.3	Splicing factor U2AF subunits	6	-2
1947	102987	d.58.7.4	Smg-4/UPF3	3	-4
1948	54967	d.58.9.1	Ribulose 1,5-bisphosphate carboxylase-oxygenase	18	-2
1949	55130	d.59.1.1	Ribosomal protein L30p/L7e	4	-2
1950	54099	d.6.1.1	Prion-like	1	-3
1951	55140	d.60.1.2	Rob transcription factor, C-terminal domain	1	0
1952	75462	d.60.1.3	Gyrase inhibitory protein GyrI (SbmC, YeeB)	1	0
1953	55145	d.61.1.1	tRNA splicing product Appr>p cyclic nucleotide phosphodiesterase	1	-1
1954	89967	d.61.1.2	2'-5' RNA ligase LigT	1	0
1955	103043	d.61.1.3	2',3'-cyclic nucleotide 3'-phosphodiesterase, catalytic domain	4	-3
1956	55155	d.63.1.1	mRNA triphosphatase CET1	3	-2
1957	55160	d.64.1.1	eIF1-like	5	-4
1958	55167	d.65.1.1	Muramoyl-pentapeptide carboxypeptidase	1	-1
1959	55170	d.65.1.2	Hedgehog (development protein), N-terminal signaling domain	1	-2
1960	111019	d.65.1.3	MepA-like	7	-1
1961	111022	d.65.1.4	VanX-like	9	-2
1962	55178	d.66.1.2	Ribosomal protein S4	6	0
1963	55182	d.66.1.3	Heat shock protein 15 kD	5	-2
1964	75465	d.66.1.4	Tyrosyl-tRNA synthetase (TyrRS), C-terminal domain	3	-2
1965	103046	d.66.1.6	YbcJ-like	1	0
1966	55187	d.67.1.1	Threonyl-tRNA synthetase (ThrRS), second 'additional' domain	13	-14
1967	103051	d.67.1.2	AlaX-like	3	-2
1968	55191	d.67.2.1	Arginyl-tRNA synthetase (ArgRS), N-terminal 'additional' domain	3	-4
1969	55195	d.67.3.1	Ribosome recycling factor, RRF	7	-5
1970	103055	d.67.4.1	General secretion pathway protein M, EpsM	1	-1
1971	55201	d.68.1.1	Translation initiation factor IF3, C-terminal domain	7	-21
1972	55206	d.68.2.1	RNA 3'-terminal phosphate cyclase, RPTC	30	-14
1973	55209	d.68.2.2	Enolpyruvate transferase, EPT	6	-7
1974	88852	d.68.3.3	SirA-like	6	-1
1975	75472	d.68.4.1	YhbY-like	6	-3
1976	64587	d.68.5.1	C-terminal domain of ProRS	3	0
1977	82705	d.68.6.1	DNA-binding protein AlbA	6	-2
1978	111027	d.68.6.2	Hypothetical protein At2g34160	1	0
1979	82709	d.68.7.1	R3H domain	1	-5
1980	55230	d.71.1.1	Cell division protein MinE topological specificity domain	1	0
1981	55235	d.72.1.1	Cyanase C-terminal domain	7	0
1982	55240	d.73.1.1	RuBisCO, small subunit	8	-5
1983	55249	d.74.1.1	PCD-like	11	-8
1984	55253	d.74.2.1	C-terminal domain of arginine repressor	2	-2
1985	55258	d.74.3.1	RNA polymerase alpha subunit dimerisation domain	10	-3
1986	64311	d.74.3.2	RBP11/RpoL	6	-1
1987	55262	d.74.4.1	GAD domain	13	-6
1988	55268	d.75.1.1	tRNA-intron endonuclease N-terminal domain-like	2	0
1989	55272	d.75.2.1	DNA repair protein MutS, domain I	7	-13
1990	55278	d.76.1.1	GYF domain	4	-4
1991	55283	d.77.1.1	Ribosomal protein L5	3	-6
1992	55288	d.78.1.1	RPB5	6	-11
1993	55299	d.79.1.1	YjgF/L-PSP	18	-33
1994	55304	d.79.1.2	Chorismate mutase	13	-5
1995	55308	d.79.2.1	Tubulin, C-terminal domain	4	-7
1996	55316	d.79.3.1	L30e/L7ae ribosomal proteins	2	-2
1997	55323	d.79.3.2	ERF1/Dom34 C-terminal domain-like	1	-4
1998	75480	d.79.3.3	RNA 2'-O ribose methyltransferase substrate binding domain	1	0
1999	55327	d.79.4.1	PurM N-terminal domain-like	2	-6
[truncated: 250 more rows]
